# Supplementary material for: Formation of α-chalcogenyl acrylamides through unprecedented chalcogen-mediated metal-free oxyfunctionalization of ynamides with DMSO as an oxidant
Source: Royal Society of Chemistry journal article supplement (doi:10.1039/c5cc10517j), 2016-01-01

# Formation of $\alpha$ -Chalcogenyl Acrylamides through Unprecedented Chalcogen-Mediated Metal-Free Oxyfunctionalization of Ynamides with DMSO as Oxidant

Hai Huang, Luning Tang, Qi Liu, Yang Xi, Guangke He\* and Hongjun Zhu\*

*Department of Applied Chemistry, College of Chemistry and Molecular Engineering, Nanjing Tech  
University, Nanjing 211816, P. R. China.*

|                                                                                                                                         |     |
|-----------------------------------------------------------------------------------------------------------------------------------------|-----|
| <i>General Method</i> .....                                                                                                             | S1  |
| <i>General experimental procedure and characterization data</i> .....                                                                   | S1  |
| 1. <i>General procedure for the preparation of ynamides 1; Typical Procedure I</i> .....                                                | S2  |
| 2. <i>General procedure for the preparation of arenesulfonyl chlorides; Typical Procedure II</i> ..                                     | S2  |
| 3. <i>General procedure for the preparation of <math>\alpha</math>-chalcogenyl acrylamides; Typical Procedure<br/>        III</i> ..... | S3  |
| 3.1. <i><math>^1\text{H}</math> NMR monitoring on the reaction of ynamides 1a at different time</i> .....                               | S4  |
| 3.2. <i>Characterization data for New compounds</i> .....                                                                               | S4  |
| 3.3. <i>Large-scale experiments</i> .....                                                                                               | S14 |
| 3.4. <i>Synthesis of <math>\alpha</math>-selanyl acrylamides</i> .....                                                                  | S14 |
| 3.5. <i>Synthesis of <math>\alpha</math>-tellanyl acrylamides</i> .....                                                                 | S15 |
| 4. <i>Experiment for Mechanistic Study</i> .....                                                                                        | S16 |
| <i>NMR Spectra</i> .....                                                                                                                | S20 |

## General Method

All reactions were performed in reaction tubes under nitrogen atmosphere.  $^1\text{H}$  NMR and  $^{13}\text{C}$  NMR were recorded at respectively 400 MHz and 100 MHz spectrometer using  $\text{CDCl}_3$  as solvent. The following abbreviations are used to describe peak patterns where appropriate: br = broad, s = singlet, d = doublet, t = triplet, q = quartet, m = multiplet. Coupling constants are reported in Hertz (Hz). Chemical shifts are reported in ppm relative to the internal standard tetramethylsilane ( $\delta = 0$  ppm) for  $^1\text{H}$  NMR and deuteriochloroform ( $\delta = 77.00$  ppm) for  $^{13}\text{C}$  NMR. High-resolution mass spectra (HRMS) were recorded on an ESI-TOF (time-of-flight) mass spectrometer. Melting points were measured with micro melting point apparatus.

## General experimental procedure and characterization data

### 1. General procedure for the preparation of ynamides **1**; Typical Procedure I

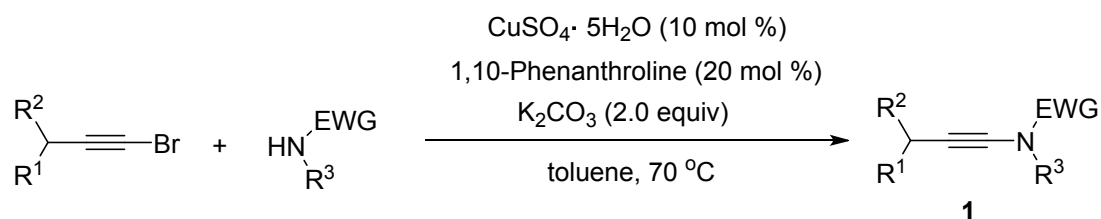

Ynamides **1** were synthesized and characterized according to the method reported by Hsung.<sup>1</sup> To a mixture of *tert*-butyloxycarbamates (8.0 mmol),  $\text{K}_2\text{CO}_3$  (16 mmol),  $\text{CuSO}_4 \cdot 5\text{H}_2\text{O}$  (0.8 mmol), and 1,10-phenanthroline (1.6 mmol) in a reaction vial was added a solution of bromoalkyne<sup>2</sup> (8.8 mmol) in toluene (15 mL). The reaction mixture was capped and heated in an oil bath at 70 °C for 18 h while being monitored with TLC analysis. Upon completion, the reaction mixture was cooled to room temperature and diluted with EtOAc and filtered through Celite, and the filtrate was concentrated in vacuum. The crude products were purified by silica gel flash chromatography on a silica gel column with petroleum ether (PE) and ethyl acetate (EA) as eluent to afford directing products.

### 2. General procedure for the preparation of arenesulfonyl chlorides; Typical Procedure II

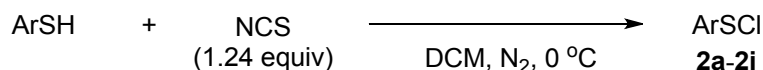

Arenesulfonyl chlorides were synthesized according to previously reported methodology.<sup>3</sup>

Under an atmosphere of N<sub>2</sub>, *N*-chlorosuccinimide (1.66 g, 12.4 mmol) was placed in a 100-mL reaction flask and dissolved in dichloromethane (50 mL). Arenethiol (1.02 mL, 10.0 mmol) was added slowly at 0 °C and the reaction mixture was stirred at 0 °C for 15 min. After the volatiles were removed, hexane (15 mL) was added to the residue. The resulting white precipitate of succinimide was filtrated. Evaporation followed by distillation gave the desire arenesulfenyl chlorides.

### 3. General procedure for the preparation of $\alpha$ -chalcogenyl acrylamides; Typical Procedure III

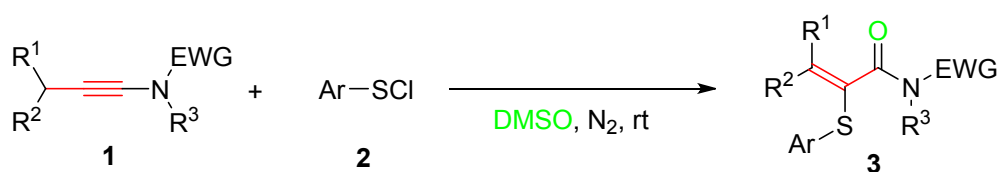

In a 10 mL flame-dried Schlenk tube were placed ynamides **1** (0.3 mmol), ArS-Cl **2** (2.0 equiv) and DMSO (2.0 mL) under nitrogen condition. The reaction mixture had been stirred at rt for 1 hour while was monitored with TLC analysis. The reaction mixture was quenched by adding EtOAc and water. The combined organic layers were washed by brine, dried over Na<sub>2</sub>SO<sub>4</sub>, concentrated under reduced pressure. The residue was purified by silica gel column chromatography to give the desired product **3**.

### 3.1. <sup>1</sup>H NMR monitoring on the reaction of ynamides **1a** at different time.

**Figure 1.** <sup>1</sup>H NMR monitoring on the reaction of ynamides **1a** at different time.

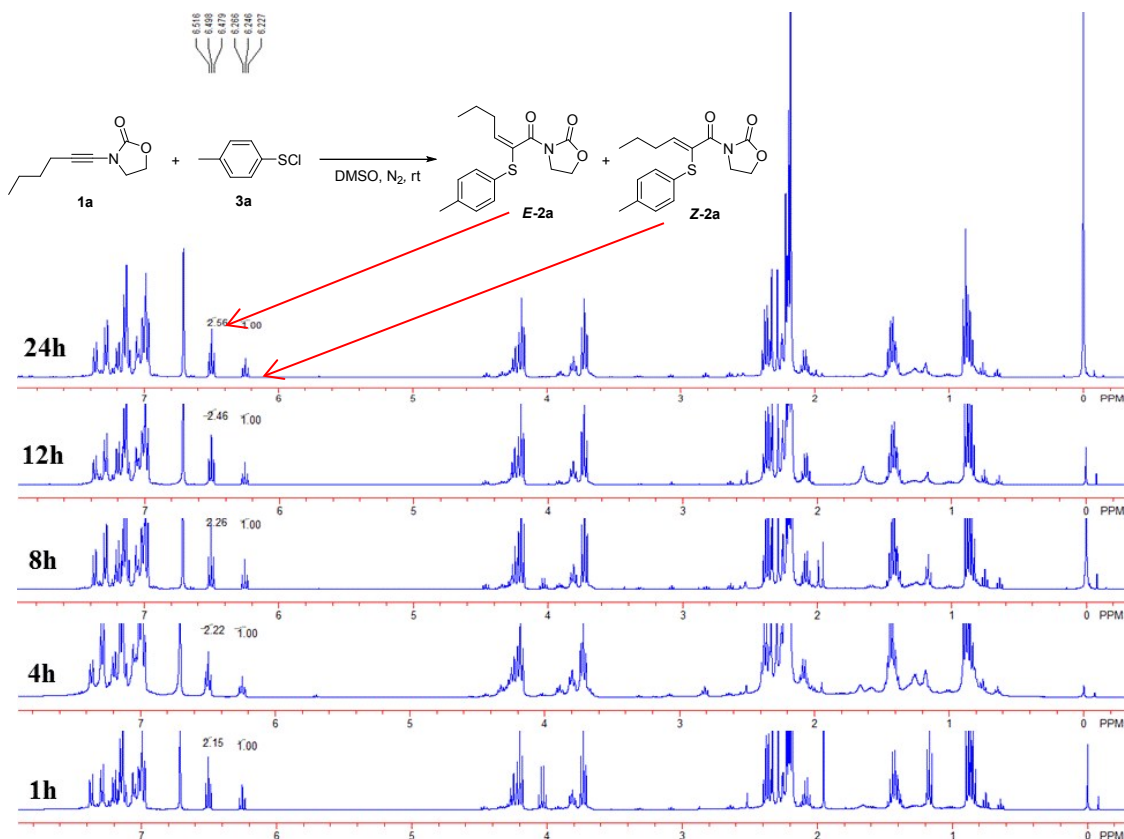

### 3.2. Characterization data for New compounds.

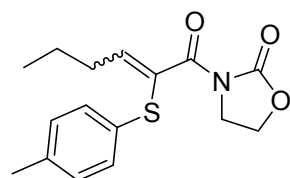

**3-(2-(p-tolylthio)hex-2-enyl)oxazolidin-2-one (3a):** 72.3 mg, 79% total yield; **(E)-isomer:** 49.4 mg, 54% yield; colorless oil; <sup>1</sup>H NMR (400 MHz, CDCl<sub>3</sub>) δ 7.28 (d, *J* = 8.0 Hz, 2 H), 7.09 (d, *J* = 8.0 Hz, 2 H), 6.34 (t, *J* = 8.0 Hz, 1 H), 4.35 (t, *J* = 8.0 Hz, 2 H), 3.91 (t, *J* = 8.0 Hz, 2 H), 2.30 (s, 3 H), 2.17 (q, *J* = 7.6 Hz, 2 H), 1.55-1.44 (m, 2 H), 0.93 (t, *J* = 7.6 Hz, 3 H); <sup>13</sup>C NMR (100 MHz, CDCl<sub>3</sub>) δ 166.2, 151.9, 144.7, 137.0, 130.8, 130.1, 129.7, 126.5, 62.0, 42.3, 32.9, 22.0, 21.0, 13.7; **MS** (ESI): *m/z* (%) = 328.2 (100) [M + Na]<sup>+</sup>. **IR** ν(KBr, cm<sup>-1</sup>) 2961, 2922, 1784, 1680, 1384, 1358, 1286, 1218, 1111, 1038, 806, 756, 717; **HRMS** (ESI<sup>+</sup>): *m/z* calcd. for C<sub>16</sub>H<sub>19</sub>NO<sub>3</sub>S ([M+H]<sup>+</sup>) 306.1164, Found: 306.1172. **(Z)-isomer:** 22.9 mg, 25% yield; colorless oil; <sup>1</sup>H NMR (400 MHz, CDCl<sub>3</sub>) δ 7.23 (d, *J* = 8.0 Hz, 2 H), 7.07 (d, *J* = 8.0 Hz, 2 H), 6.59 (t, *J* = 7.2 Hz, 1 H), 4.30 (t, *J* = 8.0 Hz, 2 H), 3.83 (t, *J* = 7.6 Hz, 2 H), 2.45 (q, *J* = 7.6 Hz, 2 H), 2.29 (s, 3 H), 1.58-1.46 (m, 2 H), 0.97 (t, *J* = 7.2 Hz, 3 H); <sup>13</sup>C NMR (100 MHz, CDCl<sub>3</sub>) δ 167.9, 152.4, 146.6, 136.6, 131.0, 129.8, 129.5, 129.0, 62.2, 43.0, 31.8, 21.6, 21.0, 13.8; **MS** (ESI): *m/z* (%) = 328.2

(100) [M + Na]<sup>+</sup>. **IR**  $\nu$ (KBr, cm<sup>-1</sup>) 2960, 2924, 2871, 1783, 1676, 1523, 1443, 1384, 1343, 1186, 1117, 1007, 807, 754; **HRMS** (ESI<sup>+</sup>): m/z calcd. for C<sub>16</sub>H<sub>19</sub>NO<sub>3</sub>S ([M+H]<sup>+</sup>) 306.1164, Found: 306.1161.

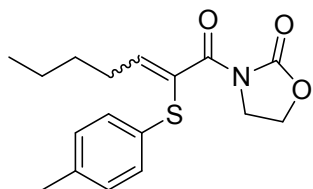

**3-(2-(p-tolylthio)hept-2-enoyl)oxazolidin-2-one (3b)**: 69.8 mg, 73% total yield; (**E**)-isomer: 48.0 mg, 50 % yield; colorless oil; **<sup>1</sup>H NMR** (400 MHz, CDCl<sub>3</sub>)  $\delta$  7.28 (d,  $J$  = 8.4 Hz, 2 H), 7.09 (d,  $J$  = 8.0 Hz, 2 H), 6.34 (t,  $J$  = 7.6 Hz, 1 H), 4.35 (t,  $J$  = 8.0 Hz, 2 H), 3.90 (t,  $J$  = 8.4 Hz, 2 H), 2.30 (s, 3 H), 2.19 (q,  $J$  = 7.2 Hz, 2 H), 1.49-1.40 (m, 2 H), 1.39-1.29 (m, 2 H), 0.89 (t,  $J$  = 7.2 Hz, 3 H); **<sup>13</sup>C NMR** (100 MHz, CDCl<sub>3</sub>)  $\delta$  166.2, 151.9, 144.9, 136.9, 130.8, 130.1, 129.7, 126.3, 62.0, 42.3, 30.8, 30.7, 22.2, 21.0, 13.8; **MS** (ESI):m/z (%) = 342.2 (100) [M + Na]<sup>+</sup>. **IR**  $\nu$ (KBr, cm<sup>-1</sup>) 2964, 2929, 2860, 1782, 1686, 1495, 1392, 1346, 1280, 1197, 1116, 1038, 880, 755; **HRMS** (ESI<sup>+</sup>): m/z calcd. for C<sub>17</sub>H<sub>21</sub>NO<sub>3</sub>S ([M+Na]<sup>+</sup>) 342.1140, Found: 342.1152. (**Z**)-isomer: 21.8 mg, 23 % yield; colorless oil; **<sup>1</sup>H NMR** (400 MHz, CDCl<sub>3</sub>)  $\delta$  7.22 (d,  $J$  = 8.4 Hz, 2 H), 7.07 (d,  $J$  = 8.0 Hz, 2 H), 6.58 (t,  $J$  = 7.6 Hz, 1 H), 4.30 (t,  $J$  = 7.6 Hz, 2 H), 3.82 (t,  $J$  = 8.0 Hz, 2 H), 2.48 (q,  $J$  = 7.2 Hz, 2 H), 2.29 (s, 3 H), 1.51-1.42 (m, 2 H), 1.41-1.34 (m, 2 H), 0.90 (t,  $J$  = 7.2 Hz, 3 H); **<sup>13</sup>C NMR** (100 MHz, CDCl<sub>3</sub>)  $\delta$  167.8, 152.4, 146.8, 136.5, 131.0, 129.7, 129.4, 128.8, 62.1, 43.0, 30.3, 29.6, 22.3, 20.9, 13.8; **MS** (ESI):m/z (%) = 342.2 (100) [M + Na]<sup>+</sup>. **IR**  $\nu$ (KBr, cm<sup>-1</sup>) 2957, 2924, 2871, 1785, 1681, 1492, 1383, 1359, 1312, 1218, 1119, 1038, 807, 757; **HRMS** (ESI<sup>+</sup>): m/z calcd. for C<sub>17</sub>H<sub>21</sub>NO<sub>3</sub>S ([M+Na]<sup>+</sup>) 342.1140, Found: 342.1166.

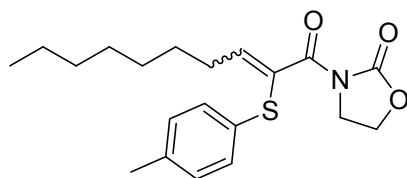

**3-(2-(p-tolylthio)dec-2-enoyl)oxazolidin-2-one (3c)**: 69.2 mg, 64% total yield; (**E**)-isomer: 46.2 mg, 43 % yield; colorless oil; **<sup>1</sup>H NMR** (400 MHz, CDCl<sub>3</sub>)  $\delta$  7.28 (d,  $J$  = 8.0 Hz, 2 H), 7.09 (d,  $J$  = 8.0 Hz, 2 H), 6.34 (t,  $J$  = 7.6 Hz, 1 H), 4.35 (t,  $J$  = 8.0 Hz, 2 H), 3.91 (t,  $J$  = 8.0 Hz, 2 H), 2.30 (s, 3 H), 2.18 (q,  $J$  = 7.6 Hz, 2 H), 1.50-1.41 (m, 2 H), 1.35-1.20 (m, 8 H), 0.88 (t,  $J$  = 6.4 Hz, 3 H); **<sup>13</sup>C NMR** (100 MHz, CDCl<sub>3</sub>)  $\delta$  166.2, 151.8, 144.9, 137.0, 130.9, 130.2, 129.7, 126.3, 62.0, 42.3, 31.7, 31.0, 29.1, 29.0, 28.7, 22.6, 21.0, 14.0; **MS** (ESI):m/z (%) = 384.3 (100) [M + Na]<sup>+</sup>. **IR**  $\nu$ (KBr, cm<sup>-1</sup>) 2961, 2930, 2873, 1784, 1681, 1492, 1386, 1364, 1302, 1205, 1068, 807, 768; **HRMS** (ESI<sup>+</sup>): m/z calcd. for C<sub>20</sub>H<sub>27</sub>NO<sub>3</sub>S

([M+H]<sup>+</sup>) 362.1790, Found: 362.1782. **(Z)-isomer**: 23.0 mg, 21 % yield; colorless oil; <sup>1</sup>H NMR (400 MHz, CDCl<sub>3</sub>) δ 7.25-7.20 (m, 2 H), 7.07 (d, *J* = 7.6 Hz, 2 H), 6.59 (t, *J* = 7.2 Hz, 1 H), 4.31 (t, *J* = 7.6 Hz, 2 H), 3.83 (t, *J* = 8.0 Hz, 2 H), 2.47 (q, *J* = 7.2 Hz, 2 H), 2.29 (s, 3 H), 1.60-1.42 (m, 2 H), 1.38-1.20 (m, 8 H), 0.87 (t, *J* = 6.8 Hz, 3 H); <sup>13</sup>C NMR (100 MHz, CDCl<sub>3</sub>) δ 167.9, 152.4, 147.1, 136.5, 131.1, 129.8, 129.4, 128.8, 62.1, 43.0, 31.7, 29.9, 29.2, 29.0, 28.2, 22.6, 21.0, 14.1; **MS** (ESI):*m/z* (%) = 384.3 (100) [M + Na]<sup>+</sup>. **IR** ν (KBr, cm<sup>-1</sup>) 2961, 2922, 2871, 1783, 1676, 1532, 1455, 1382, 1364, 1288, 1076, 856, 807, 766; **HRMS** (ESI<sup>+</sup>): *m/z* calcd. for C<sub>20</sub>H<sub>27</sub>NO<sub>3</sub>S ([M+H]<sup>+</sup>) 362.1790, Found: 362.1785.

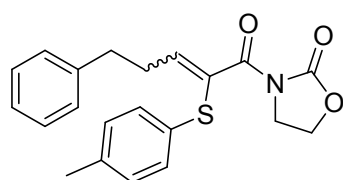

**3-(5-phenyl-2-(p-tolylthio)pent-2-enoyl)oxazolidin-2-one (3d)**:

71.5 mg, 65% total yield; **(E)-isomer**: 48.2 mg, 44% yield; colorless oil; <sup>1</sup>H NMR (400 MHz, CDCl<sub>3</sub>) δ 7.31-7.16 (m, 7 H), 6.08 (d, *J* = 8.0 Hz, 2 H), 6.31 (t, *J* = 8.0 Hz, 1 H), 4.31 (t, *J* = 8.0

Hz, 2 H), 3.85 (t, *J* = 7.6 Hz, 2 H), 2.78 (q, *J* = 7.6 Hz, 2 H), 2.50 (q, *J* = 8.0 Hz, 2 H), 2.30 (s, 3 H); <sup>13</sup>C NMR (100 MHz, CDCl<sub>3</sub>) δ 166.0, 151.8, 142.7, 140.6, 137.2, 130.4, 130.3, 129.7, 128.4, 128.3, 127.4, 126.1, 62.0, 42.3, 34.7, 32.5, 21.0; **MS** (ESI):*m/z* (%) = 390.2 (100) [M + Na]<sup>+</sup>. **IR** ν (KBr, cm<sup>-1</sup>) 2961, 2923, 2873, 1778, 1682, 1543, 1443, 1376, 1352, 1254, 1068, 854, 754; **HRMS** (ESI<sup>+</sup>): *m/z* calcd. for C<sub>21</sub>H<sub>21</sub>NO<sub>3</sub>S ([M+Na]<sup>+</sup>) 390.1140, Found: 390.1158. **(Z)-isomer**: 23.3 mg, 21% yield; colorless oil; <sup>1</sup>H NMR (400 MHz, CDCl<sub>3</sub>) δ 7.28 (t, *J* = 8.4 Hz, 2 H), 7.22-7.16 (m, 5 H), 7.06 (d, *J* = 8.0 Hz, 2 H), 6.60-6.52 (m, 1 H), 4.29 (t, *J* = 8.0 Hz, 2 H), 3.80 (t, *J* = 7.6 Hz, 1 H), 2.80-2.77 (br, 4 H), 2.29 (s, 3 H); <sup>13</sup>C NMR (100 MHz, CDCl<sub>3</sub>) δ 167.6, 152.4, 144.7, 140.8, 136.8, 130.7, 129.8, 129.7, 128.4, 126.1, 62.2, 42.9, 34.2, 31.4, 21.0; **MS** (ESI):*m/z* (%) = 390.2 (100) [M + Na]<sup>+</sup>. **IR** ν (KBr, cm<sup>-1</sup>) 2963, 2921, 2872, 1780, 1677, 1523, 1455, 1368, 1342, 1233, 1118, 854, 756; **HRMS** (ESI<sup>+</sup>): *m/z* calcd. for C<sub>21</sub>H<sub>21</sub>NO<sub>3</sub>S ([M+Na]<sup>+</sup>) 390.1140, Found: 390.1153.

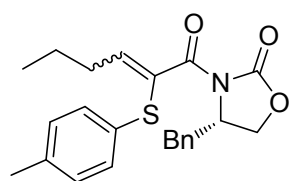

**(S)-4-benzyl-3-(2-(p-tolylthio)hex-2-enoyl)oxazolidin-2-one (3e)**:

92.5 mg, 78% total yield; **(E)-isomer**: 59.1 mg, 50 % yield; colorless oil; <sup>1</sup>H NMR (400 MHz, CDCl<sub>3</sub>) δ 7.33-7.24 (m, 5 H), 7.15 (d, *J* = 6.8 Hz, 2 H), 7.10 (d, *J* = 7.2 Hz, 2 H), 6.37 (t, *J* = 8.0 Hz, 1 H), 4.53 (br,

1 H), 4.12-4.06 (m, 2 H), 3.16 (br, 1 H), 2.54 (br, 1 H), 2.29 (s, 3 H), 2.24-2.17 (m, 2 H), 1.58-1.47 (m, 2 H), 0.96 (t,  $J = 7.2$  Hz, 3 H);  $^{13}\text{C}$  NMR (100 MHz,  $\text{CDCl}_3$ )  $\delta$  166.1, 151.8, 144.5, 137.1, 135.1, 130.7, 130.3, 129.7, 129.3, 128.9, 127.3, 126.9, 66.2, 55.1, 37.6, 32.9, 22.0, 21.0, 13.8; **MS** (ESI): $m/z$  (%) = 396.3 (100)  $[\text{M} + \text{H}]^+$ . **IR**  $\nu$  (KBr,  $\text{cm}^{-1}$ ) 2961, 2934, 2862, 1788, 1674, 1438, 1352, 1311, 1268, 1204, 1007, 856, 754, 701; **HRMS** (ESI $^+$ ):  $m/z$  calcd. for  $\text{C}_{23}\text{H}_{25}\text{NO}_3\text{S}$  ( $[\text{M}+\text{Na}]^+$ ) 418.1453, Found: 418.1461. **(Z)-isomer**: 33.4 mg, 28 % yield; white solid; mp 121-122 °C (*n*-hexane/ethylacetate);  $^1\text{H}$  NMR (400 MHz,  $\text{CDCl}_3$ )  $\delta$  7.30-7.21 (m, 5 H), 7.12-7.06 (m, 4 H), 6.59 (d,  $J = 7.6$  Hz, 2 H), 4.50-4.42 (m, 1 H), 4.09-4.00 (m, 2 H), 3.12 (dd,  $J_1 = 3.6$  Hz,  $J_2 = 13.6$  Hz, 1 H), 2.51-2.39 (m, 3 H), 2.28 (s, 3 H), 1.58-1.49 (m, 2 H), 0.98 (t,  $J = 7.6$  Hz, 3 H);  $^{13}\text{C}$  NMR (100 MHz,  $\text{CDCl}_3$ )  $\delta$  167.9, 152.4, 146.3, 136.7, 135.1, 130.9, 129.8, 129.7, 129.6, 129.3, 128.9, 127.2, 66.4, 55.5, 37.3, 31.9, 21.6, 21.0, 13.8; **MS** (ESI): $m/z$  (%) = 396.3 (100)  $[\text{M} + \text{H}]^+$ . **IR**  $\nu$  (KBr,  $\text{cm}^{-1}$ ) 2957, 2932, 2854, 1790, 1678, 1493, 1454, 1352, 1297, 1279, 1218, 1089, 813, 753, 700; **HRMS** (ESI $^+$ ):  $m/z$  calcd. for  $\text{C}_{23}\text{H}_{25}\text{NO}_3\text{S}$  ( $[\text{M}+\text{Na}]^+$ ) 418.1453, Found: 418.1475. **Anal. calcd** for  $\text{C}_{23}\text{H}_{25}\text{NO}_3\text{S}$ : C 69.84, H 6.37, N 3.54. Found: C 69.92, H 6.55, N 3.66.

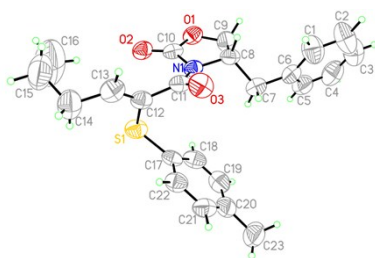

Crystal data for **Z-3e**:  $\text{C}_{23}\text{H}_{25}\text{NO}_3\text{S}$ ;  $M = 395.50$ ; Monoclinic; space group  $P2_1$ ; final R indices [ $I > 2\sigma(I)$ ]:  $R_1 = 0.0429$ ,  $wR_2 = 0.1192$ , R indices(all data):  $R_1 = 0.0489$ ,  $wR_2 = 0.1234$ ,  $a = 13.5980(8)$  Å,  $b = 5.7831(3)$  Å,  $c = 14.8716(8)$  Å;  $\alpha = 90^\circ$ ,  $\beta = 111.469(2)^\circ$ ,  $\gamma = 90^\circ$ ;  $V = 1088.34(10)$  Å $^3$ ;  $T = 296\text{K}$ ;  $Z = 2$ ;

reflection measured/independent: 7583/3727 ( $R_{\text{int}} = 0.026$ ), number of observations [ $I > 2\sigma(I)$ ]: 3350, parameters: 255. CCDC-1432338 contains the supplementary crystallographic data for this paper. These data can be obtained free of charge from The Cambridge Crystallographic Data Centre via [www.ccdc.cam.ac.uk/data\\_request/cif](http://www.ccdc.cam.ac.uk/data_request/cif).

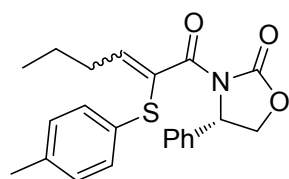

**(S)-4-phenyl-3-(2-(p-tolylthio)hex-2-enoyl)oxazolidin-2-one (3f)**:

81.3 mg, 71% total yield; **(E)-isomer**: 45.8 mg, 40% yield; colorless oil;  $^1\text{H}$  NMR (400 MHz,  $\text{CDCl}_3$ )  $\delta$  7.36-7.12 (m, 7 H), 7.00 (d,  $J = 7.6$  Hz, 2 H), 6.38 (t,  $J = 8.0$  Hz, 1 H), 5.34 (q,  $J = 4.0$  Hz, 1 H), 4.62 (t,  $J = 8.8$  Hz, 1 H), 4.20 (dd,  $J = 8.4$  Hz, 1 H), 2.27 (s, 3 H), 2.15-2.00 (m, 2 H), 1.50-1.39 (m, 2 H), 0.88 (t,  $J = 7.2$  Hz, 3 H);  $^{13}\text{C}$  NMR (100 MHz,  $\text{CDCl}_3$ )  $\delta$  165.7, 152.1, 146.4, 138.1, 136.5, 130.9,

129.6, 129.5, 128.9, 128.5, 126.5, 125.9, 69.9, 57.5, 32.7, 21.9, 21.0, 13.7; **MS** (ESI):m/z (%) = 382.3 (100) [M + H]<sup>+</sup>. **IR**  $\nu$ (KBr, cm<sup>-1</sup>) 2960, 2928, 2861, 1788, 1687, 1492, 1382, 1320, 1197, 1100, 1044, 807, 713, 699; **HRMS** (ESI<sup>+</sup>): m/z calcd. for C<sub>22</sub>H<sub>23</sub>NO<sub>3</sub>S ([M+Na]<sup>+</sup>) 404.1296, Found: 404.1321. **(Z)-isomer**: 35.5 mg, 31% yield; white solid; mp 93-94 °C (*n*-hexane/ethylacetate); **<sup>1</sup>H NMR** (400 MHz, CDCl<sub>3</sub>)  $\delta$  7.25-7.17 (m, 3 H), 7.15-7.09 (m, 4 H), 7.00 (d, *J* = 8.0 Hz, 2 H), 6.67 (t, *J* = 7.2 Hz, 1 H), 5.30 (dd, *J*<sub>1</sub> = 6.4 Hz, *J*<sub>2</sub> = 8.8 Hz, 1 H), 4.59 (t, *J* = 8.8 Hz, 1 H), 4.16 (dd, *J*<sub>1</sub> = 6.4 Hz, *J*<sub>2</sub> = 8.8 Hz, 1 H), 2.46 (q, *J* = 7.2 Hz, 2 H), 2.29 (s, 3 H), 1.55-1.44 (m, 2 H), 0.95 (t, *J* = 7.2 Hz, 3 H); **<sup>13</sup>C NMR** (100 MHz, CDCl<sub>3</sub>)  $\delta$  167.7, 152.8, 148.7, 137.6, 136.2, 131.2, 129.8, 129.4, 128.9, 126.0, 69.9, 58.2, 32.0, 21.6, 21.0, 13.8; **MS** (ESI):m/z (%) = 382.3 (100) [M + H]<sup>+</sup>. **IR**  $\nu$ (KBr, cm<sup>-1</sup>) 2960, 2932, 2871, 1790, 1686, 1511, 1459, 1378, 1321, 1115, 1034, 854, 723; **HRMS** (ESI<sup>+</sup>): m/z calcd. for C<sub>22</sub>H<sub>23</sub>NO<sub>3</sub>S ([M+Na]<sup>+</sup>) 404.1296, Found: 404.1323. **Anal. calcd** for C<sub>22</sub>H<sub>23</sub>NO<sub>3</sub>S: C 69.26, H 6.08, N 3.67. Found: C 69.26, H 6.13, N 3.76.

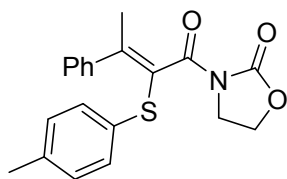

**(Z)-3-(3-phenyl-2-(*p*-tolylthio)but-2-enoyl)oxazolidin-2-one (Z-3g):**

68.7 mg, 65% yield; white solid; mp 114-115 °C (*n*-hexane/ethylacetate); **<sup>1</sup>H NMR** (400 MHz, CDCl<sub>3</sub>)  $\delta$  7.41-7.29 (m, 5 H), 7.23 (d, *J* = 8.4 Hz, 2 H), 7.06 (d, *J* = 8.0 Hz, 2 H), 4.29 (t, *J* = 7.6 Hz, 2 H), 3.82 (b, 2 H), 2.29 (s, 3 H), 2.16 (s, 3 H); **<sup>13</sup>C NMR** (100 MHz, CDCl<sub>3</sub>)  $\delta$  166.5, 151.8, 145.2, 140.5, 137.4, 131.6, 130.0, 129.5, 128.1, 127.9, 127.6, 123.8, 61.9, 42.3, 23.5, 21.1; **MS** (ESI):m/z (%) = 354.2 (100) [M + H]<sup>+</sup>. **IR**  $\nu$ (KBr, cm<sup>-1</sup>) 2961, 2922, 2871, 1775, 1682, 1533, 1448, 1367, 1320, 1117, 1034, 1006, 856, 754; **HRMS** (ESI<sup>+</sup>): m/z calcd. for C<sub>20</sub>H<sub>19</sub>NO<sub>3</sub>S ([M+Na]<sup>+</sup>) 376.0983, Found: 376.0997. **Anal. calcd** for C<sub>20</sub>H<sub>19</sub>NO<sub>3</sub>S: C 67.97, H 5.42, N 3.96. Found: C 68.02, H 5.51, N 4.04.

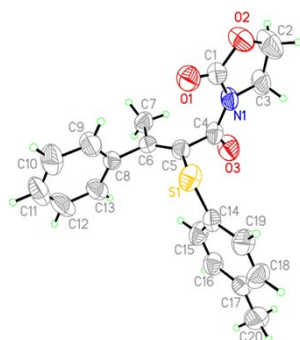

Crystal data for **Z-3g**: C<sub>20</sub>H<sub>19</sub>NO<sub>3</sub>S, M = 353.42, Triclinic, space group *P*-1, final R indices [*I* > 2 $\sigma$ (*I*)]: *R*<sub>1</sub> = 0.0417, *wR*<sub>2</sub> = 0.1127, R indices (all data): *R*<sub>1</sub> = 0.0572, *wR*<sub>2</sub> = 0.1248, *a* = 7.326(5) Å, *b* = 10.134(7) Å, *c* = 12.489(8) Å,  $\alpha$  = 80.774(11)°,  $\beta$  = 82.540(12)°,  $\gamma$  =



77.770(11)°,  $V = 890.0(10) \text{ \AA}^3$ ,  $T = 296 \text{ K}$ ,  $Z = 2$ , reflection measured/independent: 4938/3122 ( $R_{\text{int}} = 0.021$ ), number of observations [ $I > 2\sigma(I)$ ]: 2417, parameters: 228. CCDC-1422307 contains the supplementary crystallographic data for this paper. These data can be obtained free of charge from The Cambridge Crystallographic Data Centre via [www.ccdc.cam.ac.uk/data\\_request/cif](http://www.ccdc.cam.ac.uk/data_request/cif).

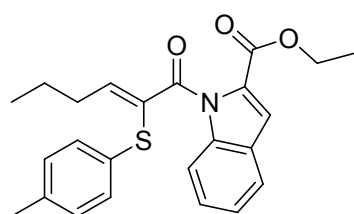

**(Z)-ethyl 1-(2-(p-tolylthio)hex-2-enoyl)-1H-indole-2-carboxylate (E-3h):** 78.2 mg, 64% yield; colorless oil;  $^1\text{H NMR}$  (400 MHz,  $\text{CDCl}_3$ )  $\delta$  7.45 (t,  $J = 8.0 \text{ Hz}$ , 2 H), 7.21 (s, 1 H), 7.19-7.13 (m, 1 H), 7.12-7.06 (m, 1 H), 7.02 (t,  $J = 7.6 \text{ Hz}$ , 1 H), 6.87 (d,  $J = 8.0 \text{ Hz}$ , 2 H), 6.63 (d,  $J = 8.0 \text{ Hz}$ , 2 H), 4.28 (q,  $J = 7.2 \text{ Hz}$ , 2 H), 2.49 (q,  $J = 7.2 \text{ Hz}$ , 2 H), 1.99 (s, 3 H), 1.62-1.51 (m, 2 H), 1.38 (t,  $J = 7.2 \text{ Hz}$ , 3 H), 1.01 (t,  $J = 7.6 \text{ Hz}$ , 3 H);  $^{13}\text{C NMR}$  (100 MHz,  $\text{CDCl}_3$ )  $\delta$  167.7, 161.1, 149.6, 138.0, 136.9, 133.7, 130.3, 129.7, 129.2, 129.1, 126.9, 126.5, 122.8, 121.6, 115.2, 113.9, 61.2, 32.7, 21.8, 20.7, 14.3, 14.0; **MS** (ESI):  $m/z$  (%) = 408.3 (100)  $[\text{M} + \text{H}]^+$ . **IR**  $\nu$  (KBr,  $\text{cm}^{-1}$ ) 2959, 2930, 1719, 1688, 1540, 1444, 1397, 1378, 1298, 1203, 1147, 805, 747; **HRMS** (ESI $^+$ ):  $m/z$  calcd. for  $\text{C}_{24}\text{H}_{25}\text{NO}_3\text{S}$  ( $[\text{M} + \text{Na}]^+$ ) 430.1453, Found: 430.1489.

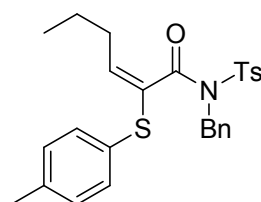

**(E)-N-benzyl-2-(p-tolylthio)-N-tosylhex-2-enamide (E-3i):** 94.3 mg, 66% yield; white solid; mp 96-97 °C (*n*-hexane/ethylacetate);  $^1\text{H NMR}$  (400 MHz,  $\text{CDCl}_3$ )  $\delta$  7.68 (d,  $J = 8.0 \text{ Hz}$ , 2 H), 7.34-7.24 (m, 5 H), 7.13 (d,  $J = 8.0 \text{ Hz}$ , 2 H), 7.07 (d,  $J = 8.0 \text{ Hz}$ , 2 H), 6.94 (d,  $J = 7.6 \text{ Hz}$ , 2 H), 6.01 (t,  $J = 8.0 \text{ Hz}$ , 1 H), 5.16 (s, 2 H), 2.39 (s, 3 H), 2.28 (s, 3 H), 1.70 (q,  $J = 7.6 \text{ Hz}$ , 2 H), 1.19-1.09 (m, 2 H), 0.75 (t,  $J = 7.2 \text{ Hz}$ , 3 H);  $^{13}\text{C NMR}$  (100 MHz,  $\text{CDCl}_3$ )  $\delta$  166.7, 145.2, 144.3, 137.3, 136.8, 135.7, 130.6, 129.7, 129.2, 129.0, 128.7, 128.4, 127.5, 127.4, 127.1, 50.2, 32.4, 21.7, 21.6, 21.1, 13.5; **MS** (ESI):  $m/z$  (%) = 502.2 (100)  $[\text{M} + \text{Na}]^+$ . **IR**  $\nu$  (KBr,  $\text{cm}^{-1}$ ) 2956, 2927, 2849, 1680, 1596, 1494, 1455, 1343, 1164, 811, 750, 708; **HRMS** (ESI $^+$ ):  $m/z$  calcd. for  $\text{C}_{27}\text{H}_{29}\text{NO}_3\text{S}_2$  ( $[\text{M} + \text{Na}]^+$ ) 502.1487, Found: 502.1514. **Anal. calcd** for  $\text{C}_{27}\text{H}_{29}\text{NO}_3\text{S}_2$ : C 67.61, H 6.09, N 2.92. Found: C 67.53, H 6.11, N 2.87.

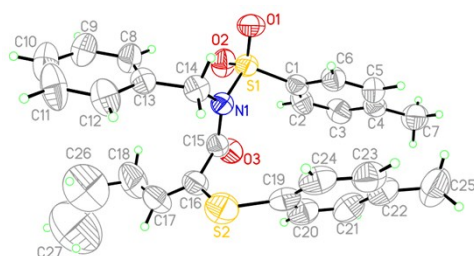

Crystal data for **E-3i**:  $\text{C}_{27}\text{H}_{29}\text{NO}_3\text{S}_2$ ;  $M = 479.63$ ; Monoclinic; space group  $P2_1/c$ ; final R indices 9

[ $I > 2\sigma(I)$ ]:  $R_1=0.0596$ ,  $wR_2=0.1564$ ,  $R$  indices(all data):  $R_1=0.0837$ ,  $wR_2=0.1731$ ,  $a = 12.8698(16)$  Å,  $b = 13.2620(15)$  Å,  $c = 15.0271(18)$  Å;  $\beta = 92.583(4)^\circ$ ;  $V = 2562.2(5)$  Å<sup>3</sup>;  $T = 296$  K;  $Z = 4$ ; reflection measured/independent: 17942/4495 ( $R_{\text{int}} = 0.049$ ), number of observations [ $I > 2\sigma(I)$ ]: 3272, parameters: 295. CCDC-1432339 contains the supplementary crystallographic data for this paper. These data can be obtained free of charge from The Cambridge Crystallographic Data Centre via [www.ccdc.cam.ac.uk/data\\_request/cif](http://www.ccdc.cam.ac.uk/data_request/cif).

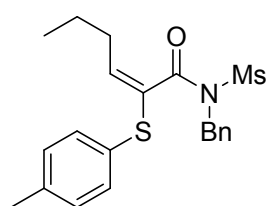

**(E)-N-benzyl-N-(methylsulfonyl)-2-(p-tolylthio)hex-2-enamide (E-3j):**

70.1 mg, 58% yield; colorless oil; <sup>1</sup>H NMR (400 MHz, CDCl<sub>3</sub>)  $\delta$  7.34-7.20 (m, 7 H), 7.13 (d,  $J = 8.4$  Hz, 2 H), 6.10 (t,  $J = 7.6$  Hz, 1 H), 5.11 (s, 2 H), 2.87 (s, 3 H), 2.32 (s, 3 H), 1.87 (q,  $J = 7.2$  Hz, 2 H), 1.31-1.20 (m, 2 H), 0.83 (t,  $J = 7.2$  Hz, 3 H); <sup>13</sup>C NMR (100 MHz, CDCl<sub>3</sub>)  $\delta$  167.4, 144.0, 138.1, 136.4, 131.4, 129.9, 128.6, 127.7, 127.6, 127.4, 49.4, 41.8, 32.6, 21.8, 21.1, 13.6; MS (ESI):m/z (%) = 426.2 (100) [M + Na]<sup>+</sup>. IR  $\nu$ (KBr, cm<sup>-1</sup>) 2964, 2926, 2867, 1683, 1602, 1488, 1400, 1353, 1164, 856, 756, 711; HRMS (ESI<sup>+</sup>): m/z calcd. for C<sub>21</sub>H<sub>25</sub>NO<sub>3</sub>S<sub>2</sub> ([M+Na]<sup>+</sup>) 426.1174, Found: 426.1234.

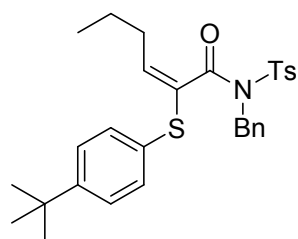

**(E)-N-benzyl-2-((4-(tert-butyl)phenyl)thio)-N-tosylhex-2-enamide**

**(E-3ib):** 106.3 mg, 68% yield; white solid; mp 71-72 °C (*n*-hexane/ethylacetate);

<sup>1</sup>H NMR (400 MHz, CDCl<sub>3</sub>)  $\delta$  7.73 (d,  $J = 8.4$  Hz, 2 H), 7.32-7.23 (m, 5 H), 7.21-7.16 (m, 4 H), 7.14-7.09 (m, 2 H), 6.06 (t,  $J = 7.6$  Hz, 1 H), 5.09 (s, 2 H), 2.40 (s, 3 H), 1.73 (q,  $J = 7.6$  Hz, 2 H), 1.27 (s, 9 H), 1.24-1.12 (m, 2 H), 0.76 (t,  $J = 7.2$  Hz, 3 H); <sup>13</sup>C NMR (100 MHz, CDCl<sub>3</sub>)  $\delta$  167.0, 150.4, 145.9, 144.4, 136.6, 135.9, 130.1, 129.8, 129.2, 128.6, 128.4, 127.6, 127.5, 126.8, 126.0, 50.3, 34.5, 32.5, 31.2, 21.7, 21.6, 13.6; MS (ESI):m/z (%) = 544.2 (100) [M + Na]<sup>+</sup>. IR  $\nu$ (KBr, cm<sup>-1</sup>) 2960, 2869, 1673, 1497, 1455, 1361, 1341, 1169, 1117, 822, 756, 704; HRMS (ESI<sup>+</sup>): m/z calcd. for C<sub>30</sub>H<sub>35</sub>NO<sub>3</sub>S<sub>2</sub> ([M+Na]<sup>+</sup>) 544.1956, Found: 544.1991. Anal. calcd for C<sub>30</sub>H<sub>35</sub>NO<sub>3</sub>S<sub>2</sub>: C 69.06, H 6.76, N 2.68. Found: C 69.14, H 6.74, N 2.74.

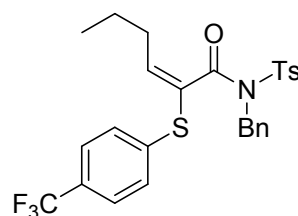

**(E)-N-benzyl-N-tosyl-2-((4-(trifluoromethyl)phenyl)thio)hex-2-**

**enamide (E-3ic):** 84.9 mg, 53% yield; white solid; mp 142-143 °C

(*n*-hexane/ethylacetate); **<sup>1</sup>H NMR** (400 MHz, CDCl<sub>3</sub>) δ 7.67 (d, *J* = 8.4 Hz, 2 H), 7.34 (d, *J* = 8.4 Hz, 2 H), 7.32-7.19 (m, 7 H), 7.12 (d, *J* = 8.4 Hz, 2 H), 6.27 (t, *J* = 8.0 Hz, H), 5.10 (s, 2 H), 2.35 (s, 3 H), 1.80 (q, *J* = 7.6 Hz, 2 H), 1.28-1.17 (m, 2 H), 0.80 (q, *J* = 7.2 Hz, 3 H); **<sup>13</sup>C NMR** (100 MHz, CDCl<sub>3</sub>) δ 166.5, 150.7, 144.8, 139.6, 136.5, 135.4, 129.2, 128.5, 128.4, 127.8, 127.7, 127.5, 125.5 (q, *J* = 3.6 Hz), 124.3, 122.6, 50.0, 32.7, 21.6, 21.4, 13.6; **MS** (ESI):*m/z* (%) = 556.2 (100) [M + Na]<sup>+</sup>. **IR** ν (KBr, cm<sup>-1</sup>) 2956, 2921, 1682, 1602, 1498, 1454, 1330, 1184, 1104, 829, 809, 784, 701; **HRMS** (ESI<sup>+</sup>): *m/z* calcd. for C<sub>27</sub>H<sub>26</sub>F<sub>3</sub>NO<sub>3</sub>S<sub>2</sub> ([M+Na]<sup>+</sup>) 556.1204, Found: 556.1235; **Anal. calcd** for C<sub>27</sub>H<sub>26</sub>F<sub>3</sub>NO<sub>3</sub>S<sub>2</sub>: C 60.77, H 4.91, N 2.62. Found: C 60.82, H 4.88, N 2.79.

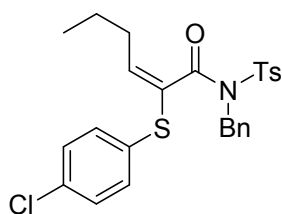

**(*E*)-*N*-benzyl-2-((4-chlorophenyl)thio)-*N*-tosylhex-2-enamide (**3id**):** 82.2 mg, 55% yield; white solid; mp 128-129 °C (*n*-hexane/ethylacetate); **<sup>1</sup>H NMR** (400 MHz, CDCl<sub>3</sub>) δ 7.66 (d, *J* = 8.0 Hz, 2 H), 7.34-7.23 (m, 5 H), 7.13 (d, *J* = 8.4 Hz, 2 H), 7.05 (s, 4 H), 6.12 (t, *J* = 8.0 Hz, 1 H), 5.16 (s, 2 H), 2.41 (s, 3 H), 1.73 (q, *J* = 7.6 Hz, 2 H), 1.21-1.11 (m, 2 H), 0.76 (t, *J* = 7.6 Hz, 3 H); **<sup>13</sup>C NMR** (100 MHz, CDCl<sub>3</sub>) δ 166.4, 147.7, 144.8, 136.7, 135.5, 132.9, 131.9, 130.6, 129.1, 128.9, 128.6, 128.5, 127.6, 127.5, 125.8, 50.0, 32.6, 21.7, 13.6; **MS** (ESI):*m/z* (%) = 500.3 (100) [M + H]<sup>+</sup>. **IR** ν (KBr, cm<sup>-1</sup>) 2960, 2871, 1683, 1474, 1360, 1169, 1089, 1009, 811, 756, 705; **HRMS** (ESI<sup>+</sup>): *m/z* calcd. for C<sub>26</sub>H<sub>26</sub>ClNO<sub>3</sub>S<sub>2</sub> ([M+Na]<sup>+</sup>) 522.0940, Found: 522.0972. **Anal. calcd** for C<sub>26</sub>H<sub>26</sub>ClNO<sub>3</sub>S<sub>2</sub>: C 62.45, H 5.24, N 2.80. Found: C 62.44, H 5.23, N 2.91.

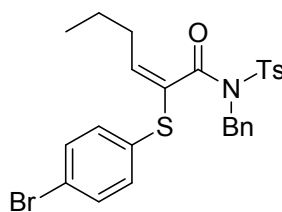

**(*E*)-*N*-benzyl-2-((4-bromophenyl)thio)-*N*-tosylhex-2-enamide (**3ie**):** 99.4 mg, 61% yield; white solid; mp 127-128 °C (*n*-hexane/ethylacetate); **<sup>1</sup>H NMR** (400 MHz, CDCl<sub>3</sub>) δ 7.66 (d, *J* = 8.4 Hz, 2 H), 7.33-7.25 (m, 5 H), 7.22-7.17 (m, 2 H), 7.14 (d, *J* = 8.0 Hz, 2 H), 7.01-6.96 (m, 2 H), 6.13 (t, *J* = 7.6 Hz, 1 H), 5.16 (s, 2 H), 2.43 (s, 3 H), 1.73 (q, *J* = 7.6 Hz, 2 H), 1.21-1.11 (m, 2 H), 0.76 (t, *J* = 7.2 Hz, 3 H); **<sup>13</sup>C NMR** (100 MHz, CDCl<sub>3</sub>) δ 166.4, 148.0, 144.8, 136.7, 135.5, 132.7, 131.8, 130.8, 129.1, 128.6, 128.5, 127.6, 127.5, 125.6, 120.9, 50.0, 32.6, 21.8, 21.6, 13.6; **MS** (ESI):*m/z* (%) = 544.2 (100) [M + H]<sup>+</sup>. **IR** ν (KBr, cm<sup>-1</sup>) 2959, 2929, 2869, 1683, 1471, 1359, 1169, 1085, 1005, 811, 756, 704; **HRMS** (ESI<sup>+</sup>): *m/z* calcd. for

C<sub>26</sub>H<sub>26</sub>BrNO<sub>3</sub>S<sub>2</sub> ([M+Na]<sup>+</sup>) 566.0435, Found: 566.0464. **Anal. calcd** for C<sub>26</sub>H<sub>26</sub>BrNO<sub>3</sub>S<sub>2</sub>: C 57.35, H 4.81, N 2.57. Found: C 57.29, H 4.68, N 2.63.

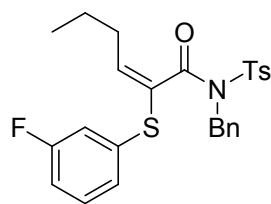

**(E)-N-benzyl-2-((3-fluorophenyl)thio)-N-tosylhex-2-enamide (E-3if):**

86.4 mg, 57% yield; white solid; mp 73-74 °C (*n*-hexane/ethylacetate); <sup>1</sup>H NMR (400 MHz, CDCl<sub>3</sub>) δ 7.68 (d, *J* = 8.4 Hz, 2 H), 7.33-7.22 (m, 5 H), 7.15-7.04 (m, 3 H), 6.92 (d, *J* = 8.0 Hz, 1 H), 6.85-6.74 (m, 2 H), 6.19 (t, *J* = 7.6 Hz, H), 5.13 (s, 2 H), 2.37 (s, 3 H), 1.76 (q, *J* = 8.0 Hz, 2 H), 1.24-1.14 (m, 2 H), 0.78 (t, *J* = 7.2 Hz, 3 H); <sup>13</sup>C NMR (100 MHz, CDCl<sub>3</sub>) δ 166.5, 162.5 (d, *J* = 247.5 Hz), 149.1, 144.6, 136.7, 136.2 (d, *J* = 7.7 Hz), 135.4, 129.9 (d, *J* = 8.5 Hz), 129.1, 128.6, 128.5, 127.6, 127.5, 125.1, 124.4 (d, *J* = 2.9 Hz), 115.7 (d, *J* = 23.1 Hz), 113.5 (d, *J* = 21.1 Hz), 50.0, 32.6, 21.6, 21.5, 13.6; **MS** (ESI):*m/z* (%) = 484.2 (100) [M + H]<sup>+</sup>. **IR** ν(KBr, cm<sup>-1</sup>) 2961, 2930, 1677, 1598, 1577, 1473, 1454, 1342, 1174, 1117, 943, 875, 766; **HRMS** (ESI<sup>+</sup>): *m/z* calcd. for C<sub>26</sub>H<sub>26</sub>FNO<sub>3</sub>S<sub>2</sub> ([M+Na]<sup>+</sup>) 506.1236, Found: 506.1263. **Anal. calcd** for C<sub>26</sub>H<sub>26</sub>FNO<sub>3</sub>S<sub>2</sub>: C 64.57, H 5.42, N 2.90. Found: C 64.33, H 5.51, N 3.02.

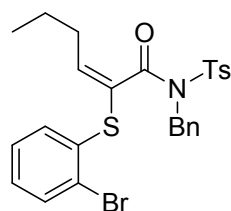

**(E)-N-benzyl-2-((2-bromophenyl)thio)-N-tosylhex-2-enamide (E-3ig):**

102.4 mg, 63% yield; white solid; mp 123-124 °C (*n*-hexane/ethylacetate); <sup>1</sup>H NMR (400 MHz, CDCl<sub>3</sub>) δ 7.72 (d, *J* = 8.4 Hz, 2 H), 7.42 (d, *J* = 7.6 Hz, 1 H), 7.33-7.22 (m, 5 H), 7.15 (dd, *J*<sub>1</sub> = 1.2 Hz, *J*<sub>2</sub> = 7.6 Hz, 1 H), 7.09 (d, *J* = 8.0 Hz, 2 H), 7.00 (td, *J*<sub>1</sub> = 7.6 Hz, *J*<sub>2</sub> = 0.8 Hz, 1 H), 6.92 (td, *J*<sub>1</sub> = 7.6 Hz, *J*<sub>2</sub> = 1.2 Hz, 1 H), 6.26 (t, *J* = 7.6 Hz, H), 5.16 (s, 2 H), 2.33 (s, 3 H), 1.80 (q, *J* = 7.6 Hz, 2 H), 1.27-1.16 (m, 2 H), 0.79 (t, *J* = 7.2 Hz, 3 H); <sup>13</sup>C NMR (100 MHz, CDCl<sub>3</sub>) δ 166.4, 151.0, 144.4, 136.7, 135.6, 135.3, 132.5, 129.6, 129.1, 128.5, 127.6, 127.5, 127.4, 127.1, 124.5, 121.6, 50.0, 32.7, 21.6, 13.6; **MS** (ESI):*m/z* (%) = 544.2 (100) [M + H]<sup>+</sup>. **IR** ν(KBr, cm<sup>-1</sup>) 2961, 2930, 2871, 1679, 1448, 1351, 1186, 1169, 1115, 1089, 1018, 943, 757; **HRMS** (ESI<sup>+</sup>): *m/z* calcd. for C<sub>26</sub>H<sub>26</sub>BrNO<sub>3</sub>S<sub>2</sub> ([M+Na]<sup>+</sup>) 566.0435, Found: 566.0449. **Anal. calcd** for C<sub>26</sub>H<sub>26</sub>BrNO<sub>3</sub>S<sub>2</sub>: C 57.35, H 4.81, N 2.57. Found: C 57.47, H 4.80, N 2.69.

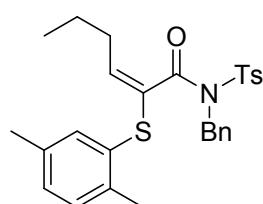

**(E)-N-benzyl-2-((2,5-dimethylphenyl)thio)-N-tosylhex-2-enamide (E-3jg):**

**3ih**): 105.3 mg, 71% yield; white solid; mp 67-68 °C (*n*-hexane/ethylacetate);  $^1\text{H NMR}$  (400 MHz,  $\text{CDCl}_3$ )  $\delta$  7.64 (d,  $J = 8.4$  Hz, 2 H), 7.35-7.22 (m, 5 H), 7.08 (d,  $J = 8.0$  Hz, 2 H), 7.00-6.94 (m, 2 H), 6.88-6.84 (m, 1 H), 5.90 (t,  $J = 7.6$  Hz, 1 H), 5.21 (s, 2 H), 2.36 (s, 3 H), 2.25 (s, 3 H), 2.14 (s, 3 H), 1.74 (q,  $J = 7.6$  Hz, 2 H), 1.21-1.10 (m, 2 H), 0.76 (t,  $J = 7.6$  Hz, 3 H);  $^{13}\text{C NMR}$  (100 MHz,  $\text{CDCl}_3$ )  $\delta$  166.7, 144.5, 144.3, 136.8, 136.0, 135.6, 135.2, 131.7, 131.2, 130.1, 129.0, 128.5, 128.4, 128.2, 127.5, 126.3, 50.2, 32.4, 21.8, 21.6, 20.7, 19.8, 13.5; **MS** (ESI):  $m/z$  (%) = 494.3 (100)  $[\text{M} + \text{H}]^+$ . **IR**  $\nu$  (KBr,  $\text{cm}^{-1}$ ) 2960, 2926, 2871, 1683, 1596, 1489, 1454, 1344, 1195, 1184, 1165, 1115, 1088, 943, 802, 755; **HRMS** (ESI $^+$ ):  $m/z$  calcd. for  $\text{C}_{28}\text{H}_{31}\text{NO}_3\text{S}_2$  ( $[\text{M} + \text{Na}]^+$ ) 516.1643, Found: 516.1679. **Anal. calcd** for  $\text{C}_{28}\text{H}_{31}\text{NO}_3\text{S}_2$ : C 68.12, H 6.33, N 2.84. Found: C 68.08, H 6.44, N 2.91.

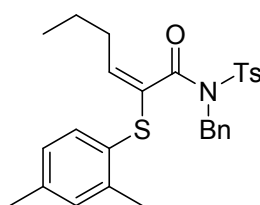

**(E)-N-benzyl-2-((2,4-dimethylphenyl)thio)-N-tosylhex-2-enamide (E-3ii)**:

110.2 mg, 74% yield; white solid; mp 81-82 °C (*n*-hexane/ethylacetate);  $^1\text{H NMR}$  (400 MHz,  $\text{CDCl}_3$ )  $\delta$  7.68 (d,  $J = 8.4$  Hz, 2 H), 7.35-7.22 (m, 5 H), 7.14 (d,  $J = 8.0$  Hz, 2 H), 7.06 (d,  $J = 7.6$  Hz, 1 H), 6.91 (s, 1 H), 6.75 (d,  $J = 8.0$  Hz, 1 H), 5.81 (t,  $J = 7.6$  Hz, 1 H), 5.19 (s, 2 H), 2.39 (s, 3 H), 2.26 (s, 3 H), 2.25 (s, 3 H), 1.69 (q,  $J = 7.2$  Hz, 2 H), 1.19-1.08 (m, 2 H), 0.74 (t,  $J = 7.2$  Hz, 3 H);  $^{13}\text{C NMR}$  (100 MHz,  $\text{CDCl}_3$ )  $\delta$  166.7, 144.4, 142.7, 139.4, 137.9, 136.8, 135.8, 132.4, 131.2, 129.0, 128.7, 128.4, 127.6, 127.5, 127.4, 127.3, 126.9, 50.4, 32.4, 21.8, 21.6, 21.0, 20.3, 13.5; **MS** (ESI):  $m/z$  (%) = 494.2 (100)  $[\text{M} + \text{H}]^+$ . **IR**  $\nu$  (KBr,  $\text{cm}^{-1}$ ) 2952, 2925, 2866, 1675, 1597, 1456, 1440, 1354, 1312, 1184, 1165, 1077, 828, 750, 703; **HRMS** (ESI $^+$ ):  $m/z$  calcd. for  $\text{C}_{28}\text{H}_{31}\text{NO}_3\text{S}_2$  ( $[\text{M} + \text{Na}]^+$ ) 516.1643, Found: 516.1675. **Anal. calcd** for  $\text{C}_{28}\text{H}_{31}\text{NO}_3\text{S}_2$ : C 68.12, H 6.33, N 2.84. Found: C 68.34, H 6.48, N 2.71.

### 3.3. Large-scale experiments

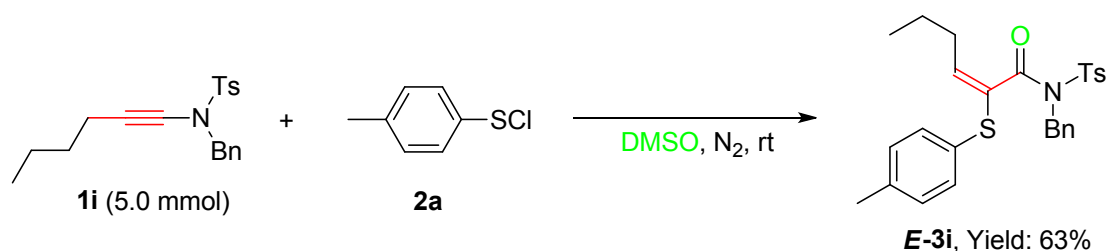

The reaction of ynamide **1i** (5.0 mmol), **2a** (2.0 equiv) and DMSO (25 mL) was carried out at rt under  $\text{N}_2$  atmosphere for 2 h, and the progress of the reaction was monitored by TLC analysis. The

reaction mixture was quenched by adding EtOAc (30 mL) and water (30 mL). The water phase was extracted twice with EtOAc (20 mL), and the combined organic layers were washed by brine, dried over Na<sub>2</sub>SO<sub>4</sub>. Filtration and concentration gave the crude product, which was purified by chromatography on silica gel (PE/EtOAc, 10:1) to afford **E-3i** (1.50 g, 63% yield) as a white solid.

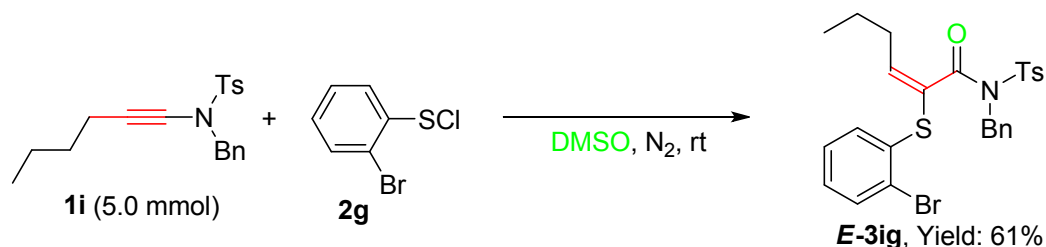

The reaction of ynamide **1i** (5.0 mmol), **2g** (2.0 equiv) and DMSO (25 mL) was carried out at rt under N<sub>2</sub> atmosphere for 2 h, and the progress of the reaction was monitored by TLC analysis. The reaction mixture was quenched by adding EtOAc (30 mL) and water (30 mL). The water phase was extracted twice with EtOAc (20 mL), and the combined organic layers were washed by brine, dried over Na<sub>2</sub>SO<sub>4</sub>. Filtration and concentration gave the crude product, which was purified by chromatography on silica gel (PE/EtOAc, 10:1) to afford **E-3ig** (1.66 g, 61% yield) as a white solid.

#### 3.4. Synthesis of $\alpha$ -selanyl acrylamides

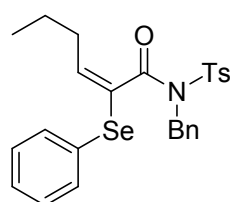

In a 10 mL flame-dried Schlenk tube were placed ynamide **1i** (0.3 mmol), PhSeCl (2.0 equiv) and DMSO (2.0 mL) under nitrogen condition. The reaction mixture had been stirred at rt for 1 hour while was monitored with TLC analysis. The reaction mixture was quenched by adding EtOAc and water. The combined organic layers were washed by brine, dried over Na<sub>2</sub>SO<sub>4</sub>, concentrated under reduced pressure. The residue was purified by silica gel column chromatography to give the desired product (**E**)-*N*-benzyl-2-(phenylselanyl)-*N*-tosylhex-2-enamide (**E-4ia**): 86.2 mg, 56% yield; white solid; mp 68-69 °C (*n*-hexane/ethylacetate); <sup>1</sup>H NMR (400 MHz, CDCl<sub>3</sub>)  $\delta$  7.69 (d, *J* = 8.4 Hz, 2 H), 7.36-7.22 (m, 7 H), 7.19-7.10 (m, 5 H), 6.14 (t, *J* = 7.6 Hz, 1 H), 5.06 (s, 2 H), 2.37 (s, 3 H), 1.68 (q, *J* = 7.6 Hz, 2 H), 1.22-1.11 (m, 2 H), 0.73 (t, *J* = 7.2 Hz, 3 H); <sup>13</sup>C NMR (100 MHz, CDCl<sub>3</sub>)  $\delta$  167.6, 147.2, 144.5, 136.6, 135.7, 132.0, 129.9, 129.2, 129.0, 128.5, 128.4, 127.6, 127.5, 127.2, 121.4, 50.2, 33.3, 21.6, 21.5, 13.5; MS (ESI):*m/z* (%) = 514.2 (100) [M + H]<sup>+</sup>.

**IR**  $\nu$  (KBr,  $\text{cm}^{-1}$ ) 2964, 2935, 1689, 1346, 1182, 1163, 1120, 856, 740; **HRMS** (ESI<sup>+</sup>):  $m/z$  calcd. for  $\text{C}_{26}\text{H}_{27}\text{NO}_3\text{SSe}$  ( $[\text{M}+\text{Na}]^+$ ) 536.0775, Found: 536.0805. **Anal. calcd** for  $\text{C}_{26}\text{H}_{27}\text{NO}_3\text{SSe}$ : C 60.93, H 5.31, N 2.73. Found: C 60.97, H 5.53, N 2.87.

### 3.5. Synthesis of $\alpha$ -tellanyl acrylamides.

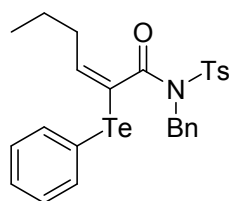

1) Preparation of the phenyltelluryl bromide solution: Bromine (101.6 mg, 0.6 mmol) was added to a flask containing diphenyl ditelluride (245.5 mg, 0.6 mmol) in 1,2-dichloroethane (1.0 mL) at 0 °C. The reaction mixture was stirred for 15 min at this temperature. 2) In a 10 mL flame-dried Schlenk tube were placed ynamide **1i** (0.3 mmol), PhTeBr (2.0 equiv, in DCE) and DMSO (2.0 mL) under nitrogen condition. The reaction mixture had been stirred at rt for 1 hour while was monitored with TLC analysis. The reaction mixture was quenched by adding EtOAc and water. The combined organic layers were washed by brine, dried over  $\text{Na}_2\text{SO}_4$ , concentrated under reduced pressure. The residue was purified by silica gel column chromatography to give the desired product (*E*)-*N*-benzyl-2-(phenyltellanyl)-*N*-tosylhex-2-enamide (**E-5ia**): 69.4 mg, 41% yield; yellow oil; **<sup>1</sup>H NMR** (400 MHz,  $\text{CDCl}_3$ )  $\delta$  7.66-7.60 (m, 2 H), 7.56 (d,  $J = 8.4$  Hz, 2 H), 7.30-7.18 (m, 8 H), 7.13 (t,  $J = 7.6$  Hz, 2 H), 5.91 (t,  $J = 6.8$  Hz, 1 H), 4.89 (s, 2 H), 2.41 (s, 3 H), 2.15 (q,  $J = 7.2$  Hz, 2 H), 1.2 6-1.13 (m, 2 H), 0.77 (t,  $J = 7.2$  Hz, 3 H); **<sup>13</sup>C NMR** (100 MHz,  $\text{CDCl}_3$ )  $\delta$  170.8, 147.7, 144.5, 138.3, 136.5, 136.3, 129.4, 129.3, 128.5, 128.4, 128.1, 127.7, 113.9, 113.8, 50.1, 38.0, 21.6, 21.3, 13.8; **MS** (ESI): $m/z$  (%) = 564.2 (100)  $[\text{M} + \text{H}]^+$ . **IR**  $\nu$  (KBr,  $\text{cm}^{-1}$ ) 1690, 1666, 1594, 1535, 1495, 1444, 1281, 1169, 879, 745; **HRMS** (ESI<sup>+</sup>):  $m/z$  calcd. for  $\text{C}_{26}\text{H}_{27}\text{NO}_3\text{STe}$  ( $[\text{M}+\text{Na}]^+$ ) 586.0672, Found: 586.0706.

### 4. Experiment for Mechanistic Study

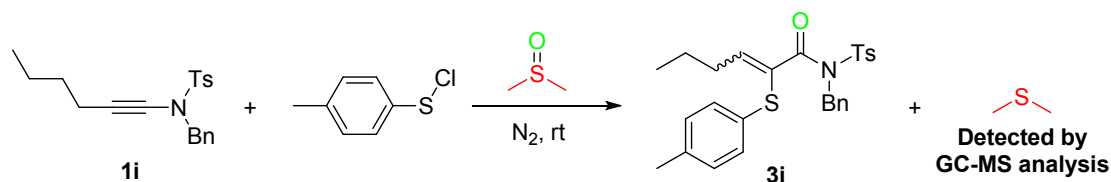

In a 10 mL flame-dried Schlenk tube were placed ynamide **1i** (0.3 mmol), *p*-tolylsulfenylchloride **2a** (2.0 equiv) and DMSO (2.0 mL) under nitrogen condition. The reaction mixture was stirred at rt for 1 hour while being monitored with TLC analysis. The reaction mixture was detected by GC-MS analysis.

**File:** D:\MassHunter\shoudong\huanghai1130.D  
**Operator:**  
**Acquired:** 30 Nov 2015 09:13 using AcqMethod huanghai.m  
**Instrument:** Agilent 5977 GCMS  
**Sample Name:**  
**Misc Info:**  
**Vial Number:** 1



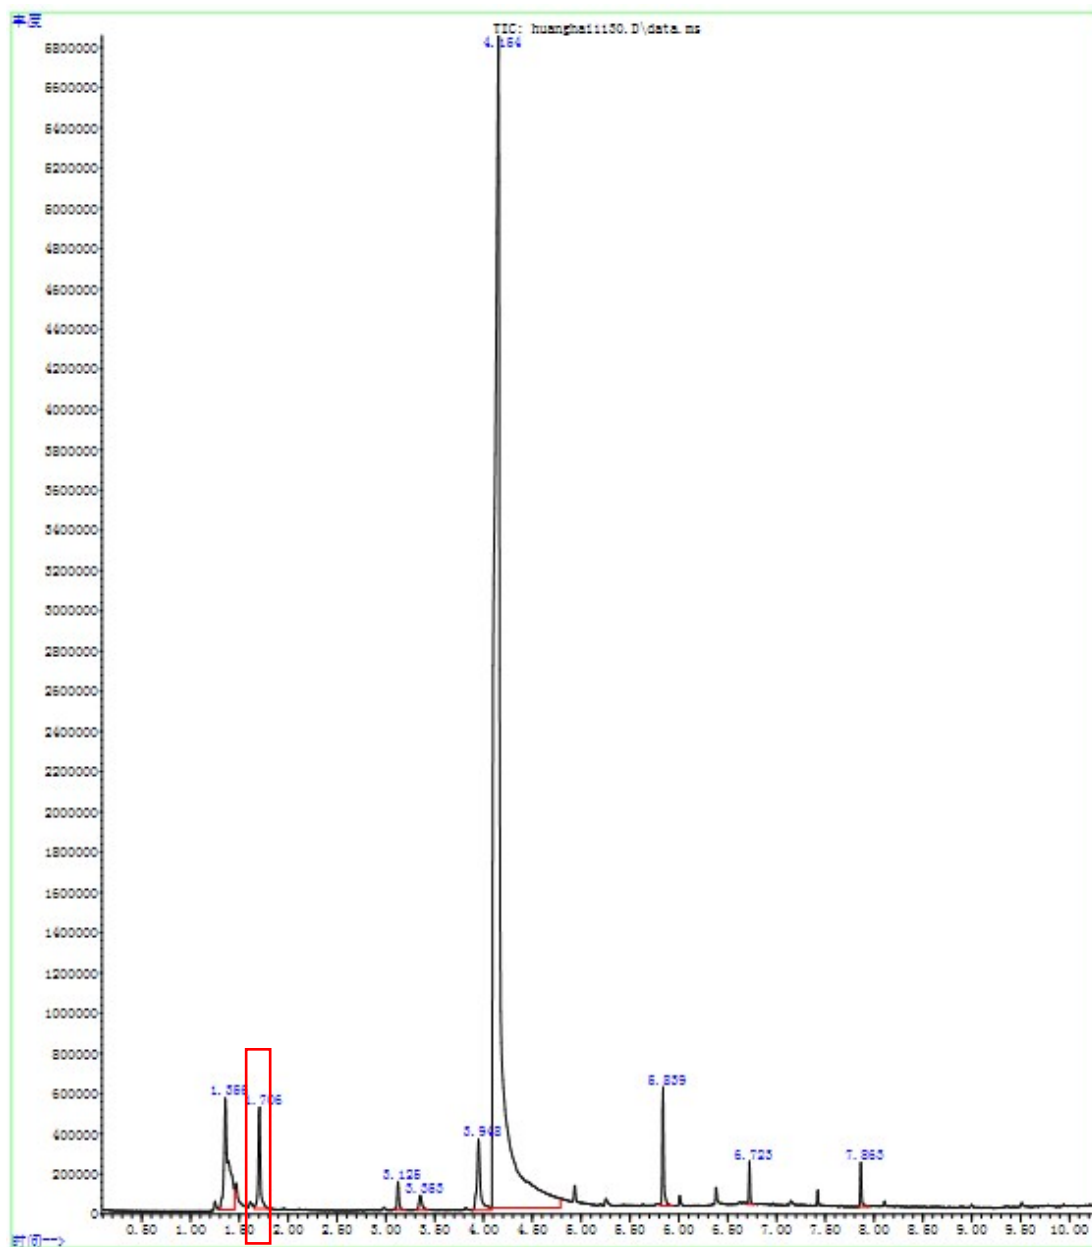

未知质谱图基于顶点

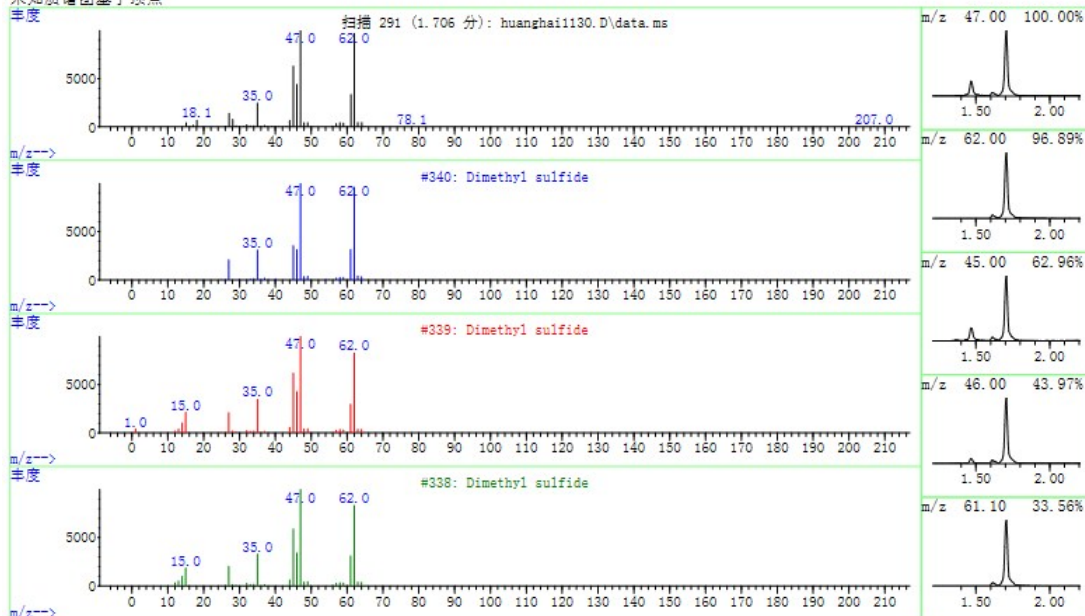

Data File: D:\YPCS\huanghai1130.D

样品:

|                    |                  |                 |           |
|--------------------|------------------|-----------------|-----------|
| 峰编号: 2             | 1.706 分钟处        | 面积: 812772      | 面积 % 2.64 |
| 每个谱库中 3 个最匹配的记录.   |                  |                 |           |
|                    | Ref\#            | CAS\#           | 匹配度       |
| C:\database\DEMO.L |                  |                 |           |
| 1                  | Dimethyl sulfide | 340 000075-18-3 | 97        |
| 2                  | Dimethyl sulfide | 339 000075-18-3 | 96        |
| 3                  | Dimethyl sulfide | 338 000075-18-3 | 95        |

Signal Number: 2    1.706 Min    Area: 812772 Area %: 2.64

| Three best match records in date base | Ref#             | CAS# | Matching degree |
|---------------------------------------|------------------|------|-----------------|
| C:\database\DEMO.L                    |                  |      |                 |
| 1                                     | Dimethyl sulfide | 340  | 000075-18-3 97  |
| 2                                     | Dimethyl sulfide | 339  | 000075-18-3 96  |
| 3                                     | Dimethyl sulfide | 338  | 000075-18-3 95  |

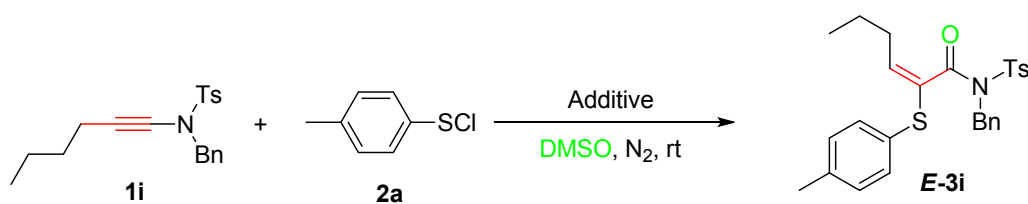

Additive: **TEMPO**, **E-3i** Yield: 60%  
 Additive: **BHT**, **E-3i** Yield: 63%

In a 10 mL flame-dried Schlenk tube were placed ynamide **1a** (0.3 mmol), *p*-tolylsulfenylchloride **2a** (2.0 equiv), Additive (2.0 equiv) and DMSO (2.0 mL) under nitrogen condition. The reaction mixture was stirred at rt for 1 hour while being monitored with TLC analysis. The reaction mixture was quenched by adding EtOAc and water. The combined organic layers were washed by brine, dried over Na<sub>2</sub>SO<sub>4</sub>, and concentrated under reduced pressure. The residue was purified by silica gel column chromatography to give **E-3i**.

## ***References***

- [1] Y. Zhang, R. P. Hsung, M. R. Tracey, K. C. M. Kurtz, E. L. Vera, *Org. Lett.* **2004**, *6*, 1151.
- [2] H. Hofmeister, K. Annen, H. Laurent, R. Wiechert, *Angew. Chem.* **1984**, *96*, 720; *Angew. Chem., Int. Ed.* **1984**, *23*, 727.
- [3] a) M. Iwasaki, T. Fujii, A. Yamamoto, K. Nakajima, Y. Nishihara, *Chem. Asian J.* **2014**, *9*, 58;  
b) M. Iwasaki, T. Fujii, K. Nakajima, Y. Nishihara, *Angew. Chem.* **2014**, *126*, 14100; *Angew. Chem. Int. Ed.* **2014**, *53*, 13880.

**NMR Spectra**

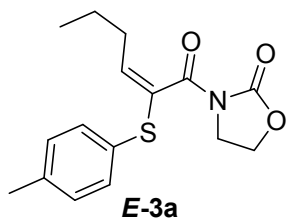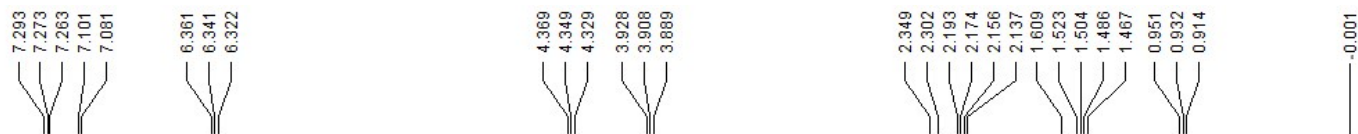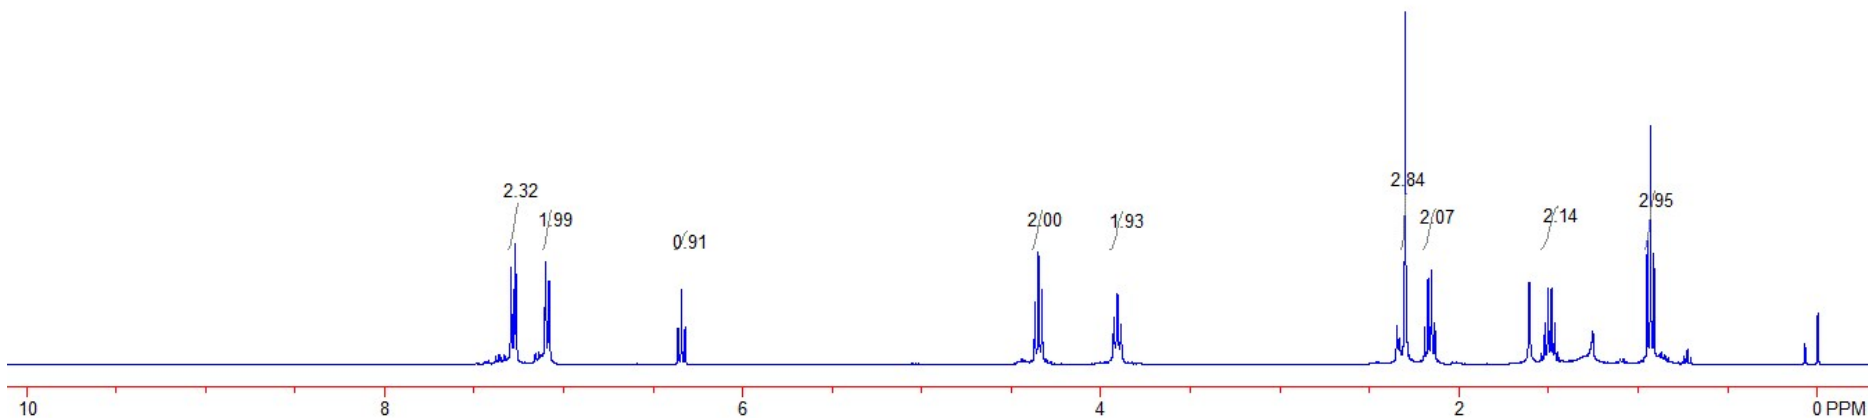

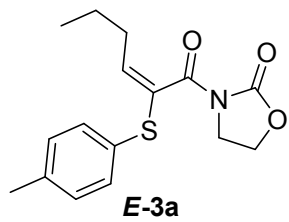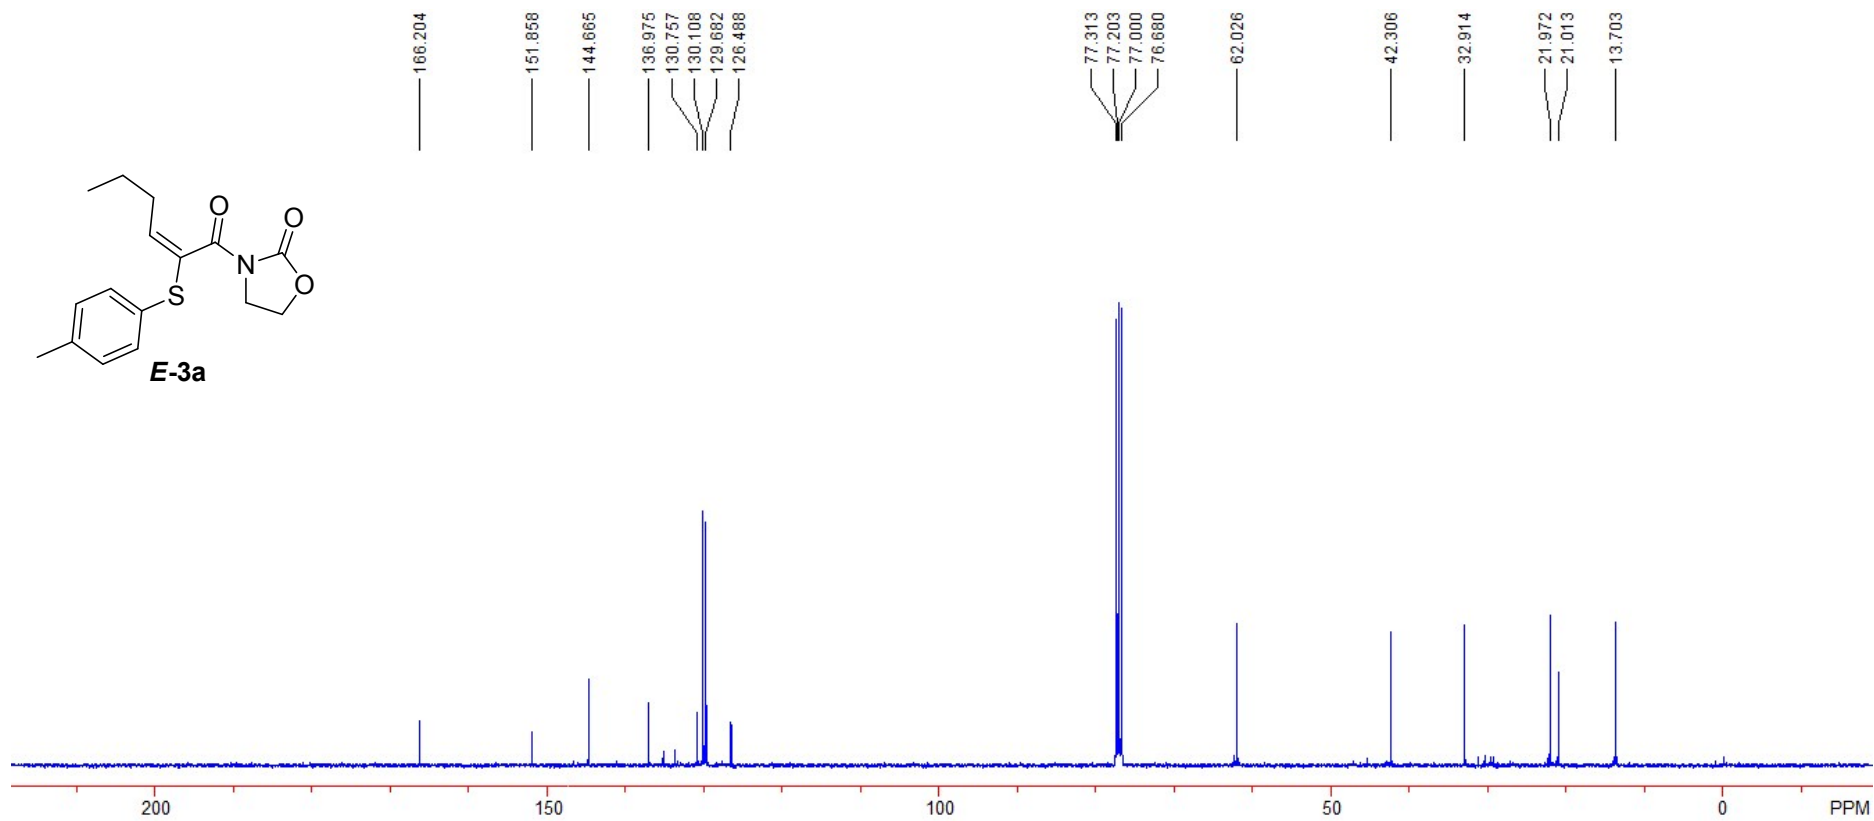

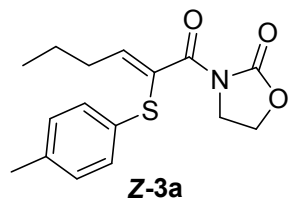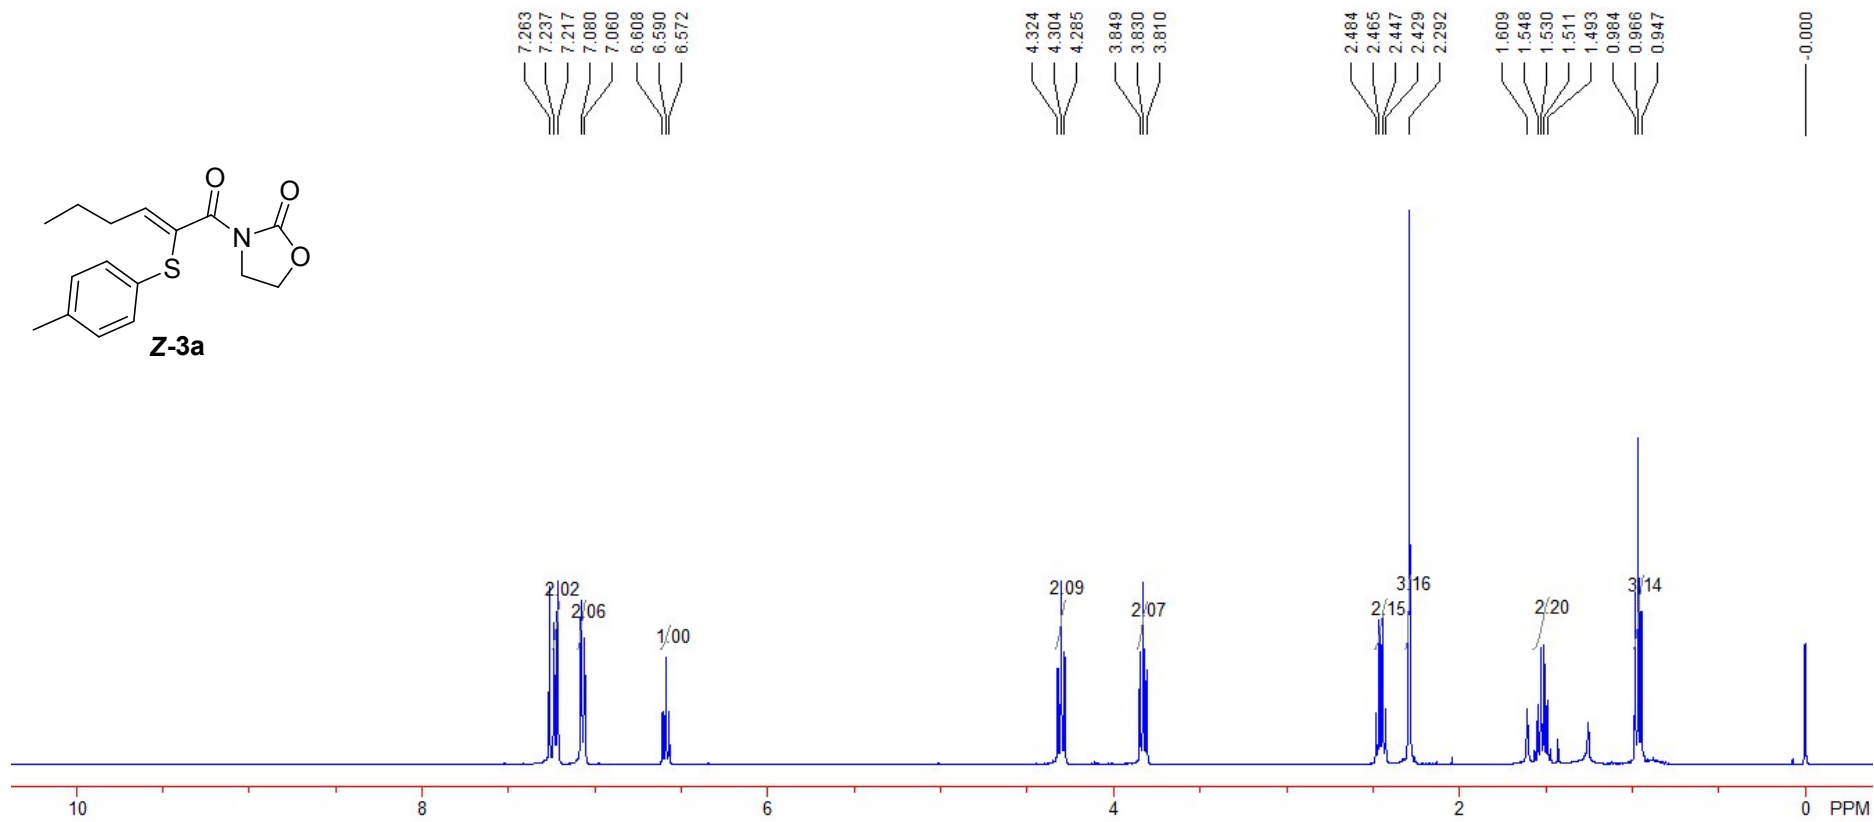

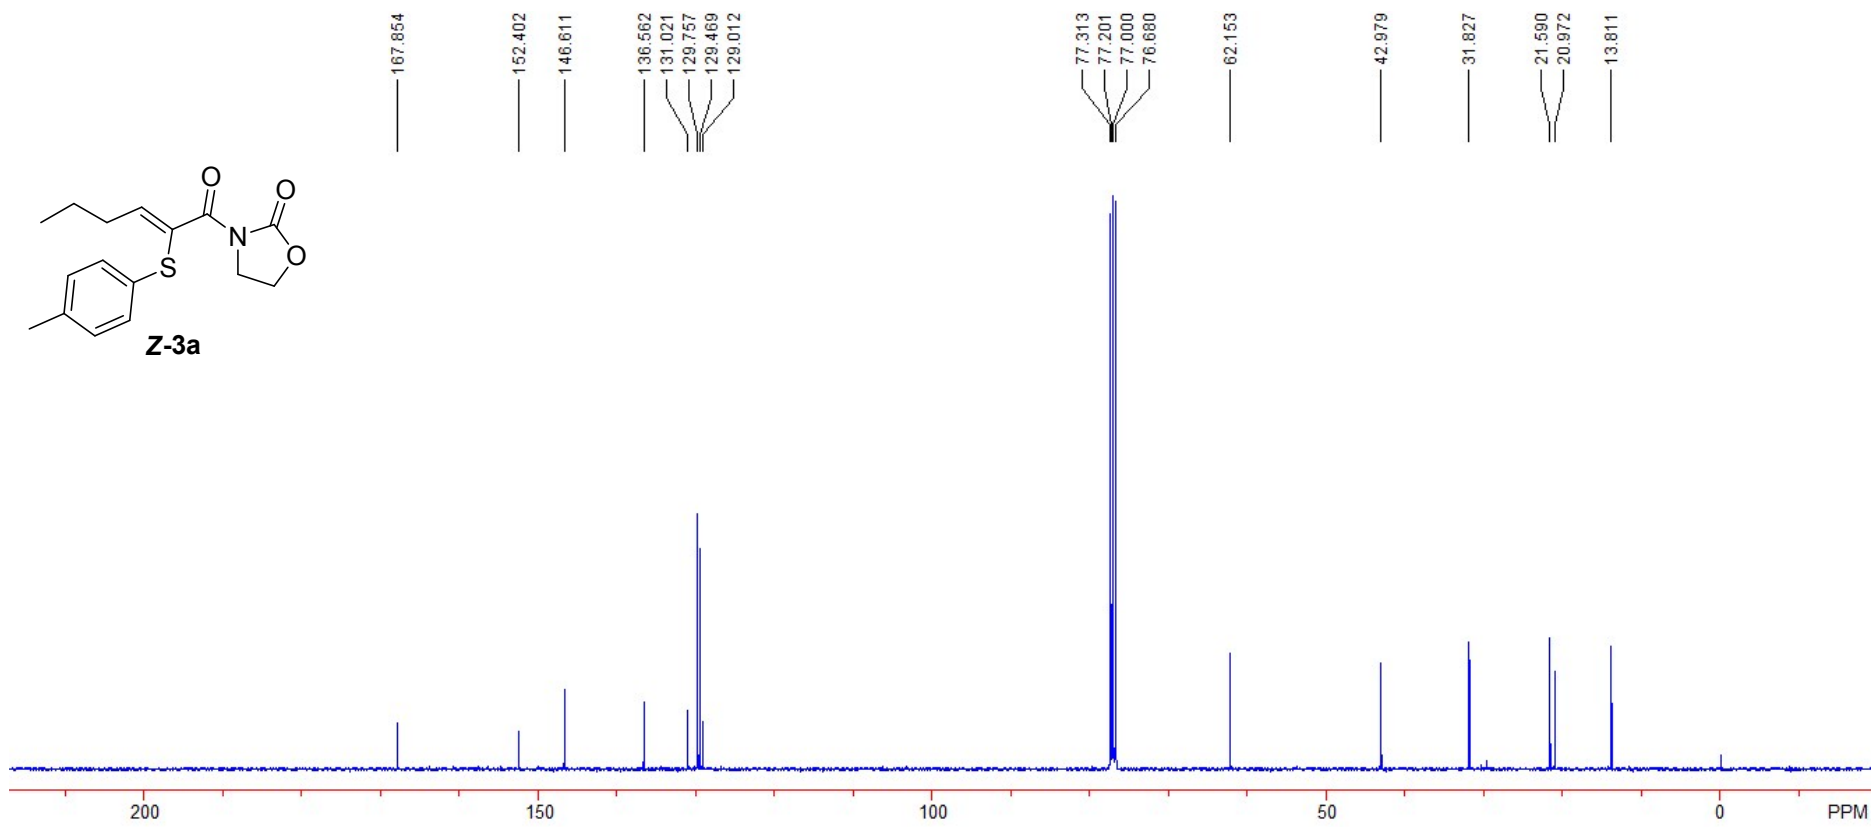

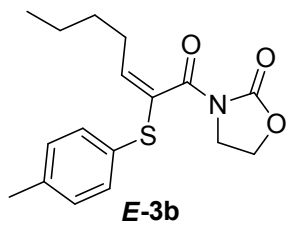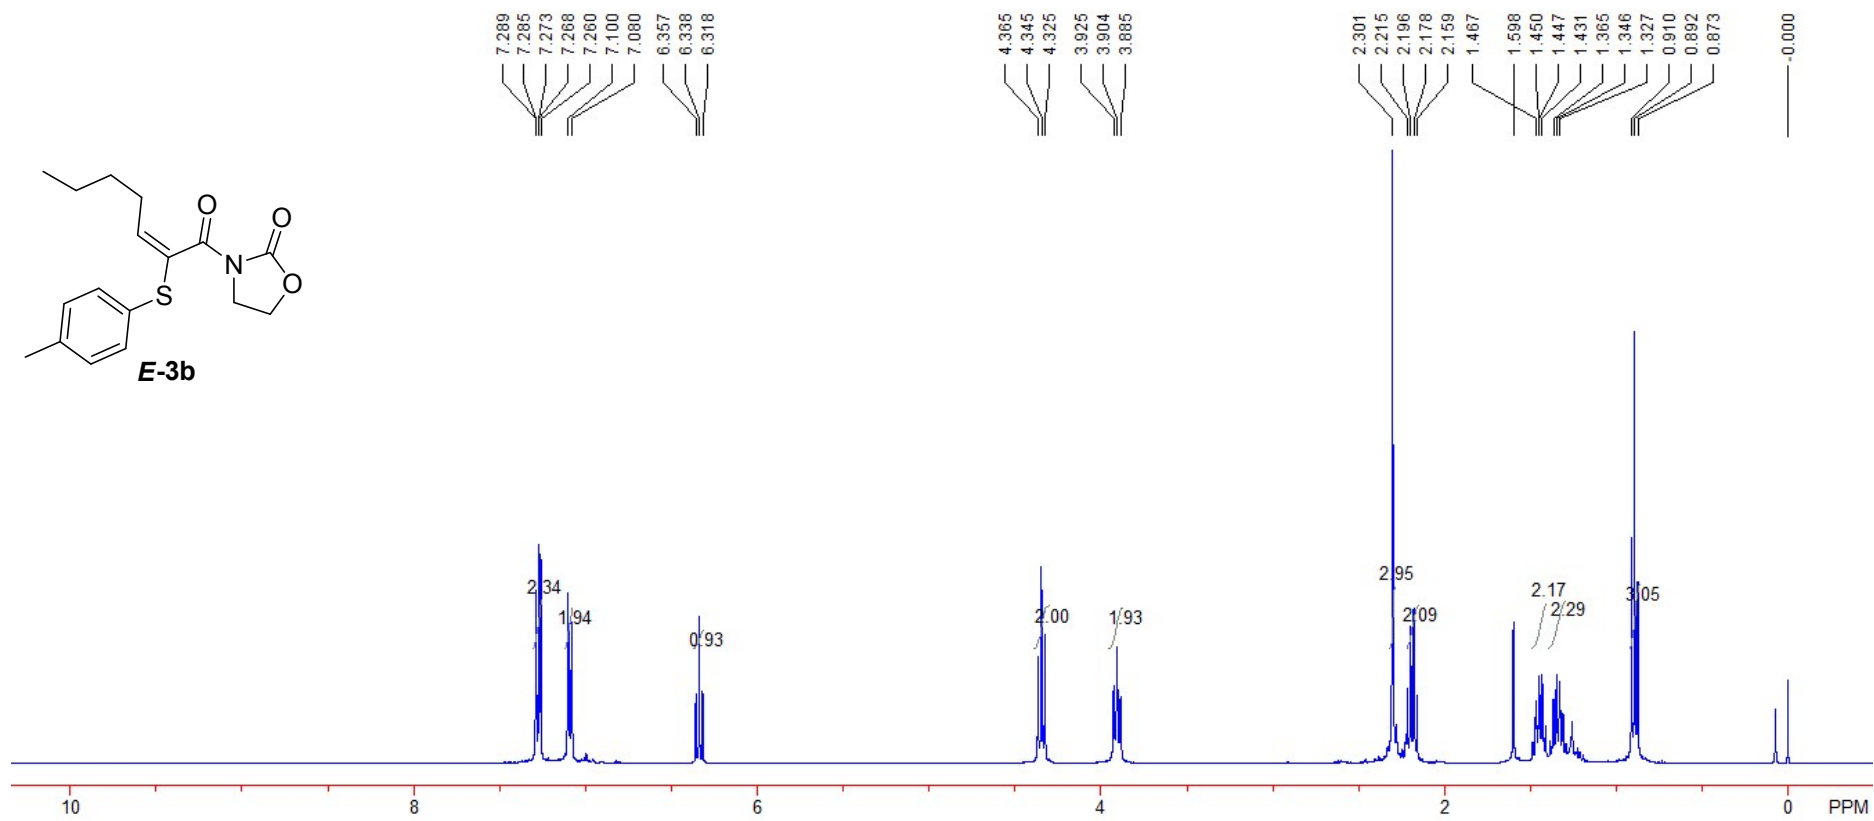



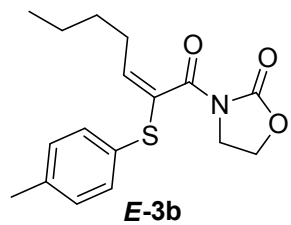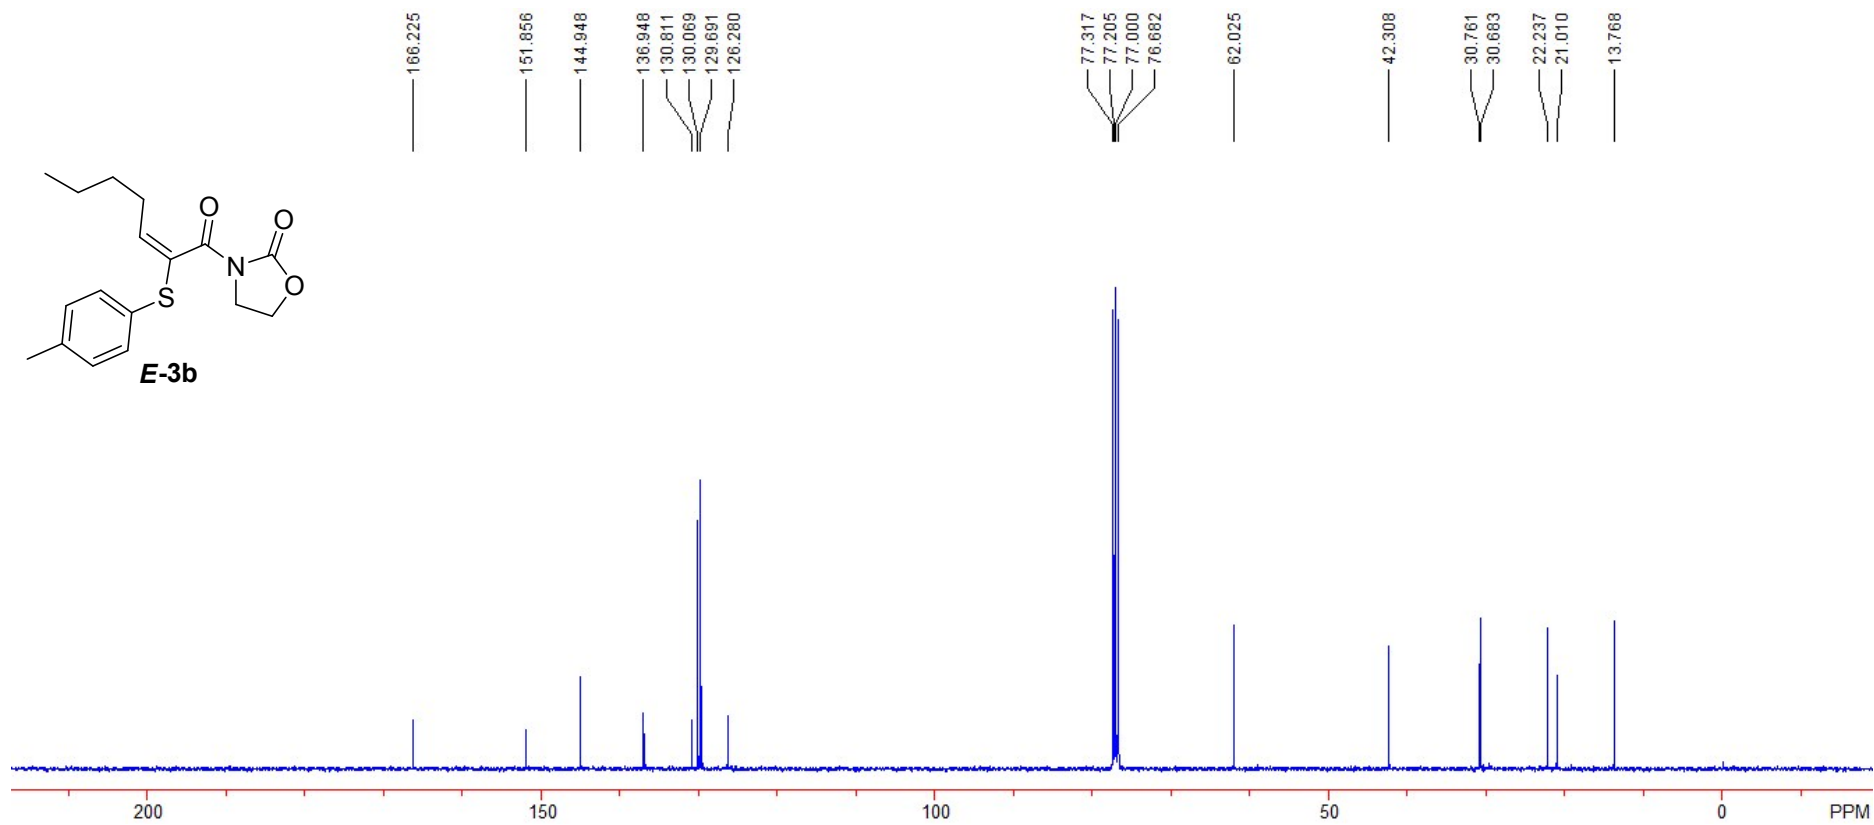

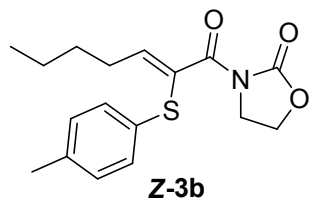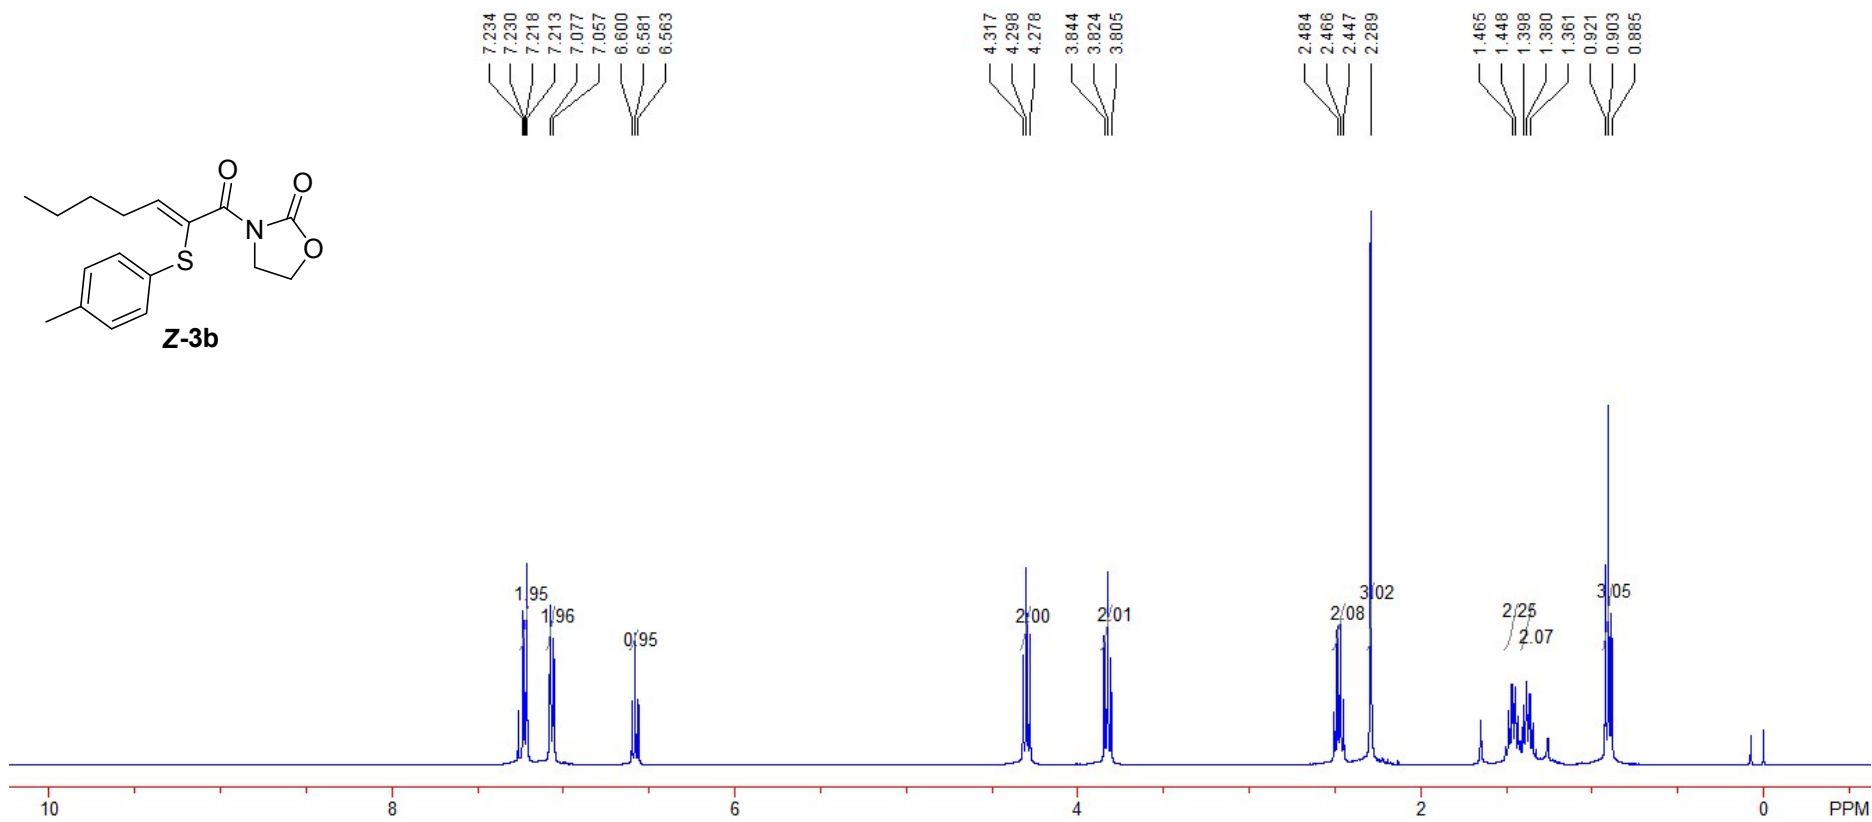

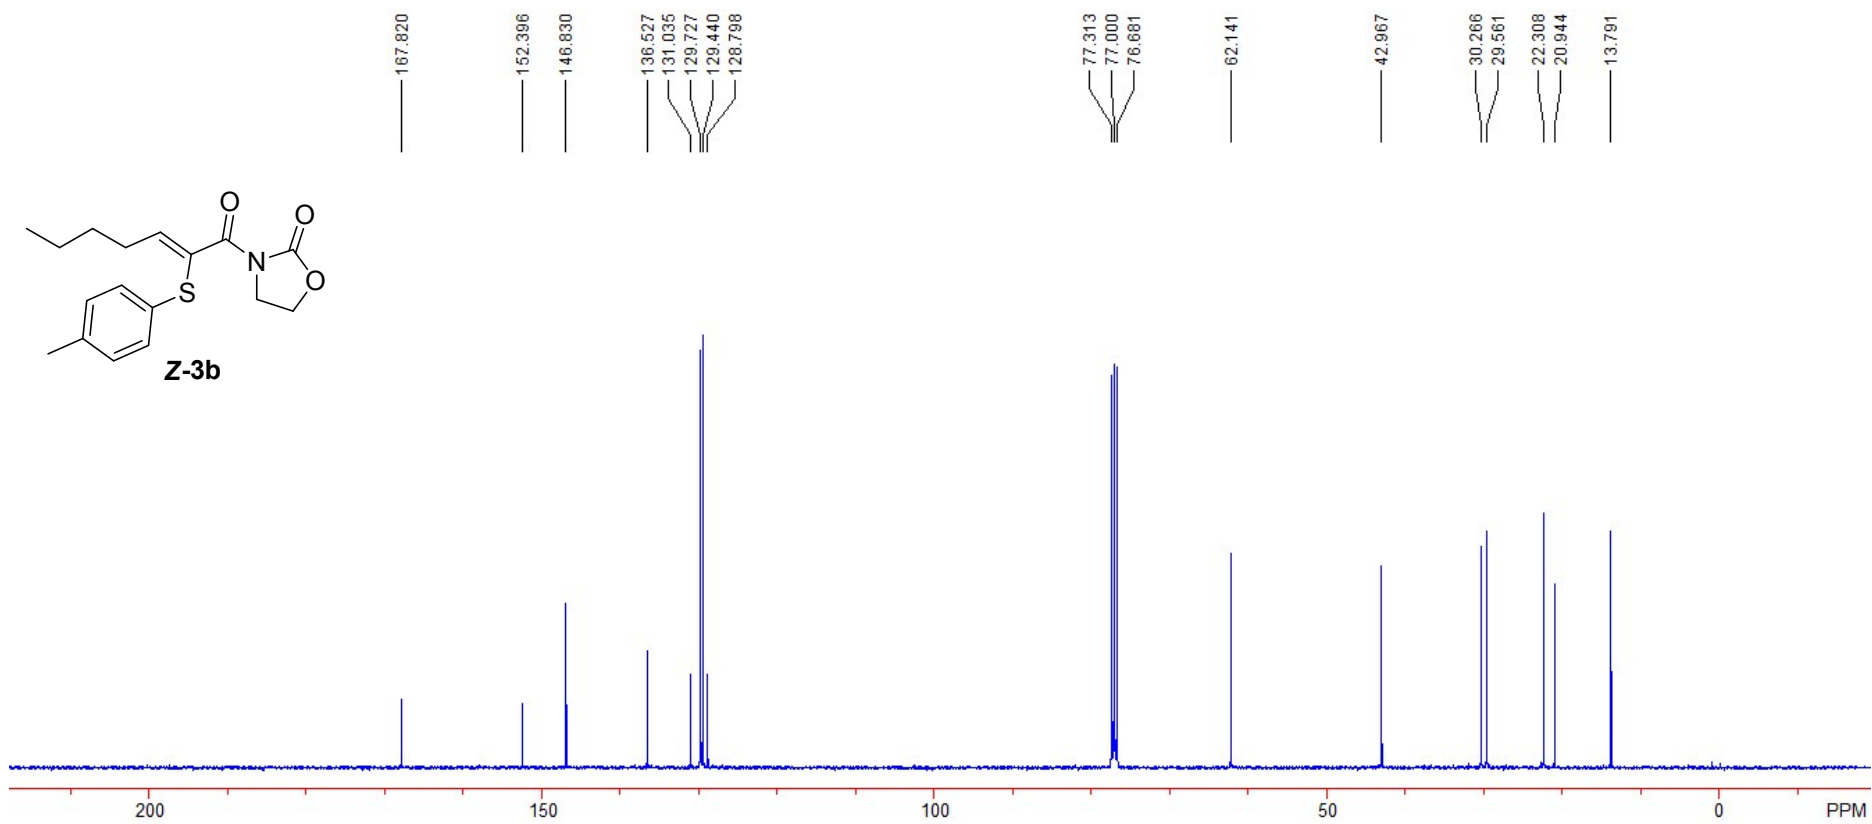

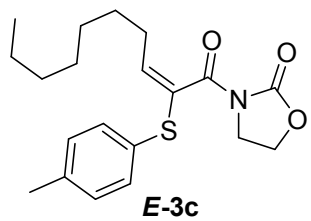

7.289  
7.269  
7.262  
7.099  
7.079

6.361  
6.342  
6.322

4.369  
4.349  
4.329  
3.929  
3.909  
3.889

2.302  
2.206  
2.187  
2.168  
2.149

1.592  
1.474  
1.457  
1.439  
1.432  
1.294  
1.265  
0.894  
0.878  
0.860

-0.000  
-0.002

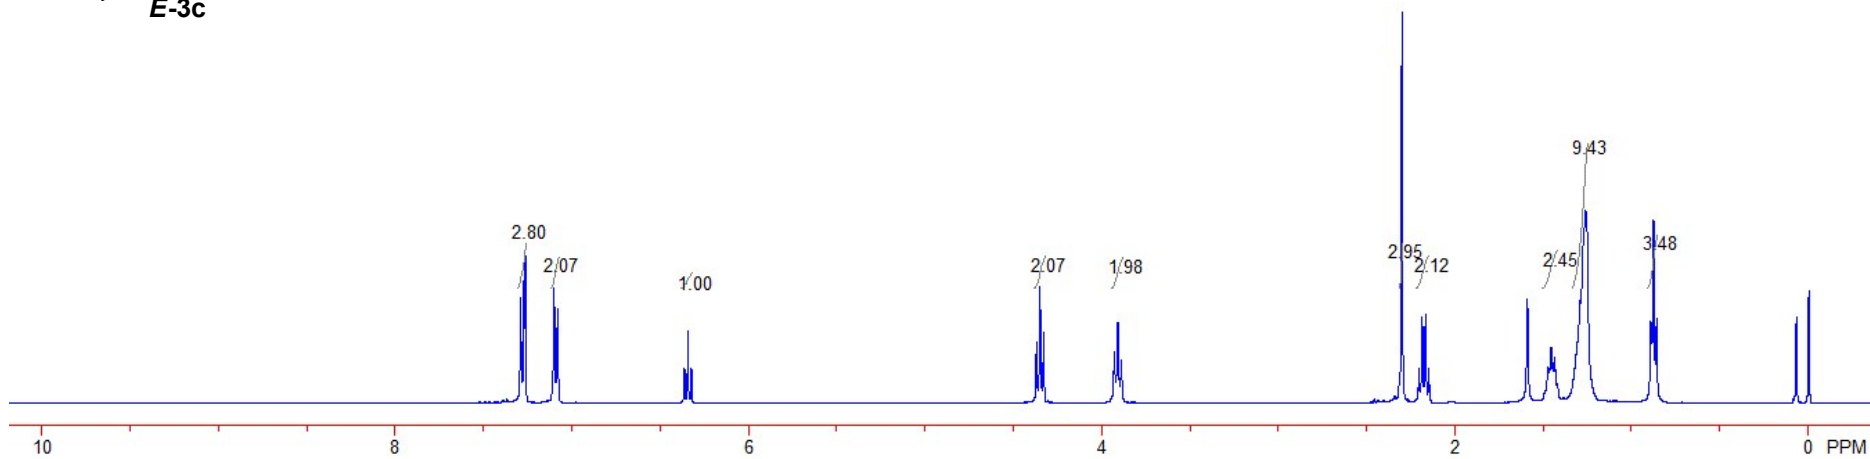

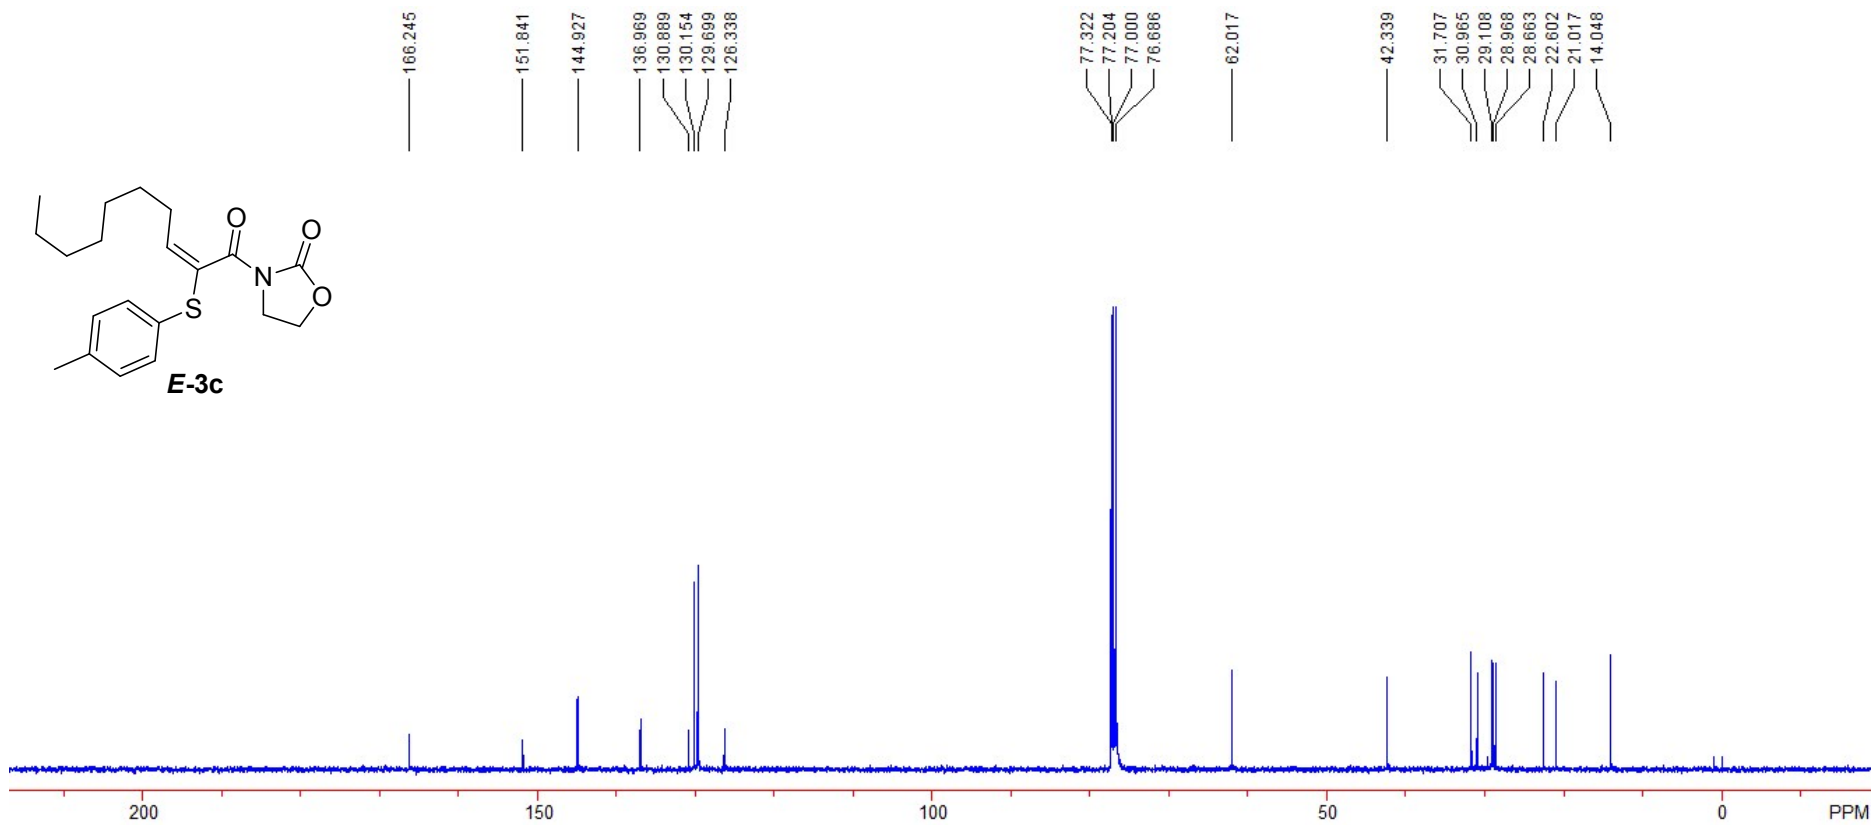

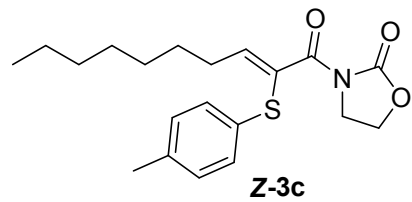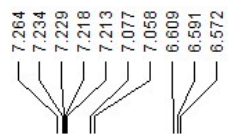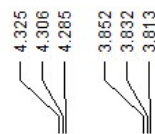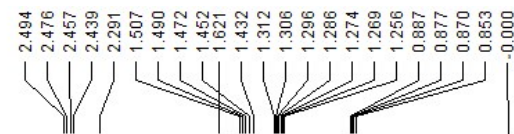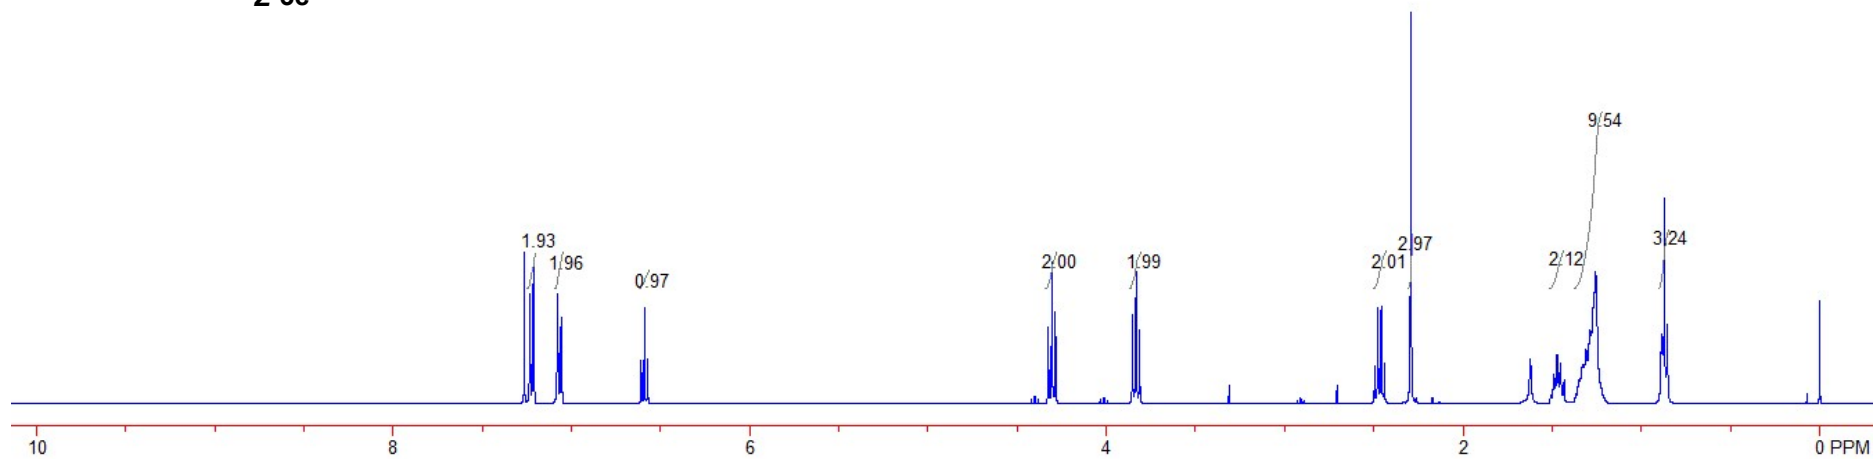

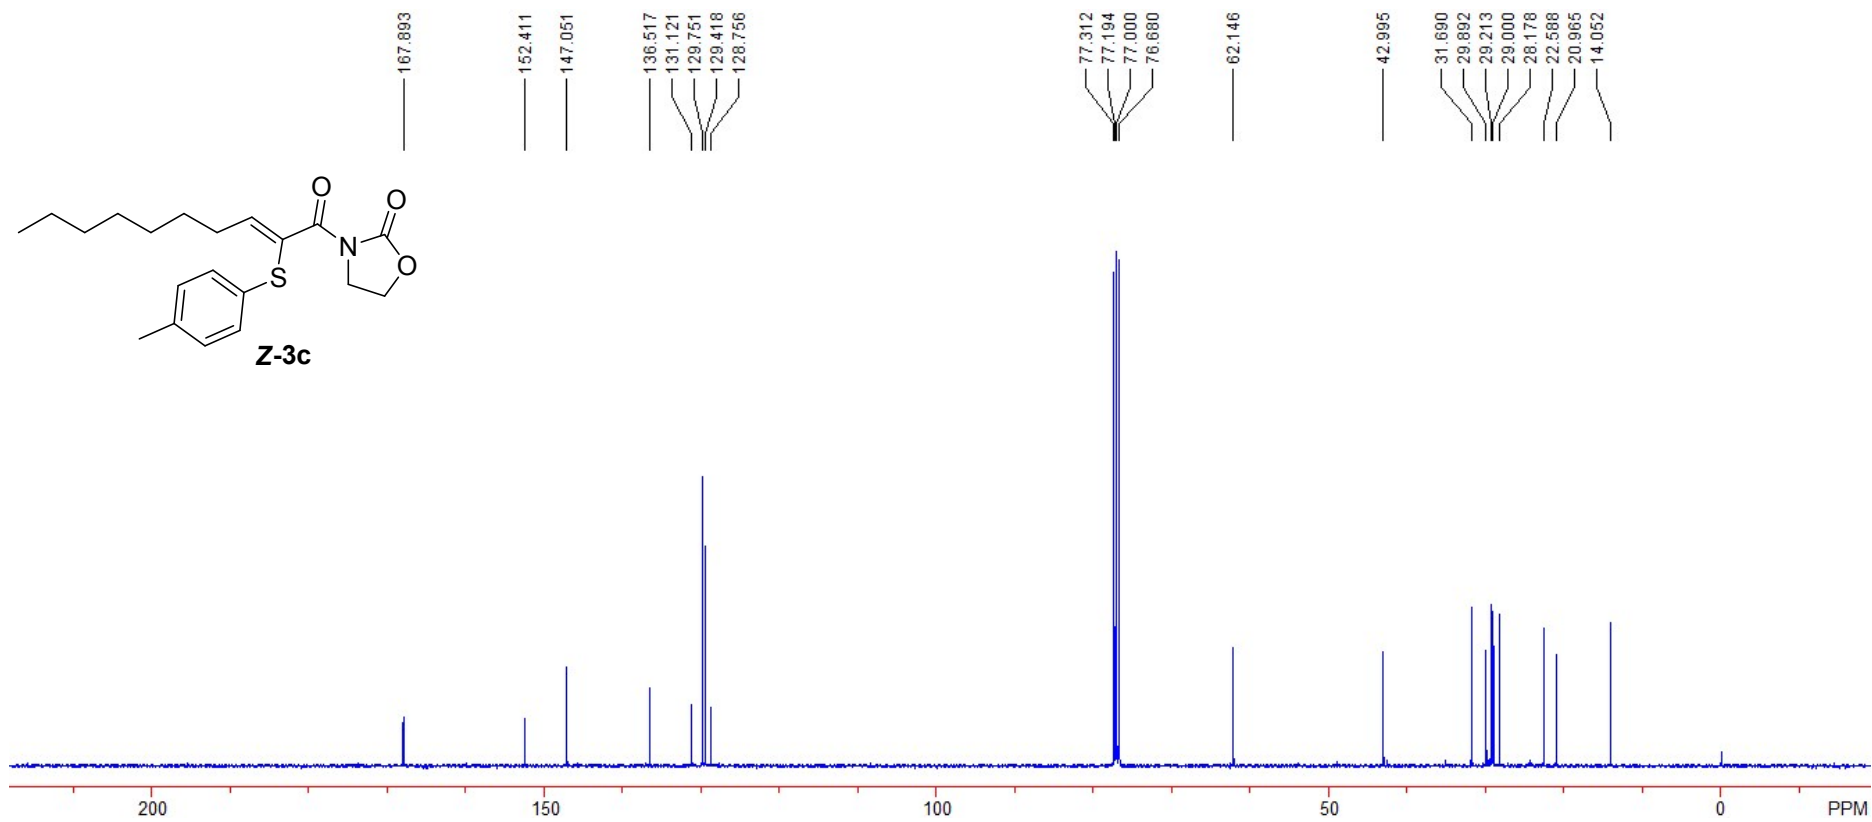

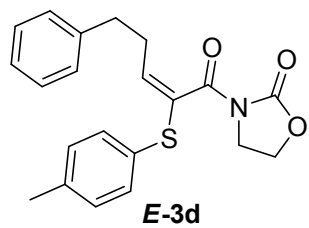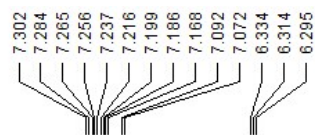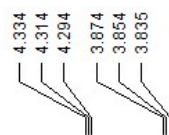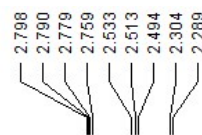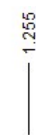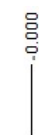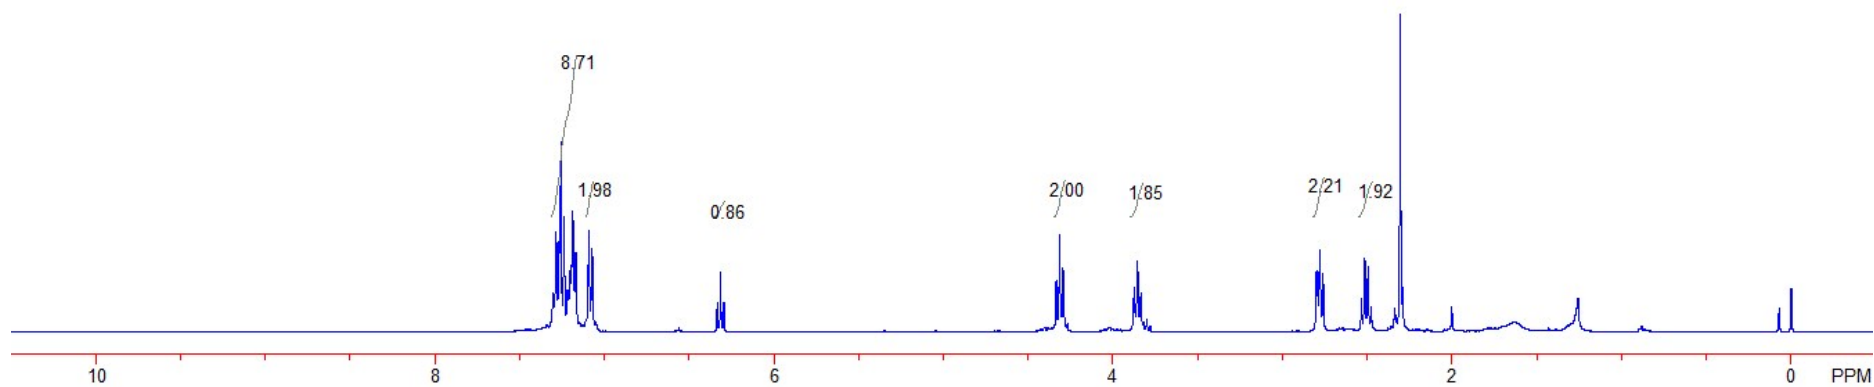



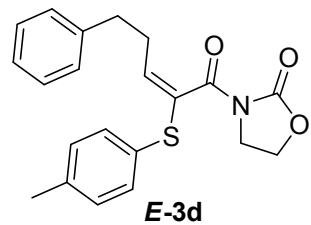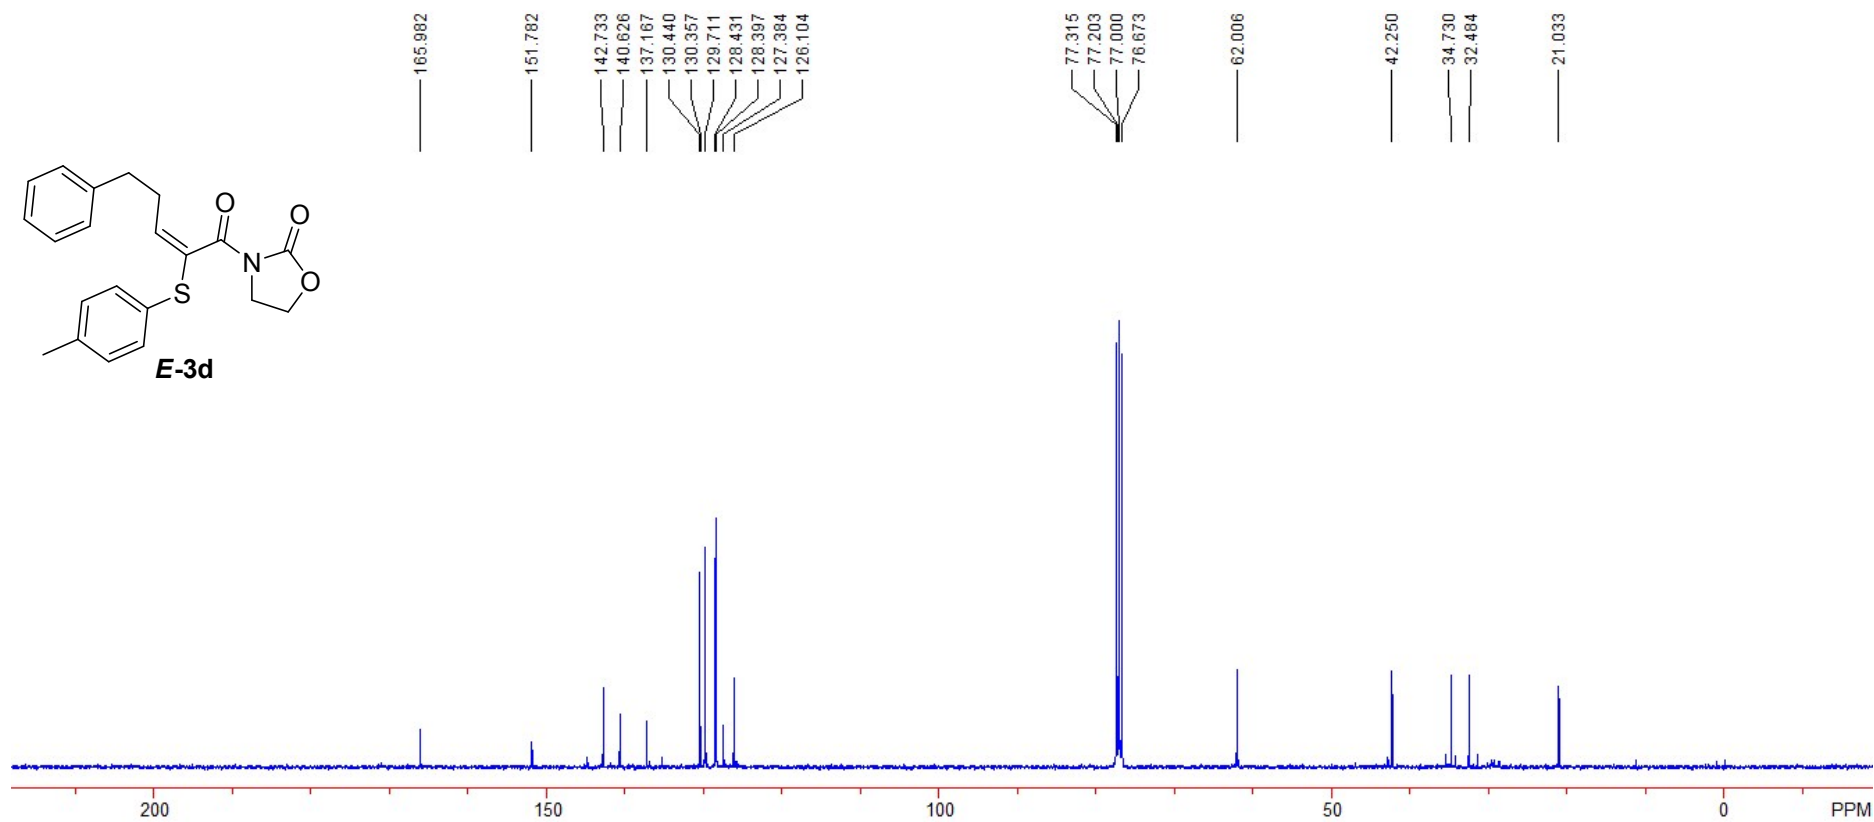

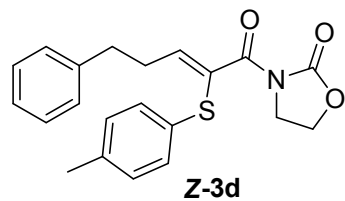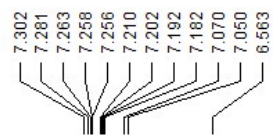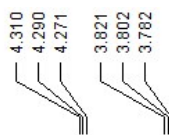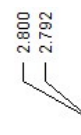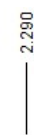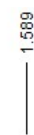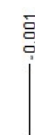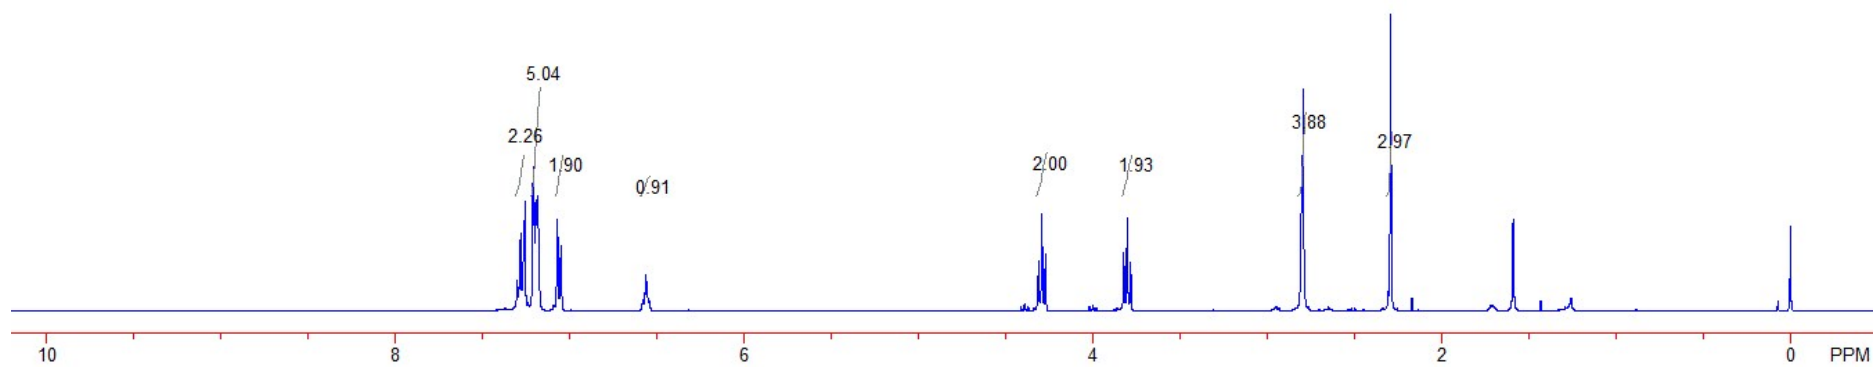

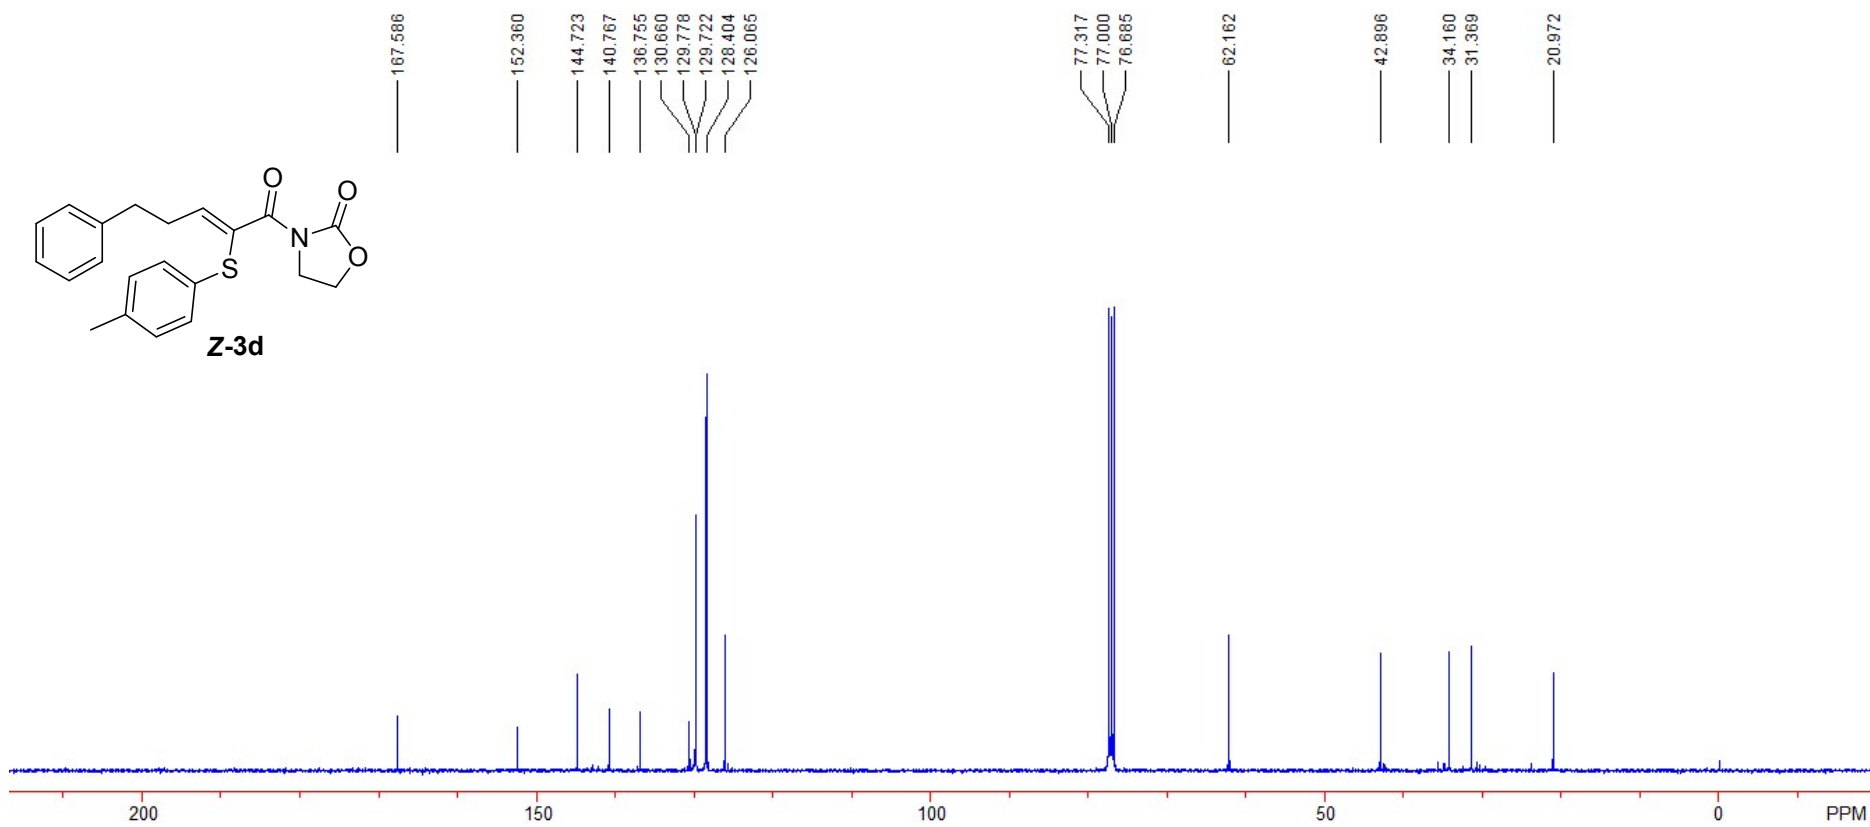

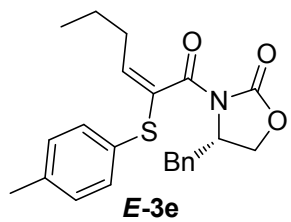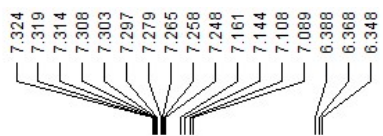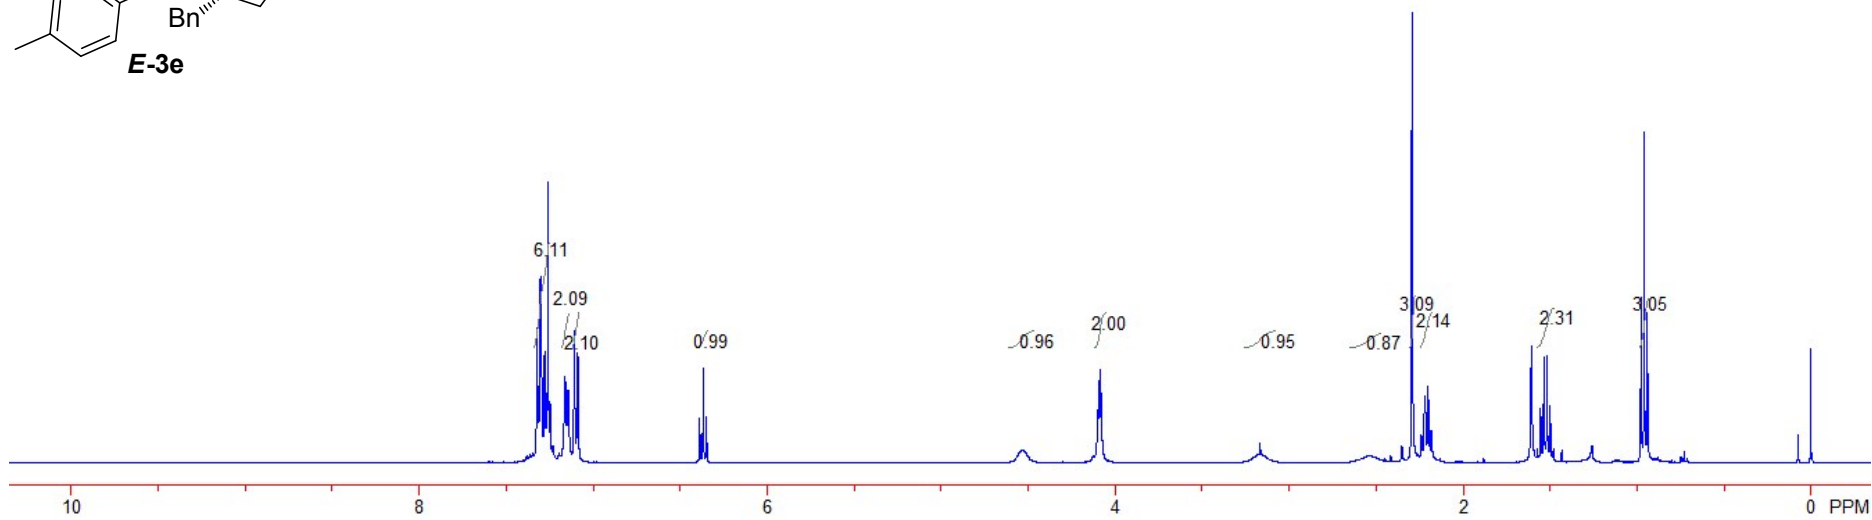

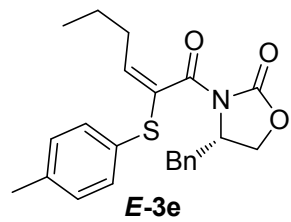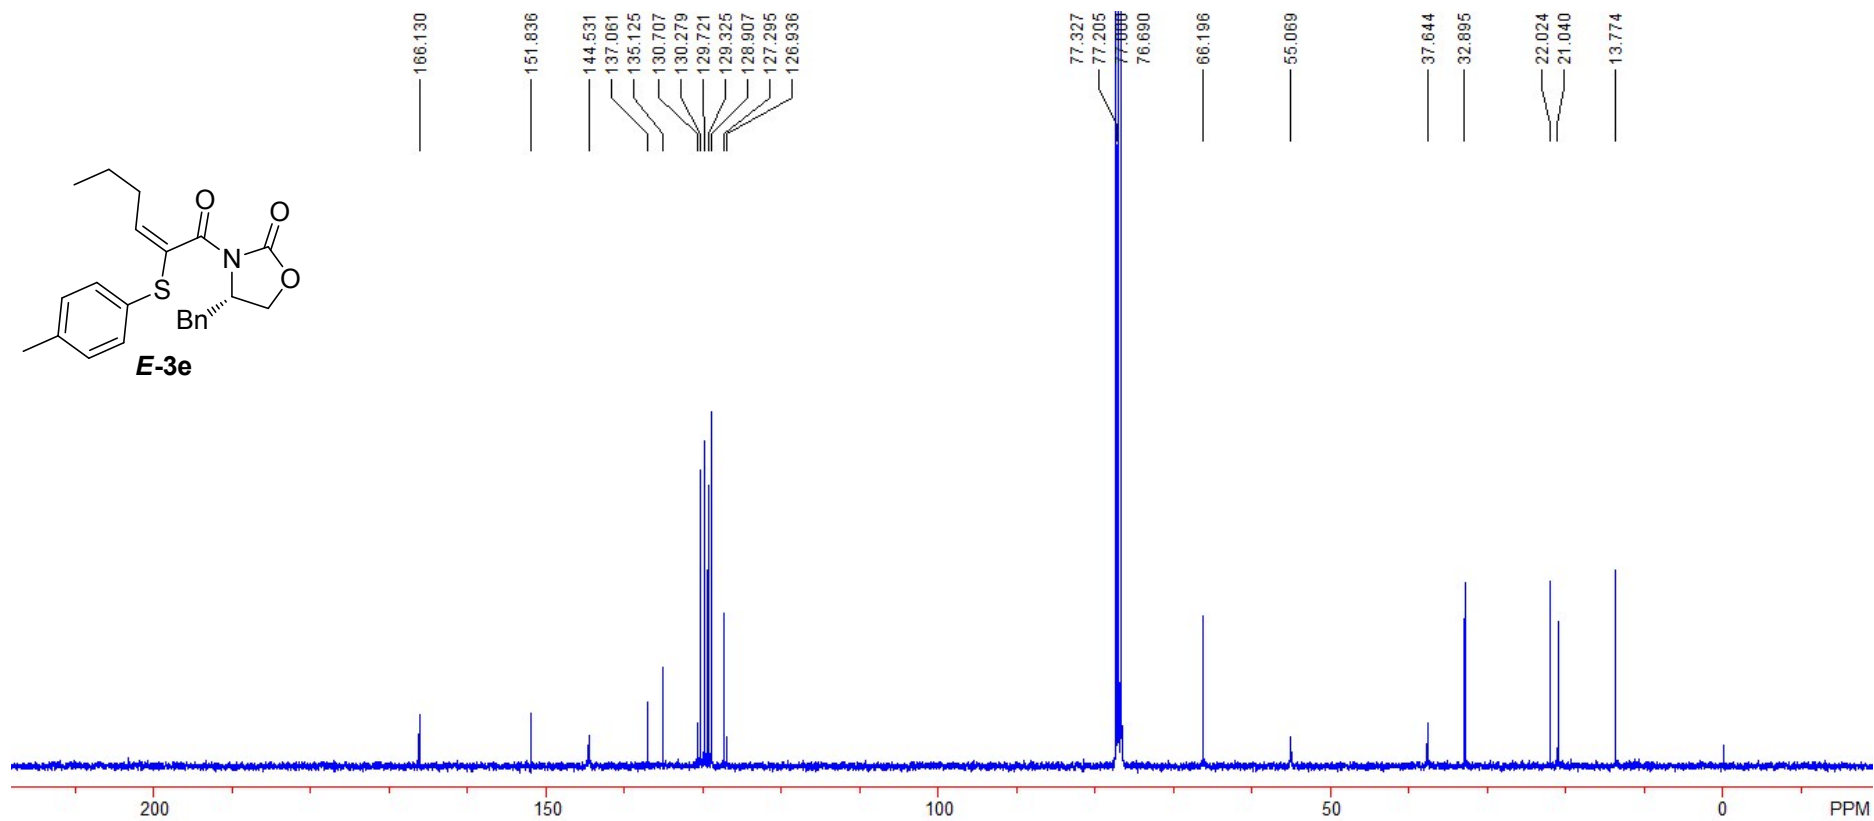

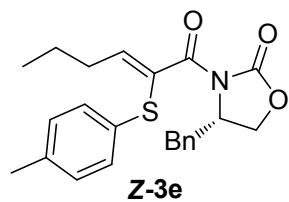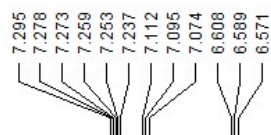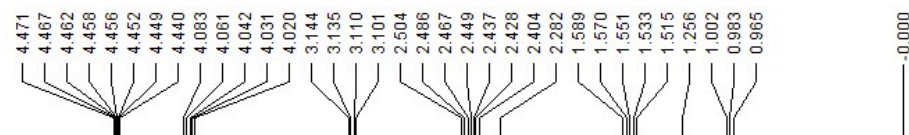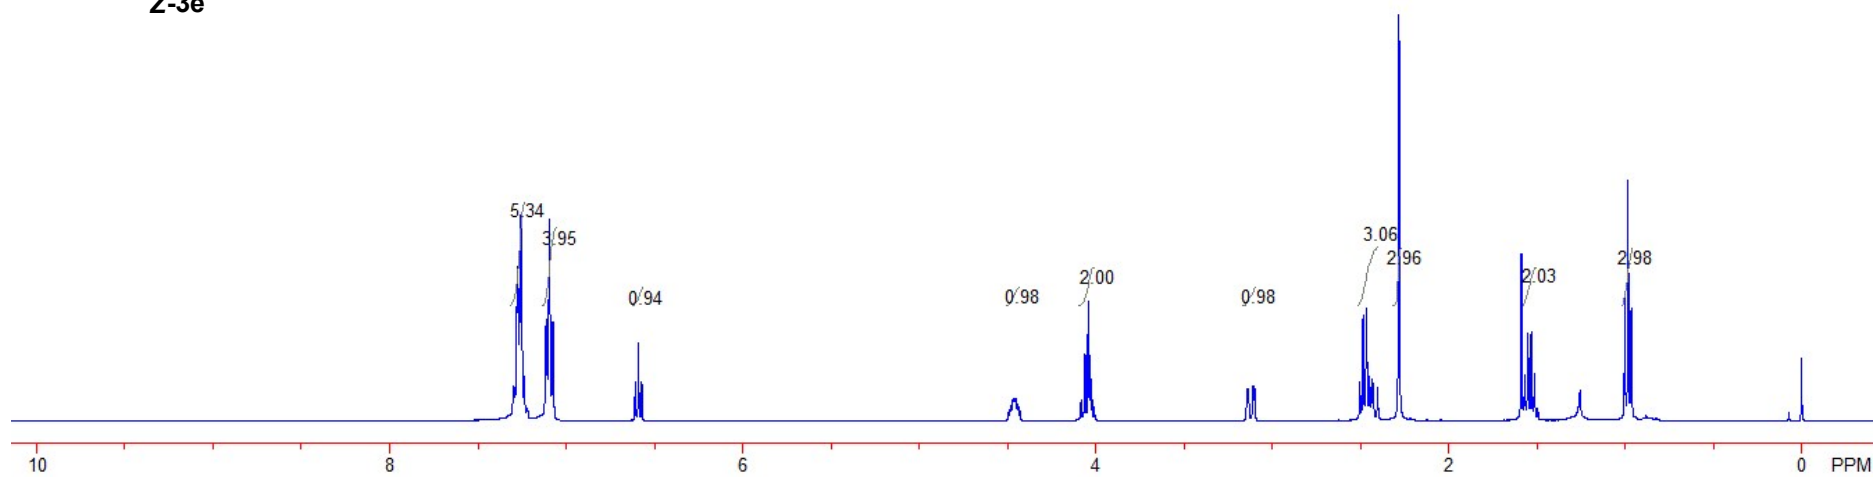

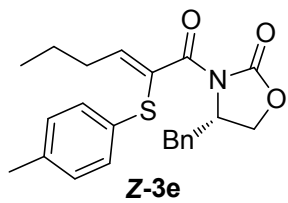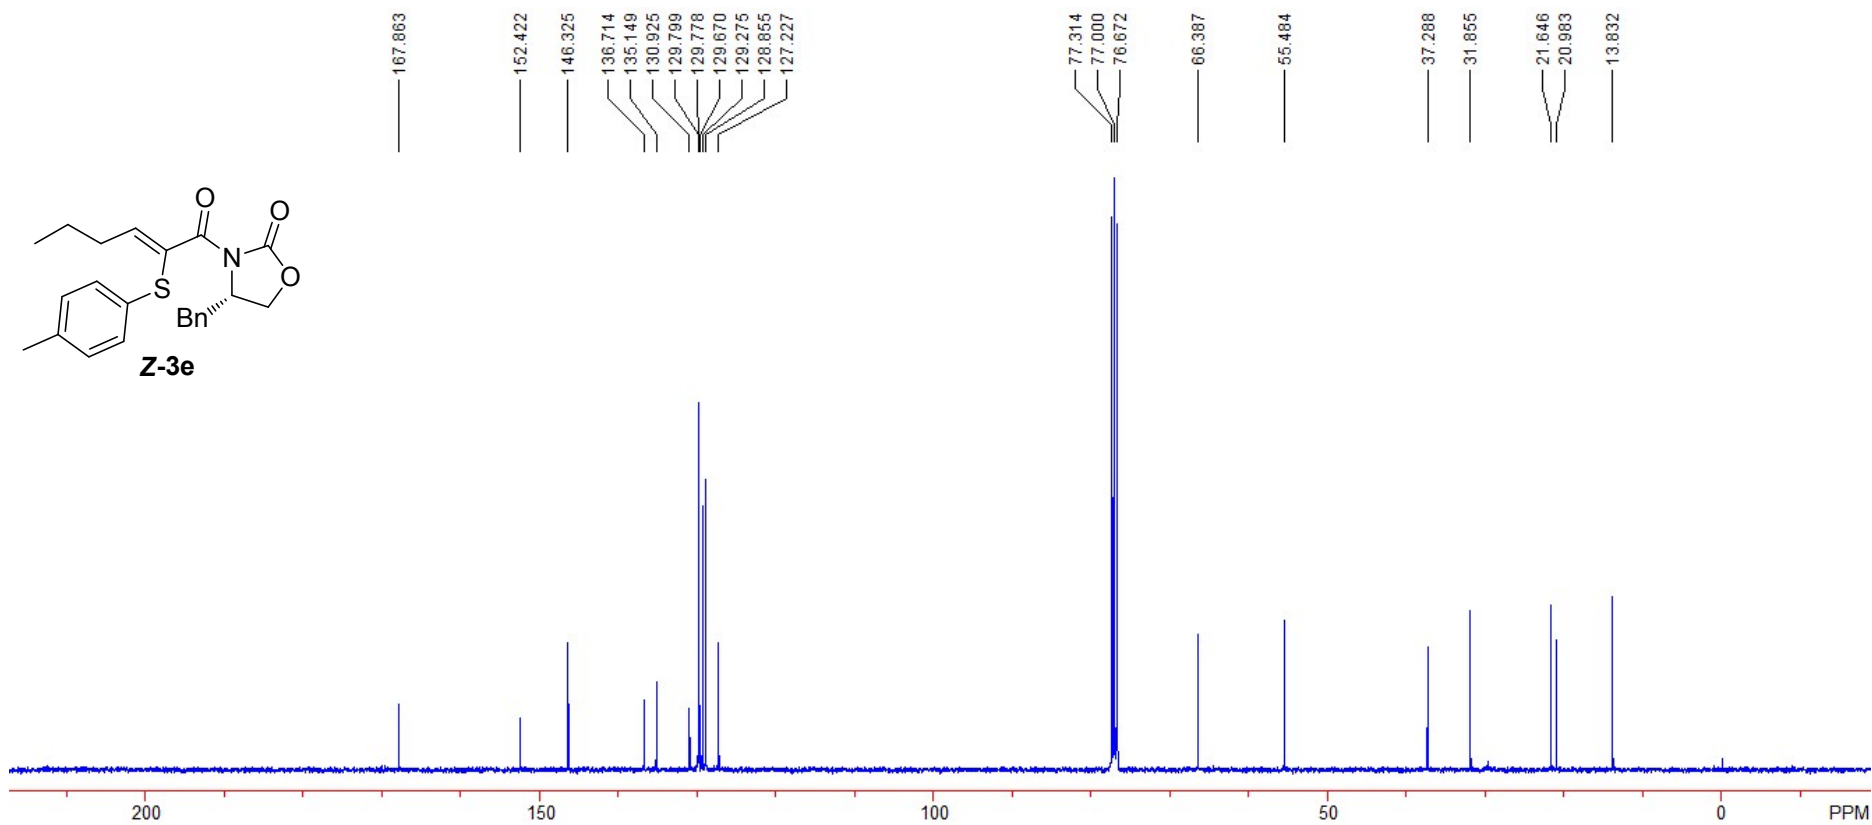

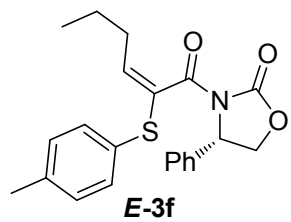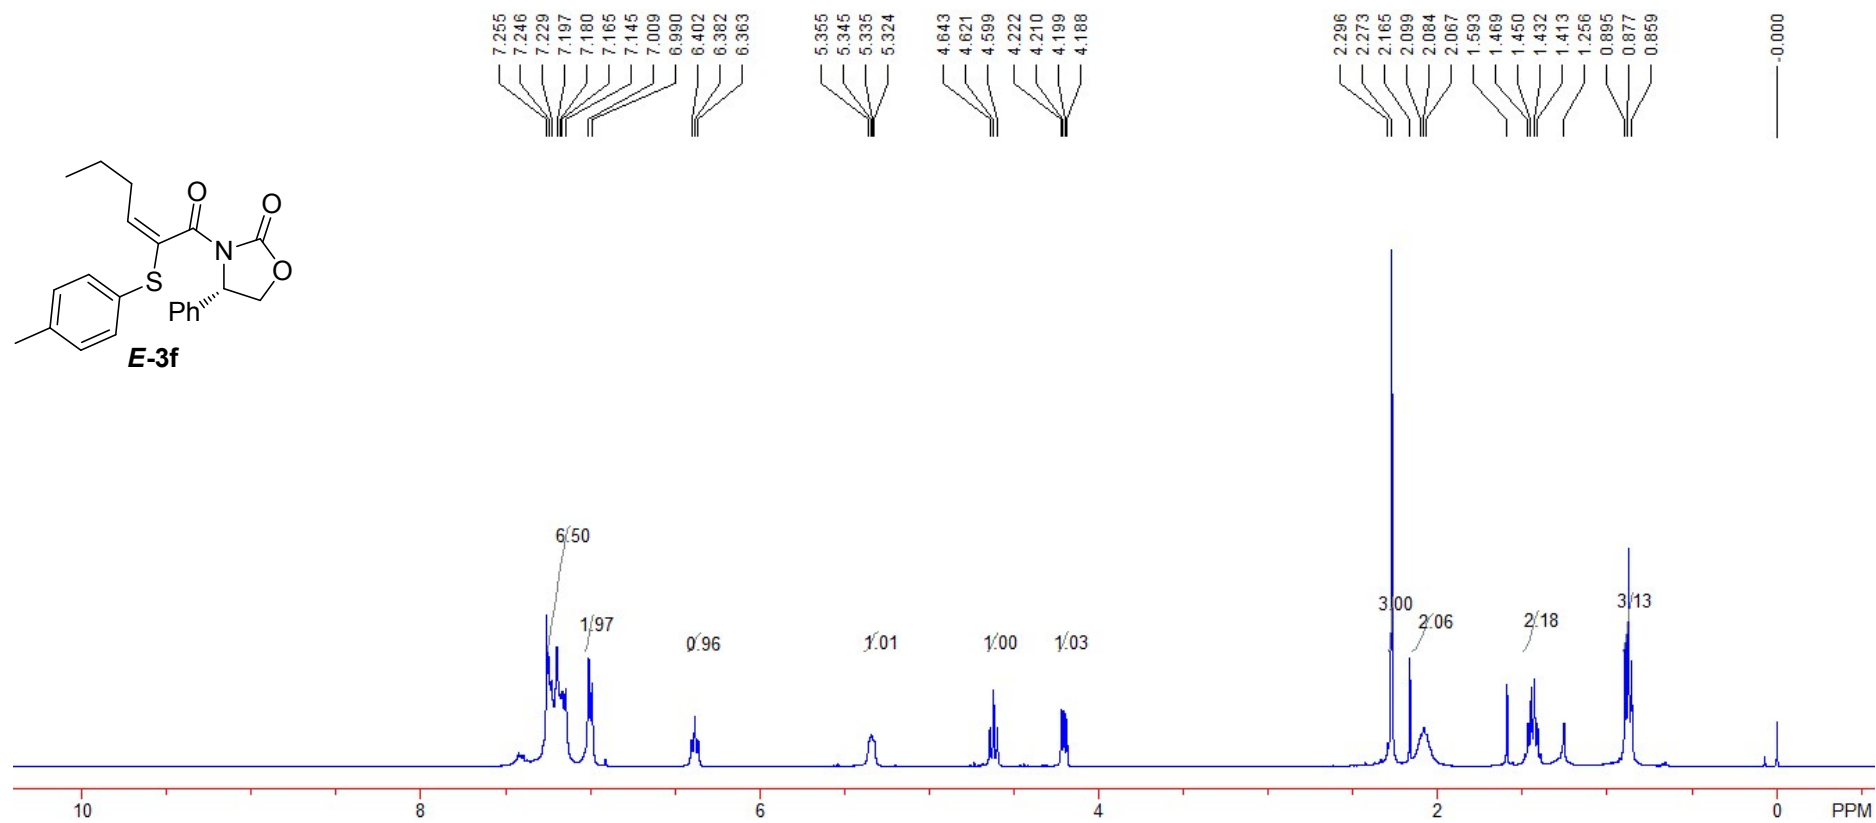



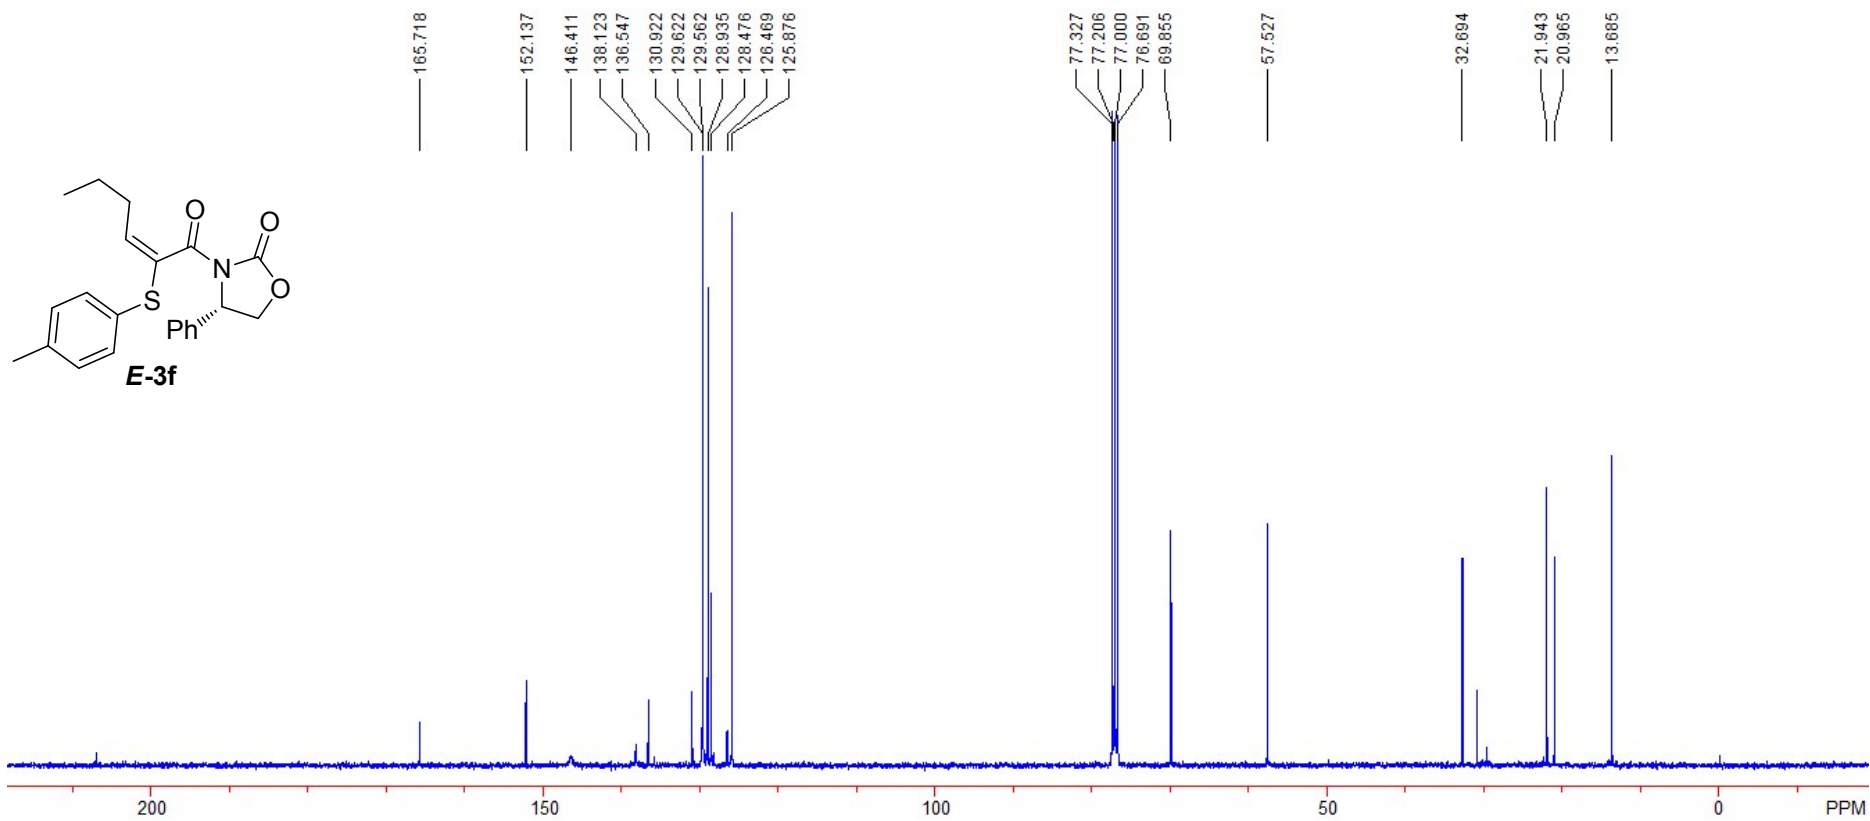

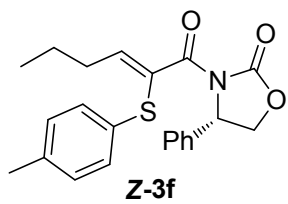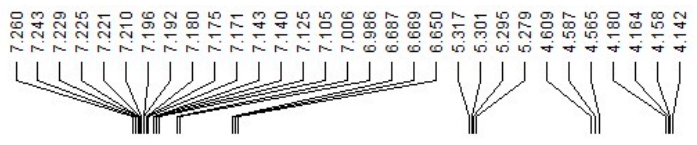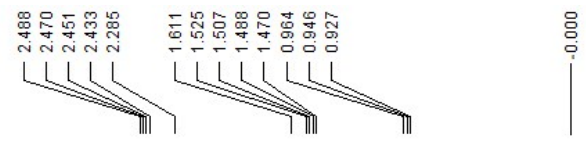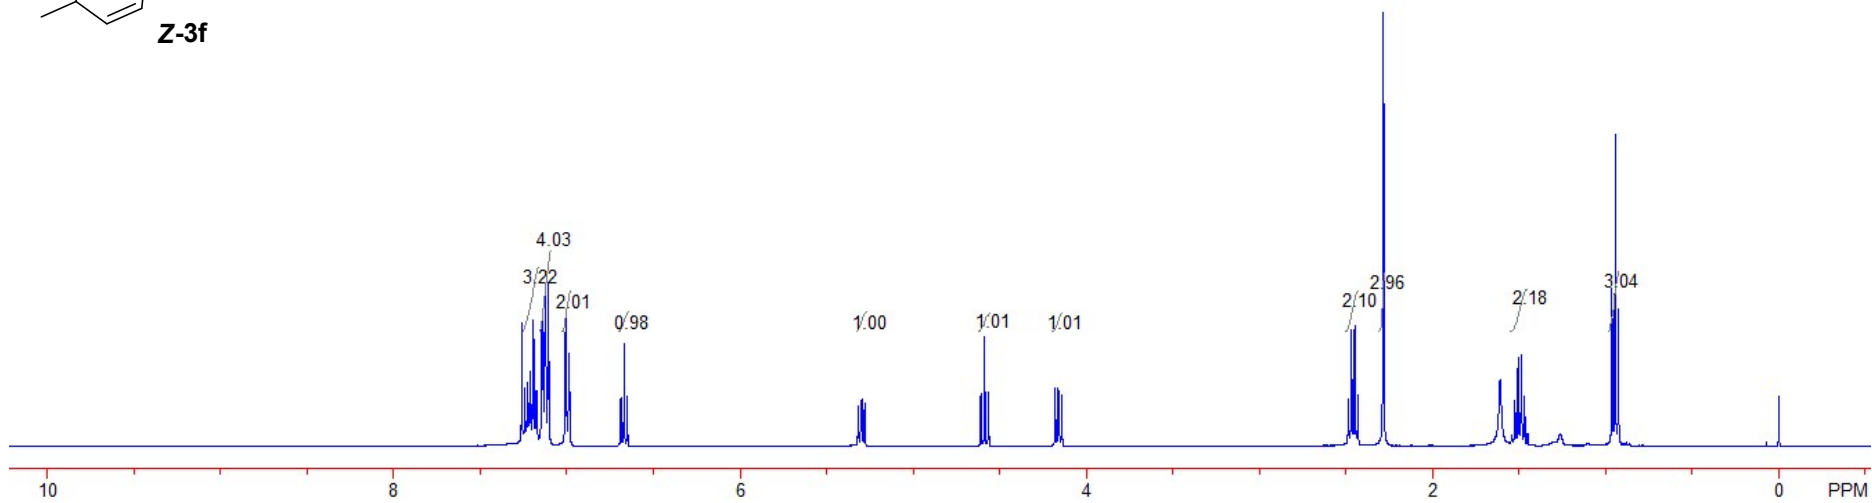

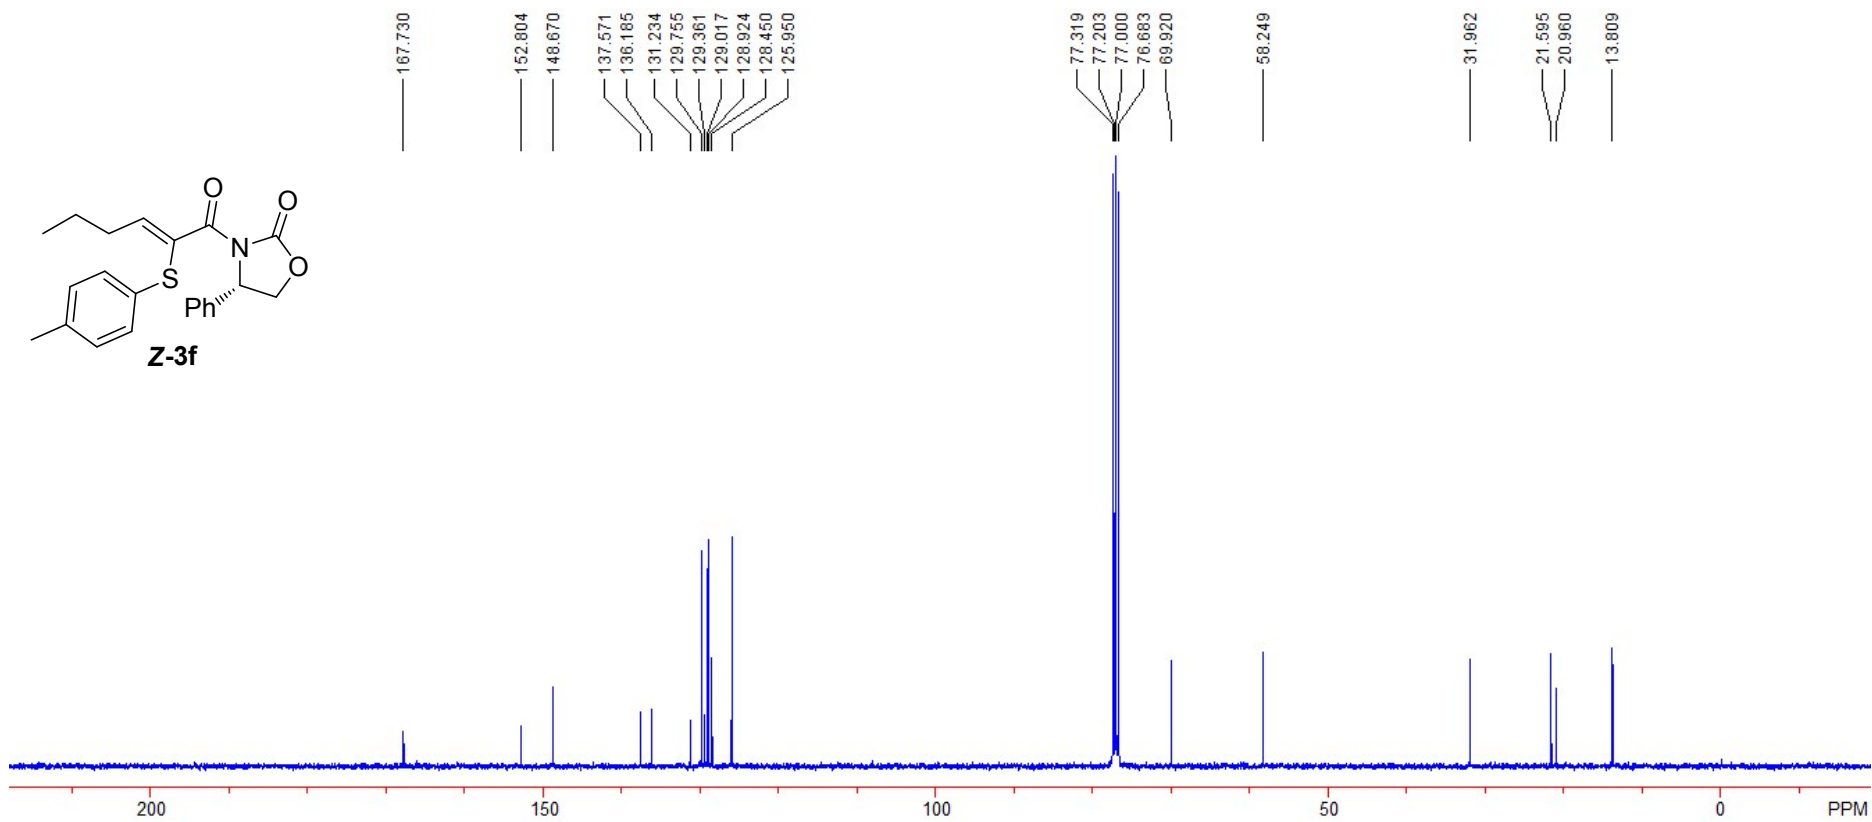

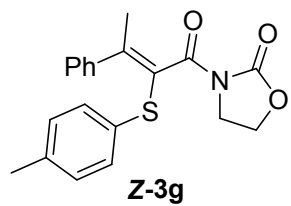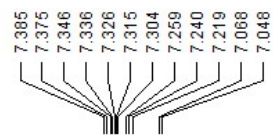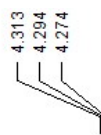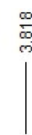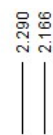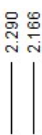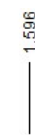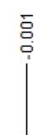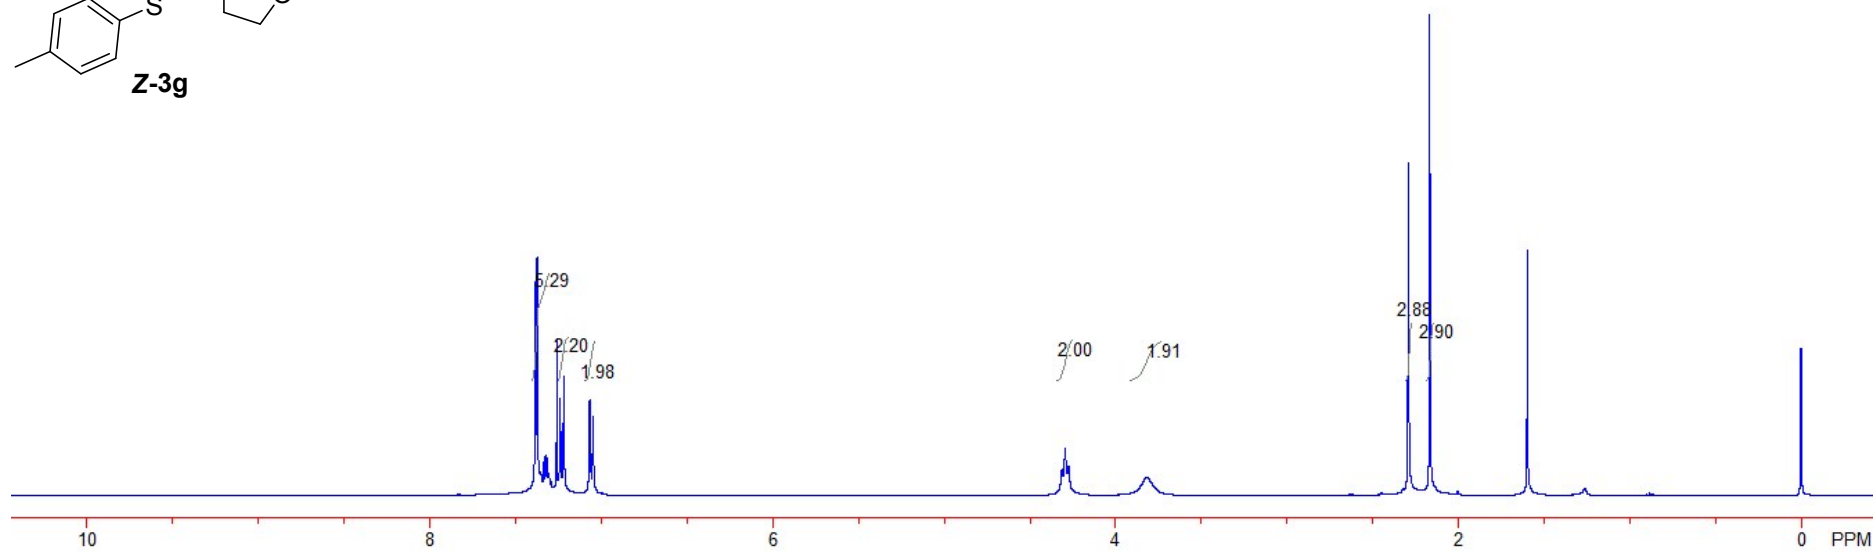

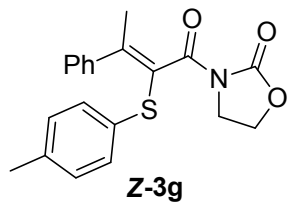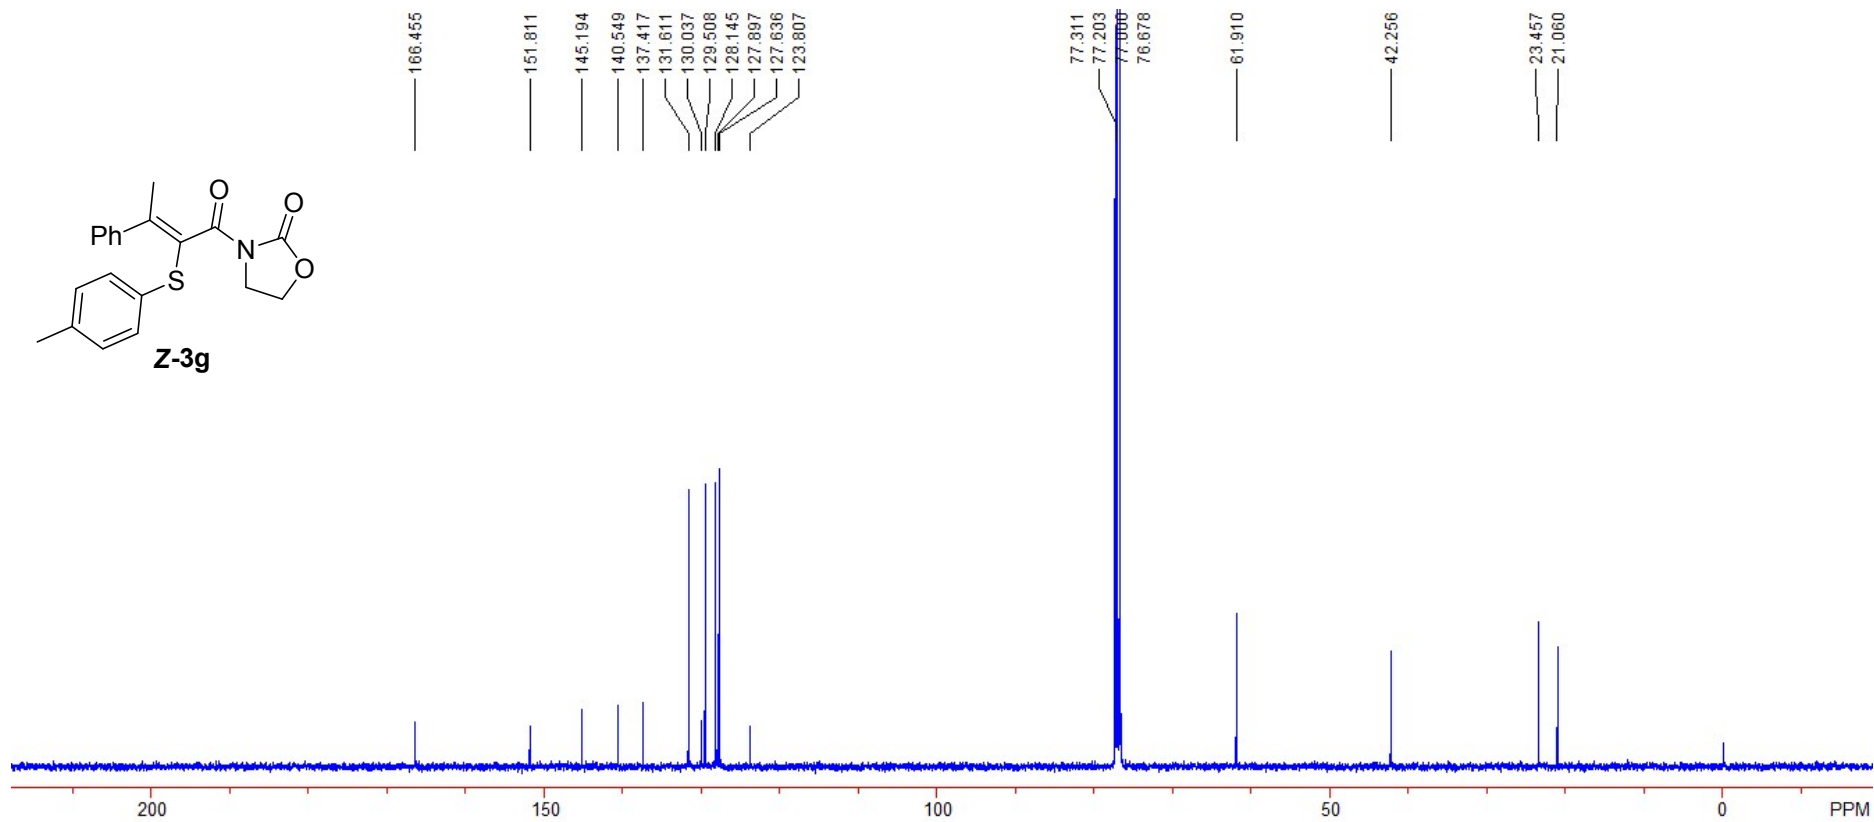

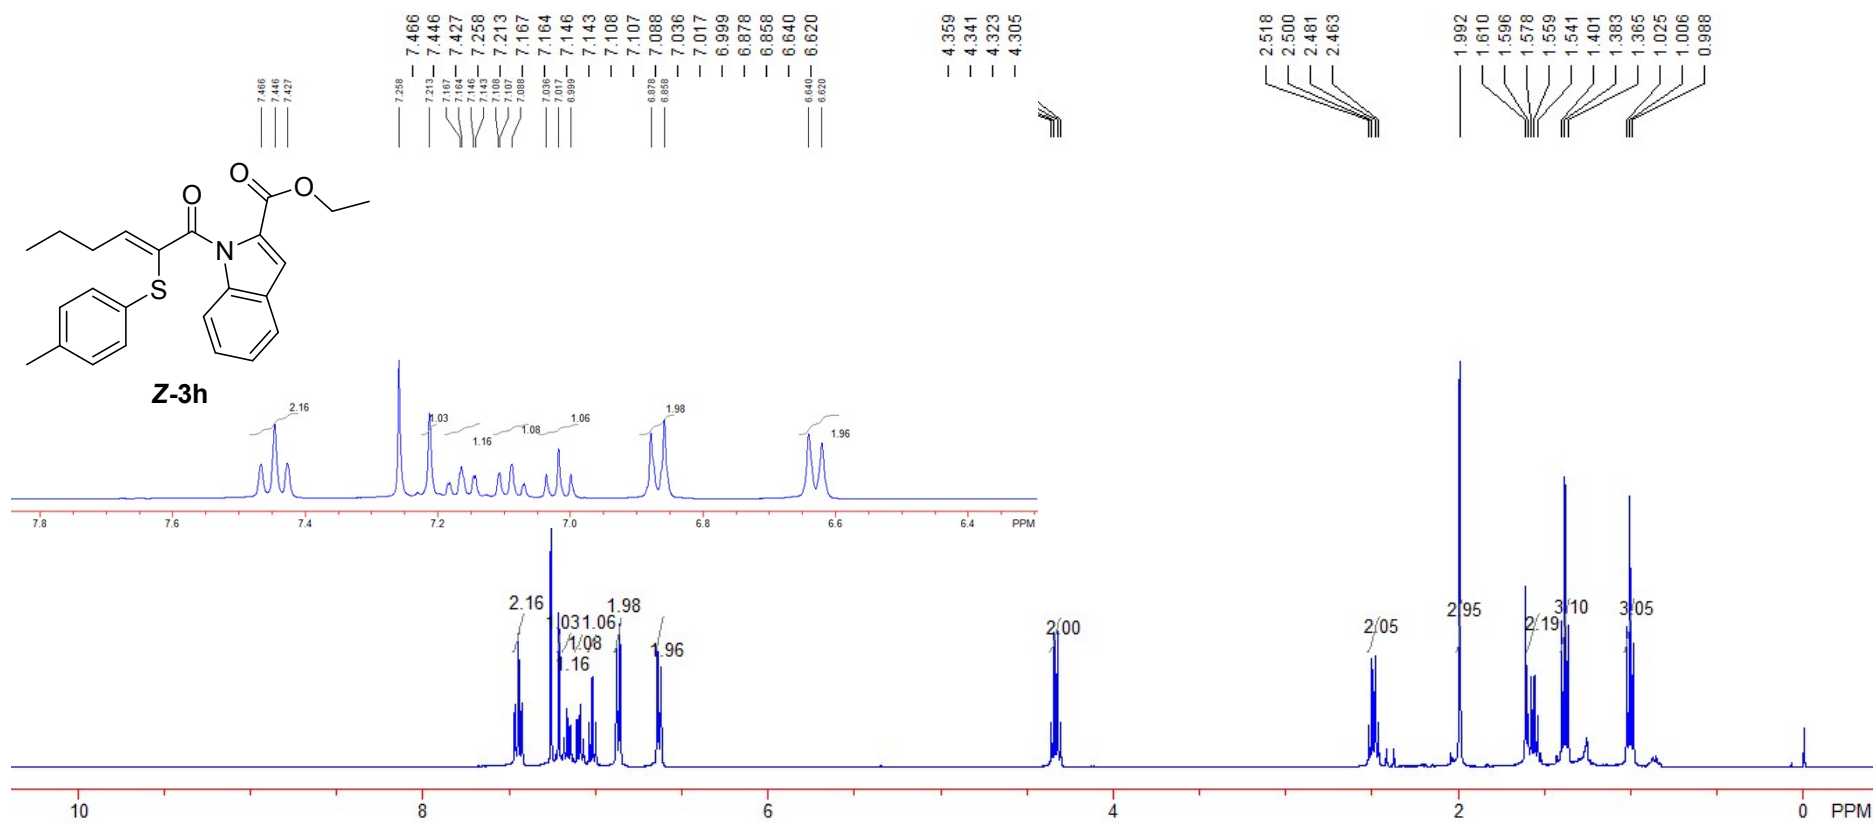

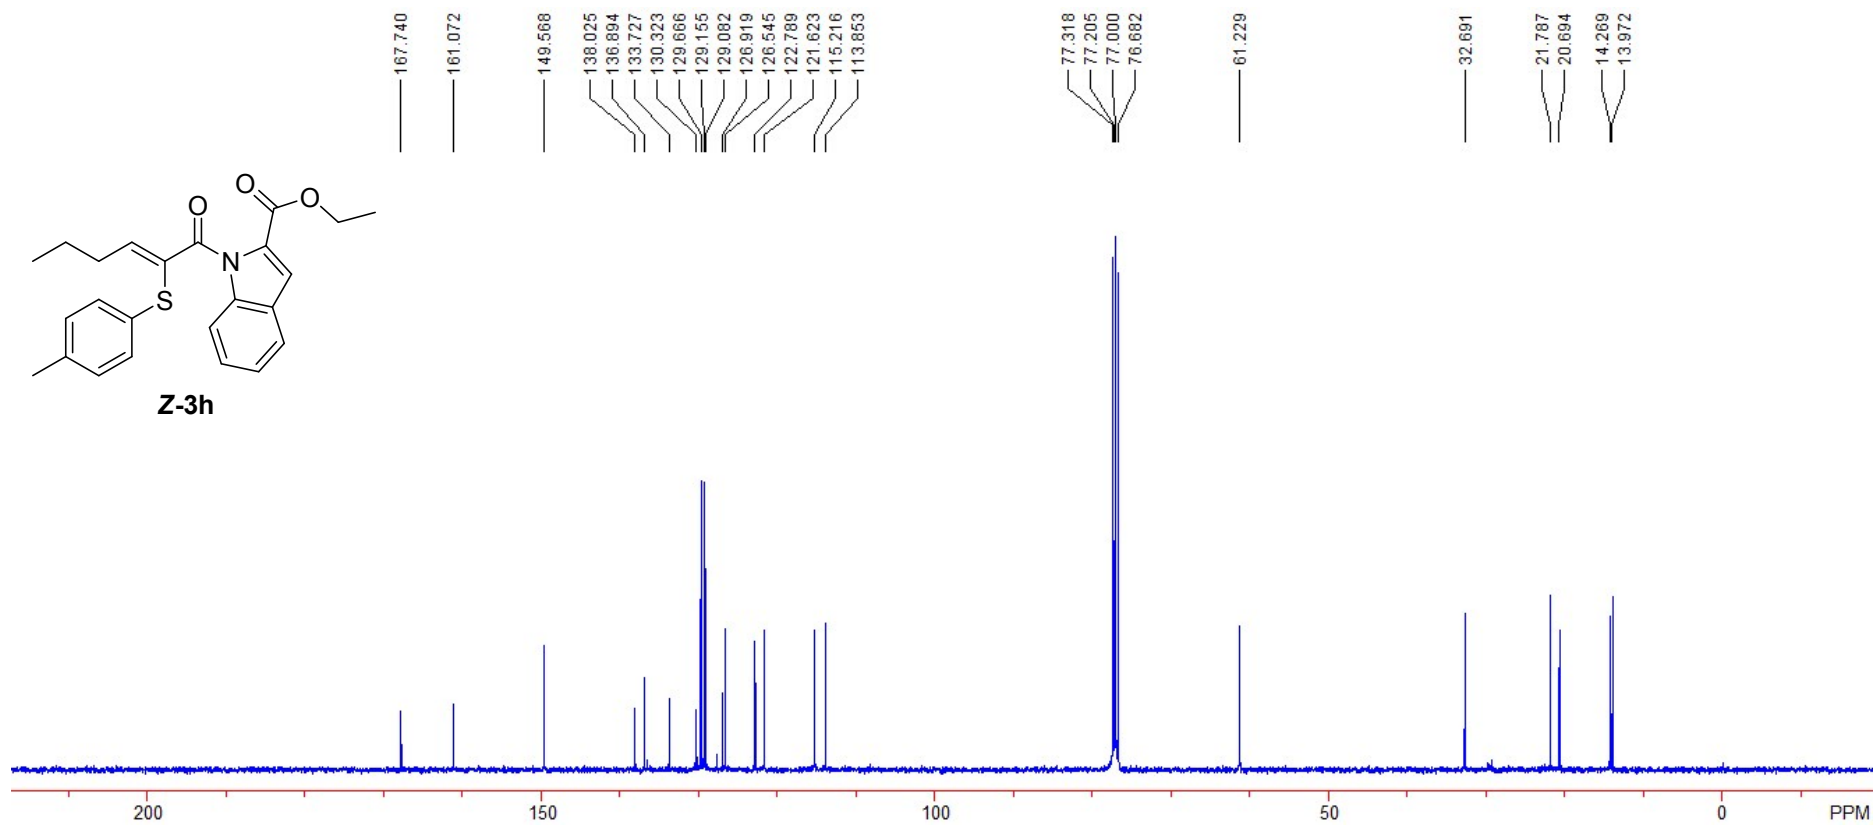

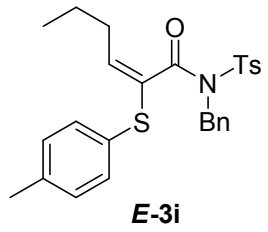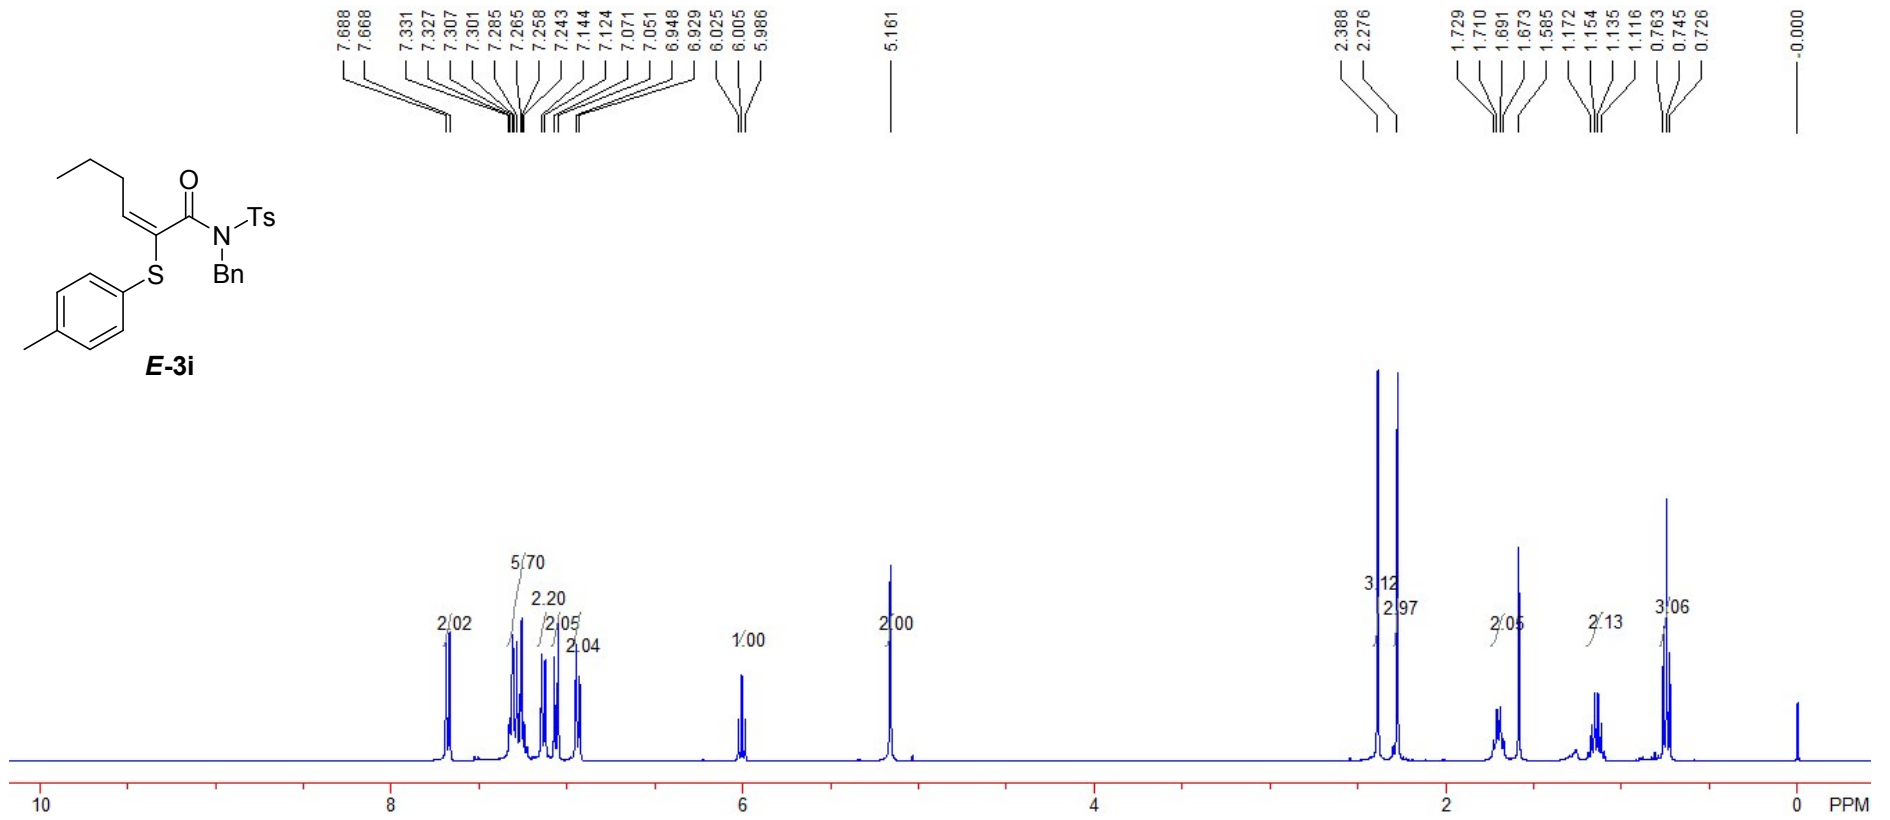



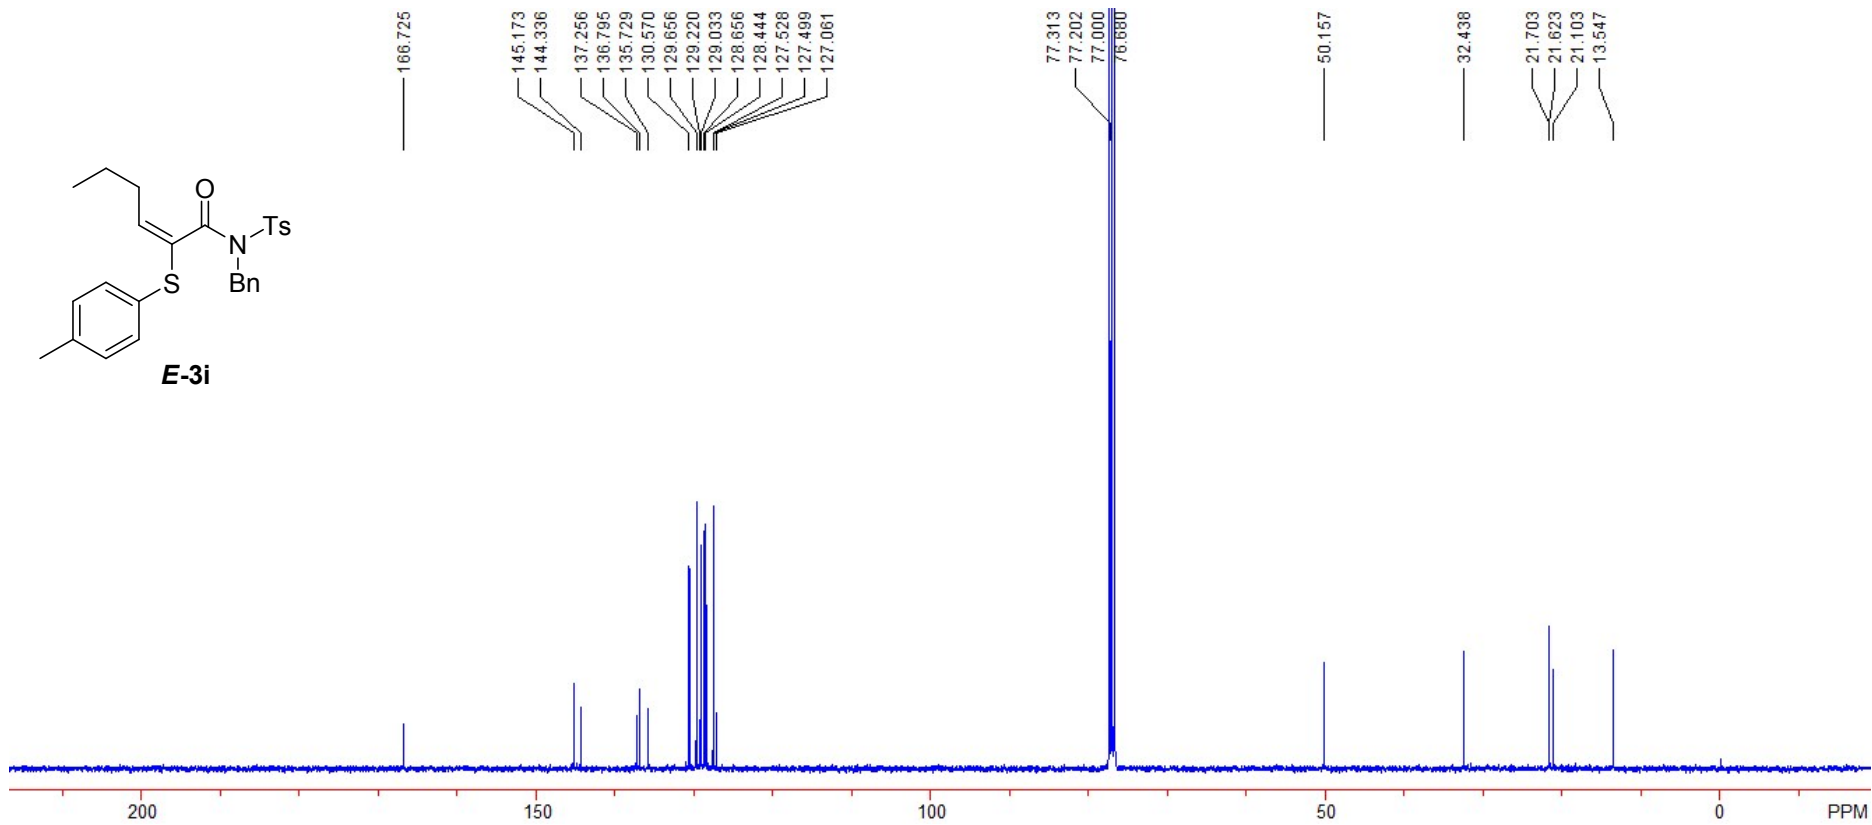

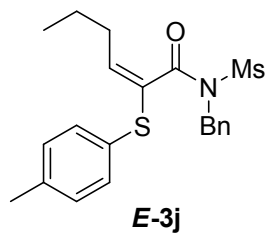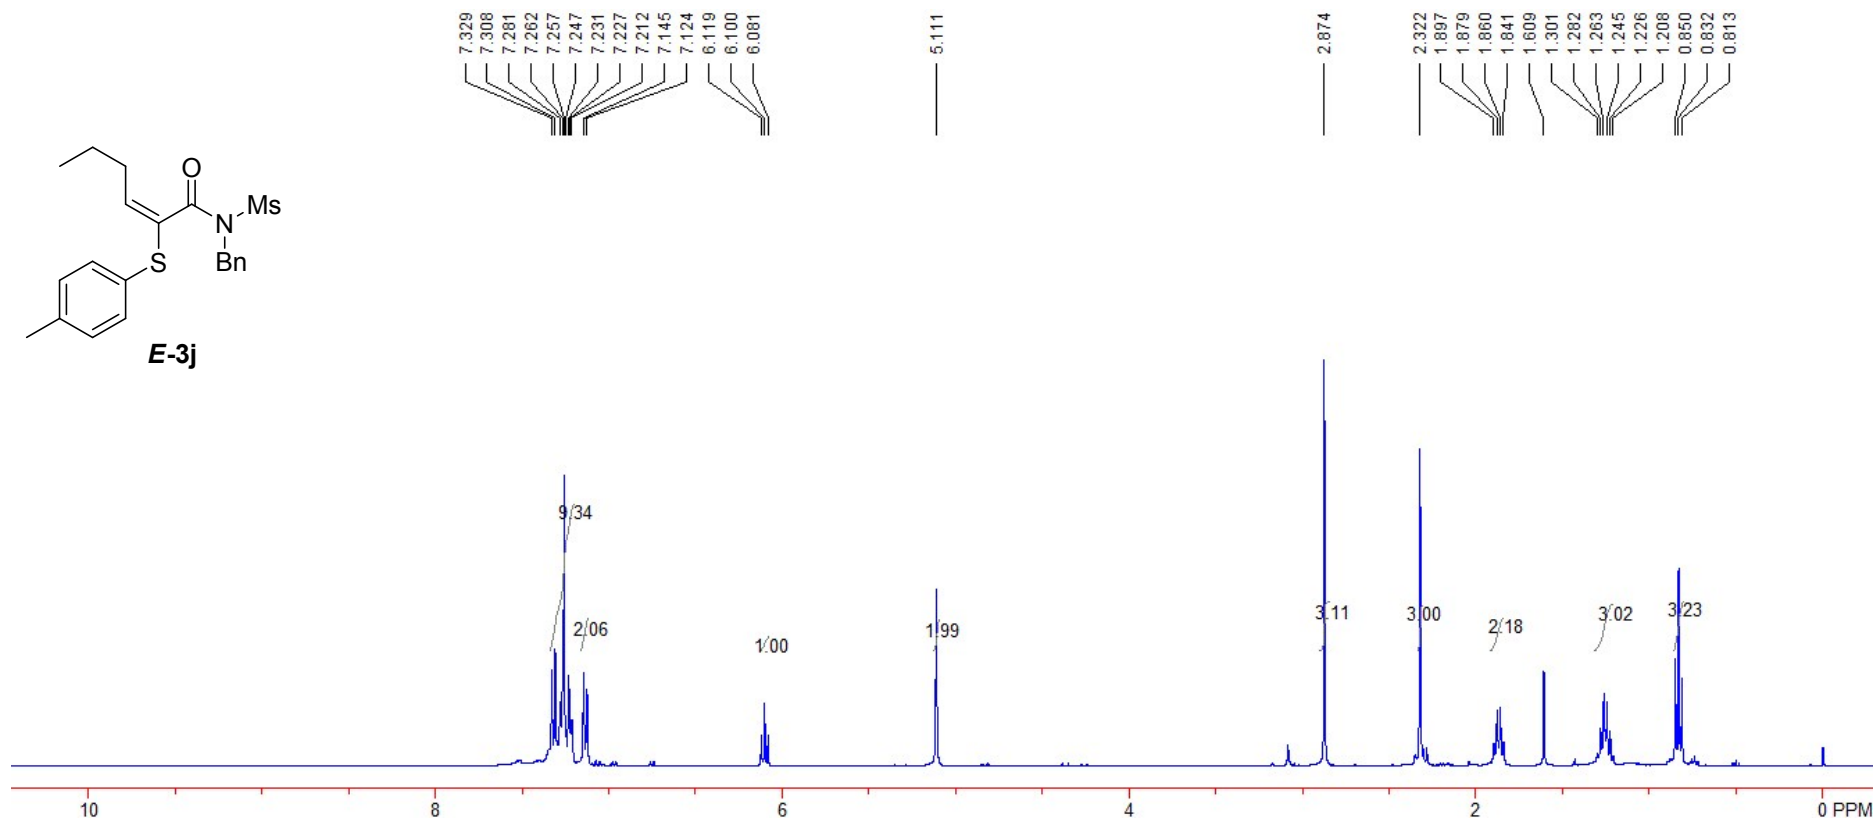

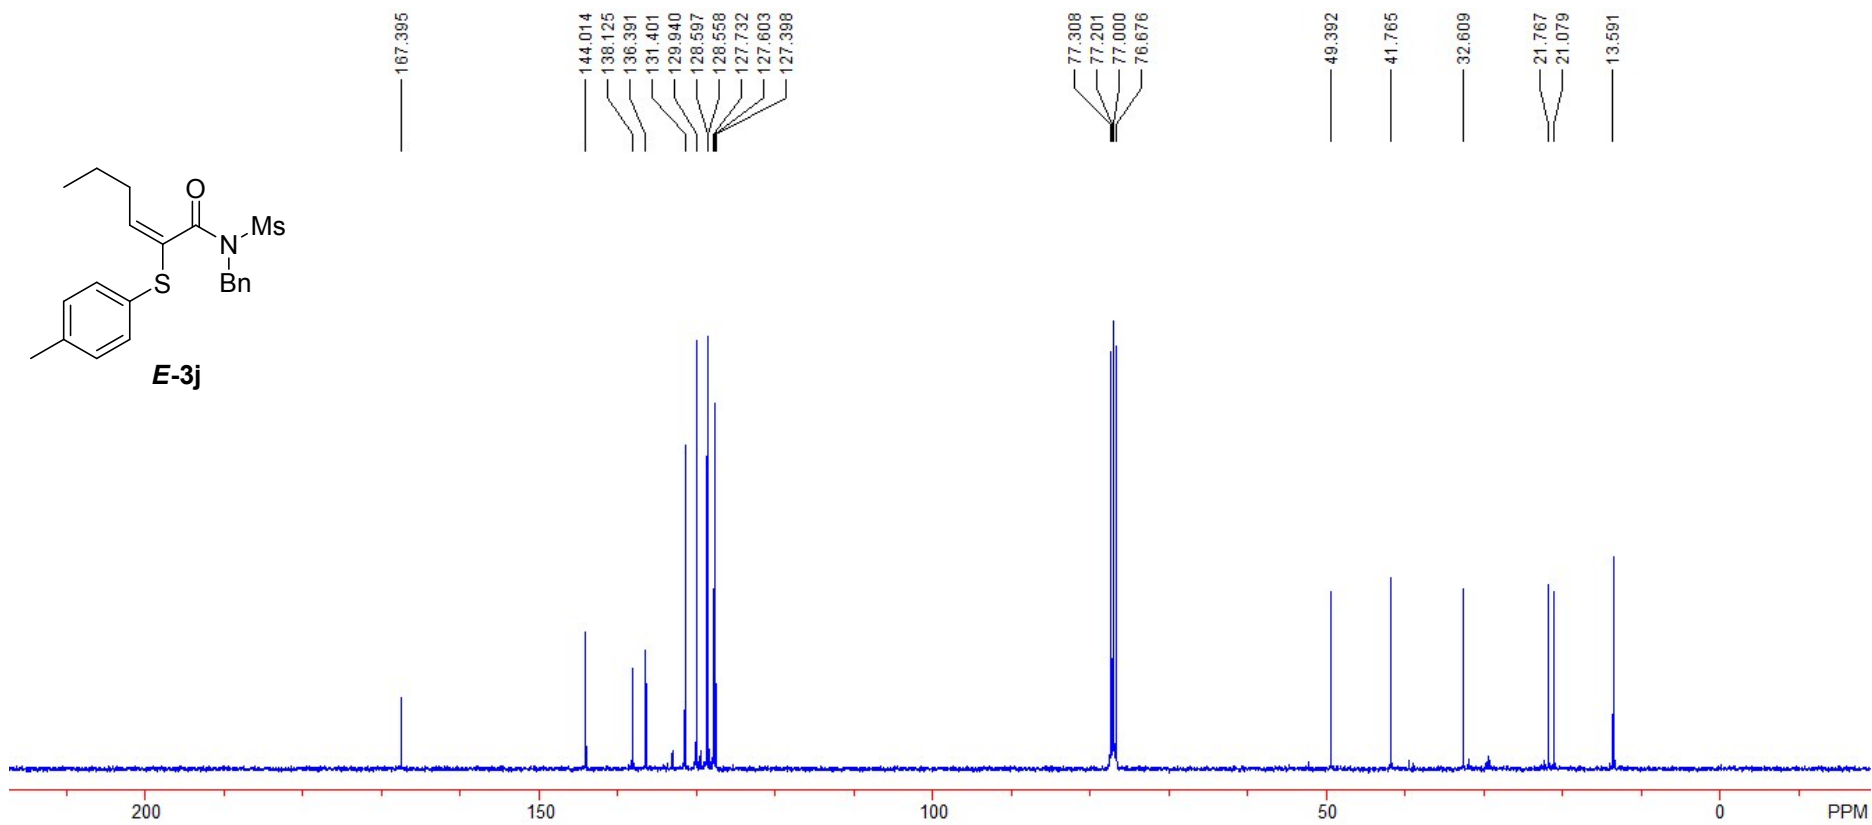

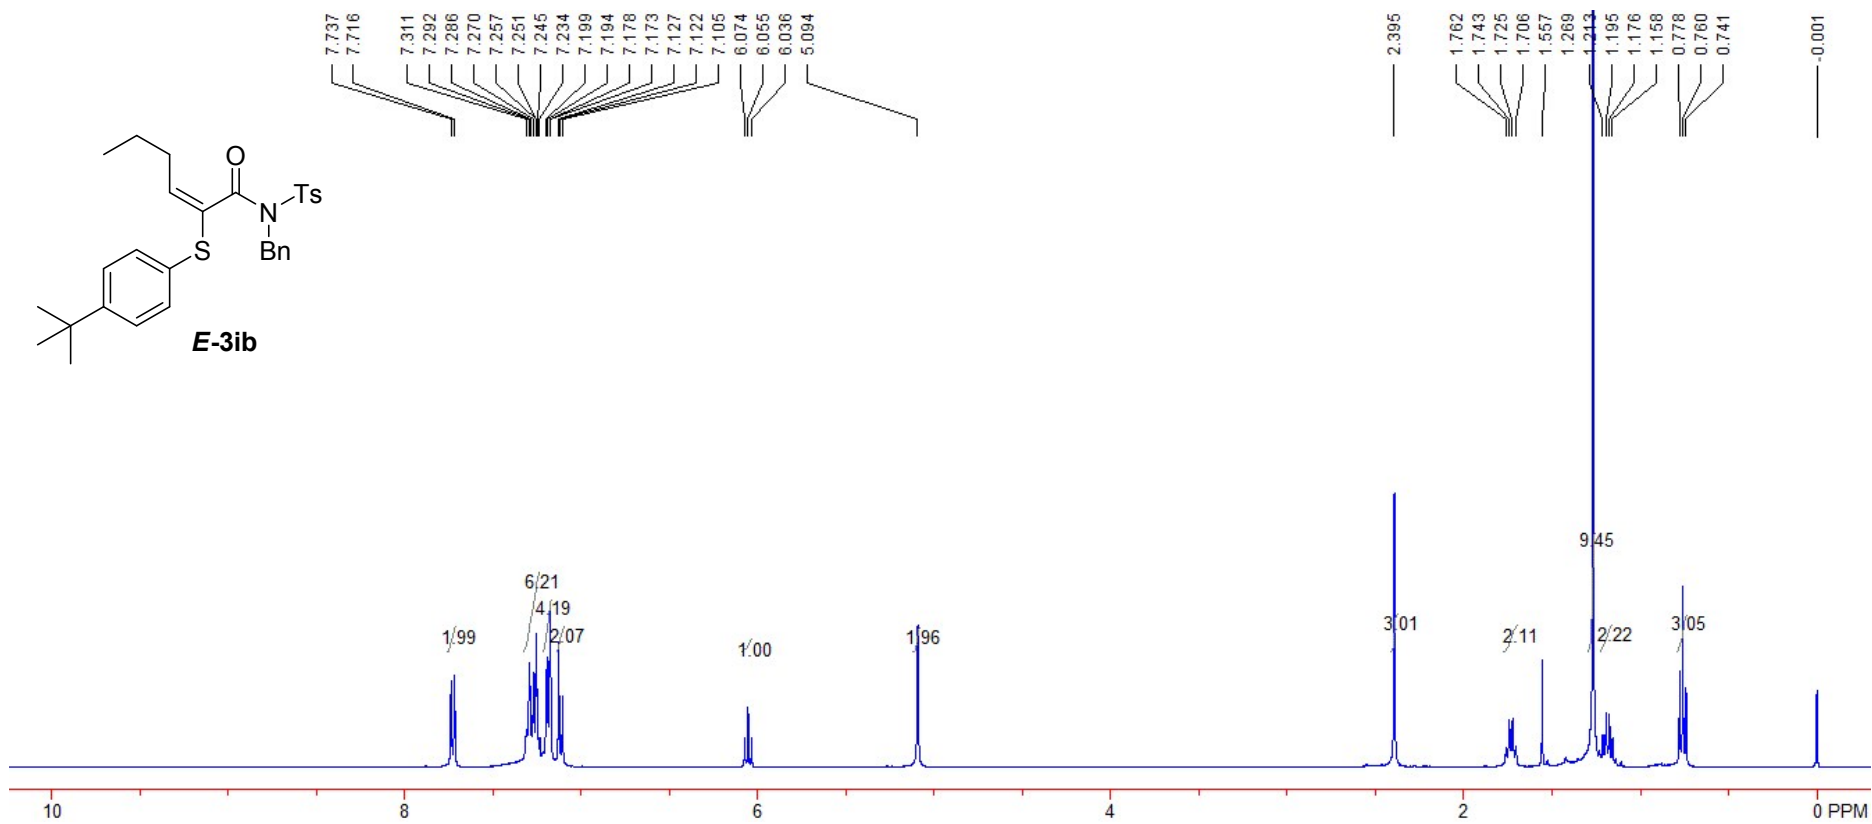

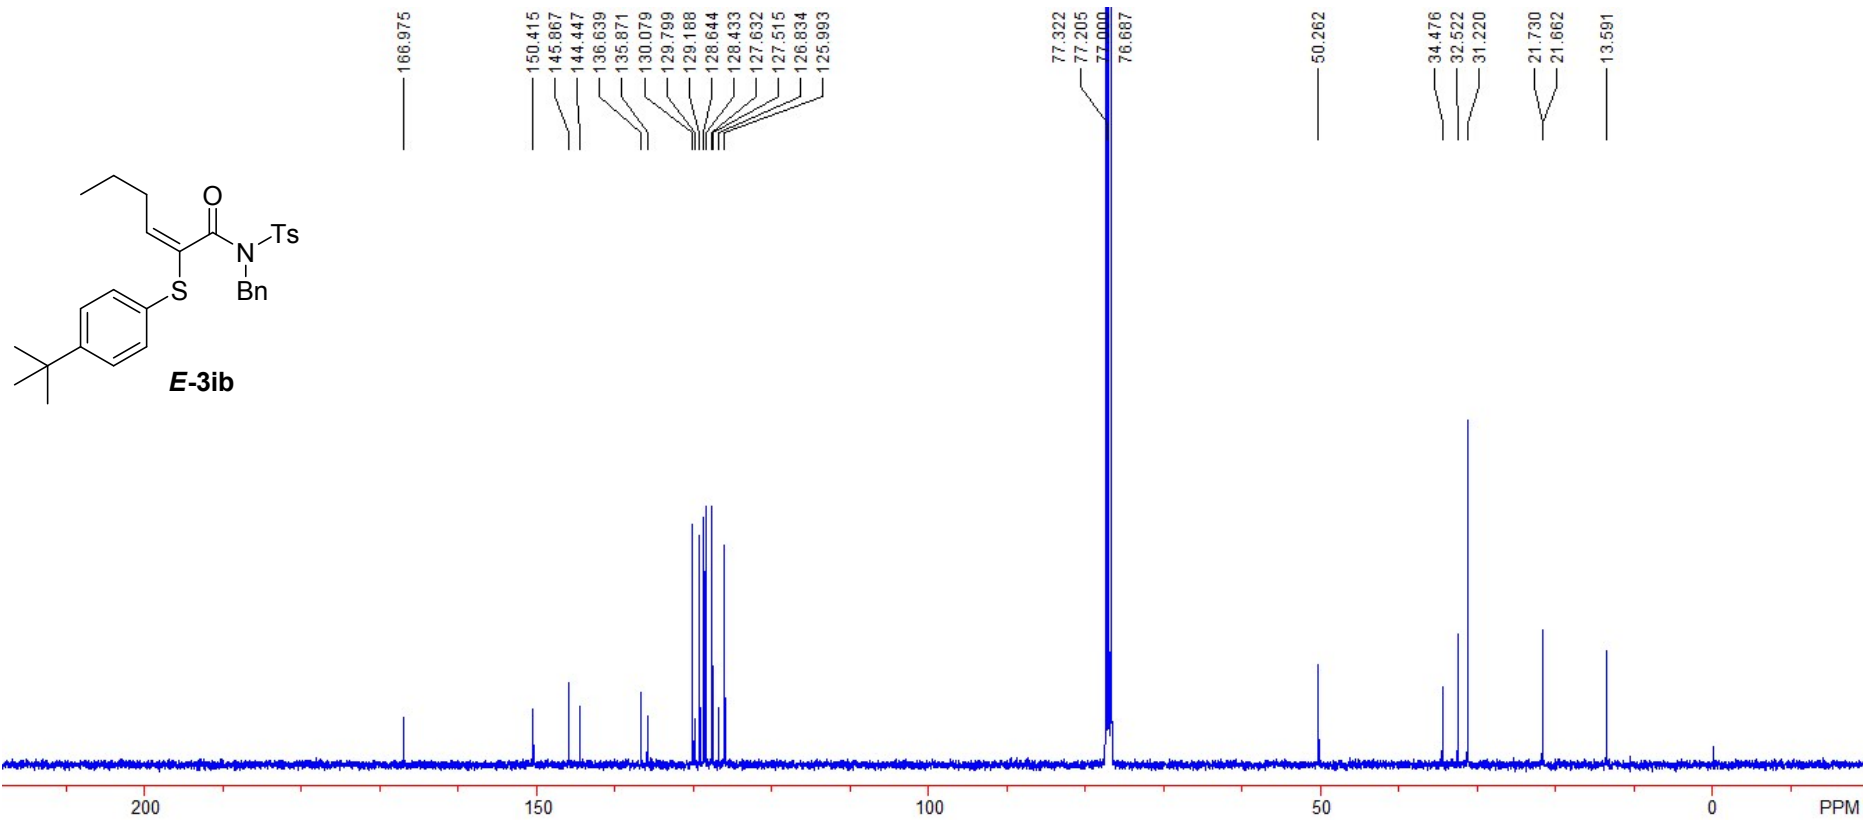

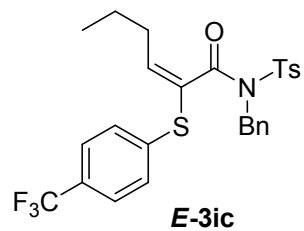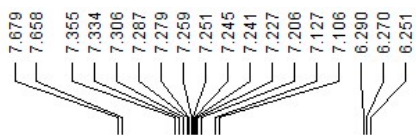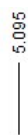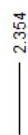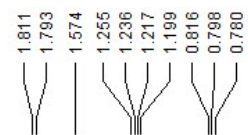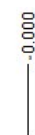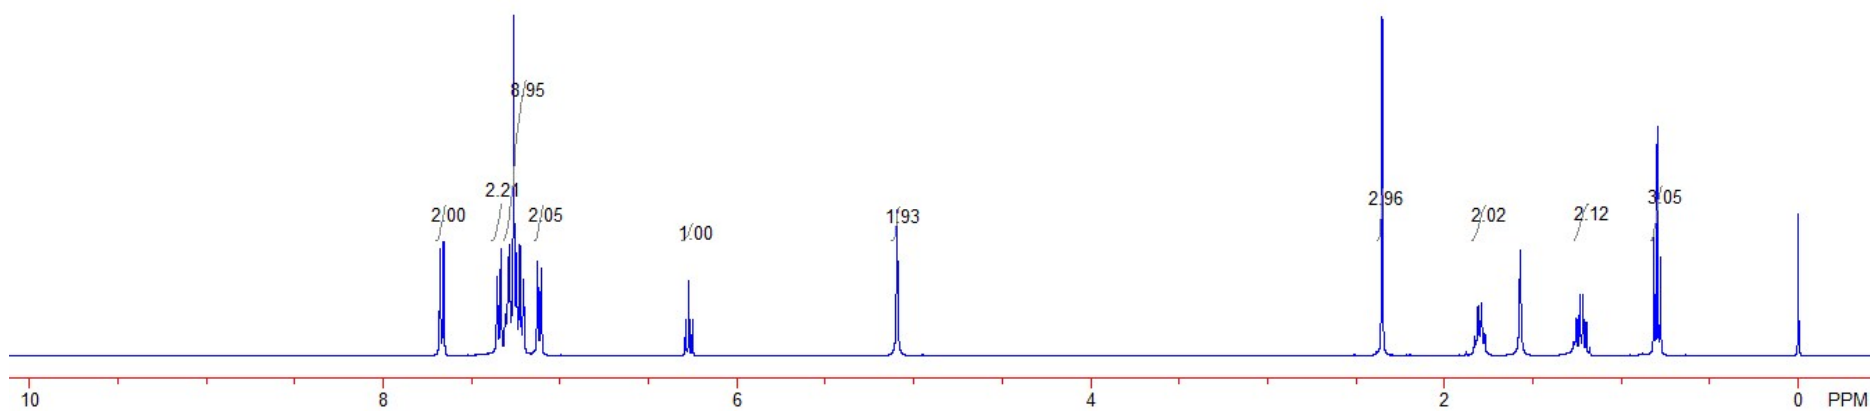

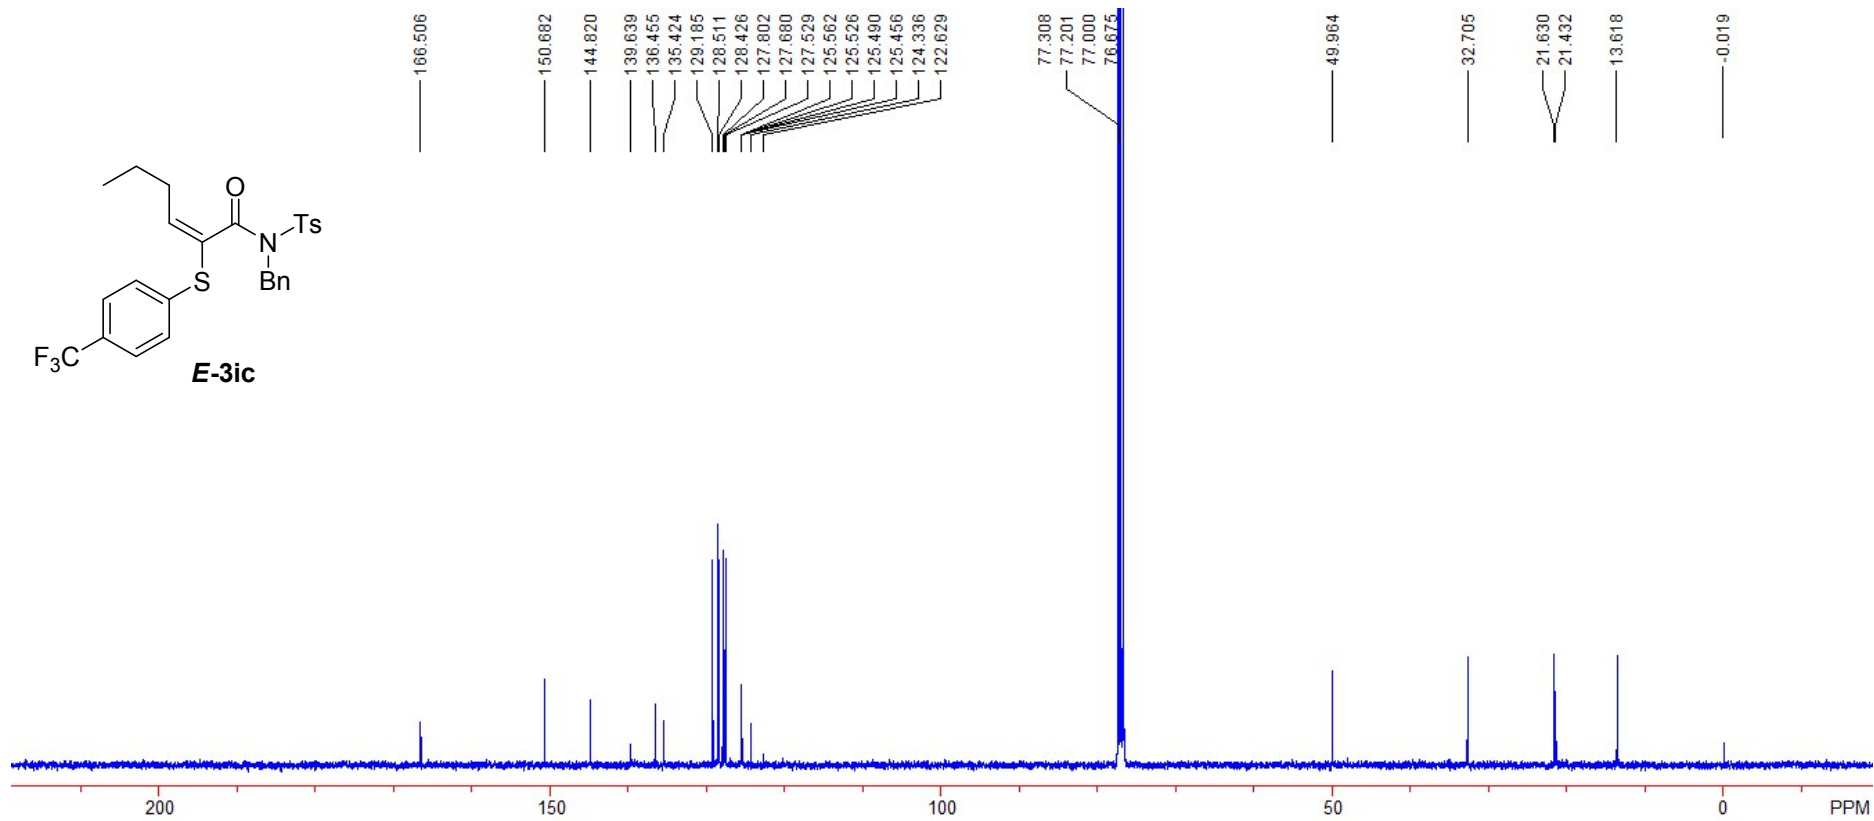

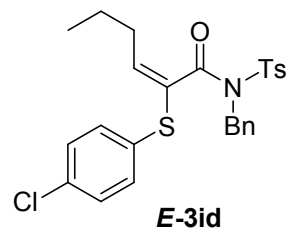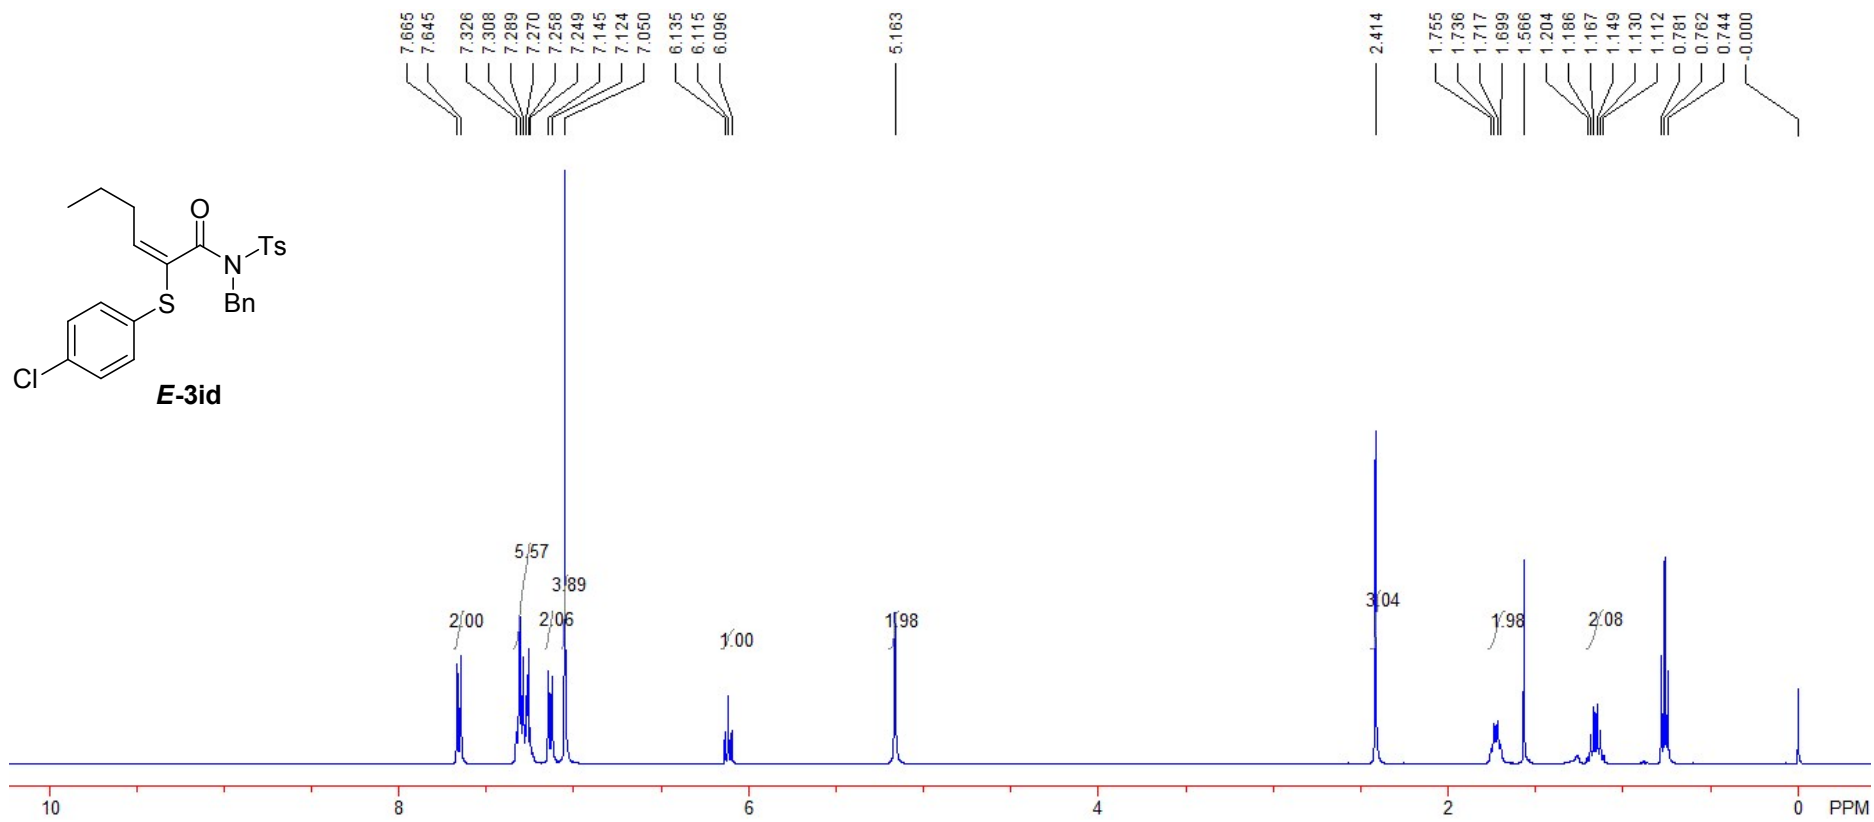



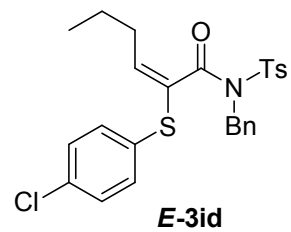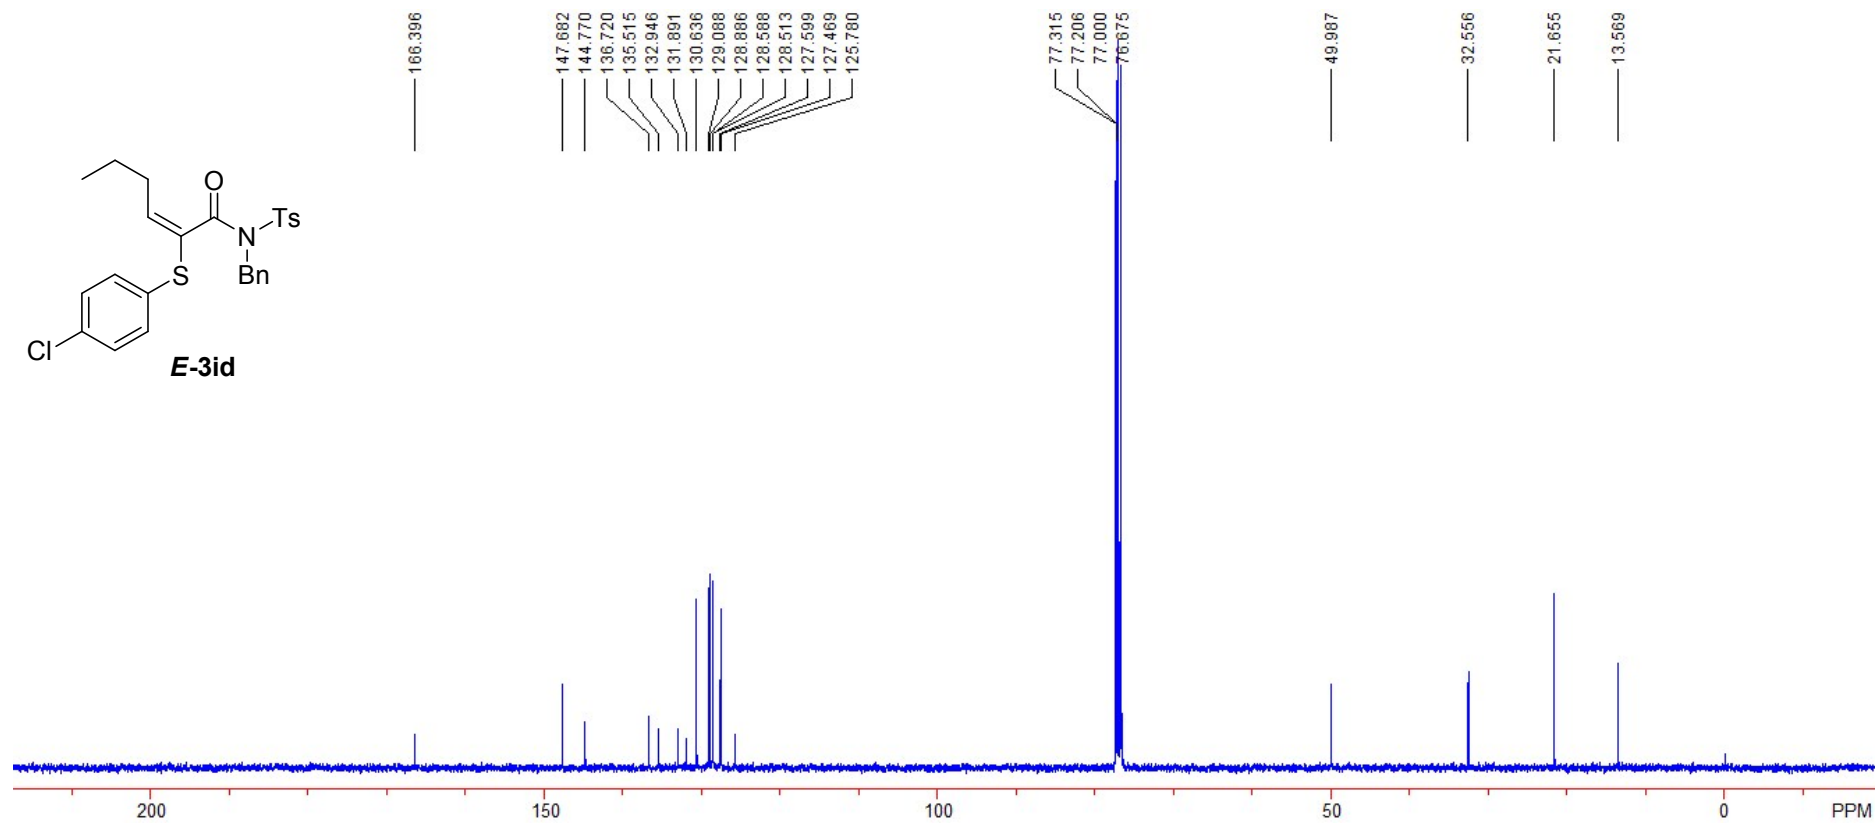

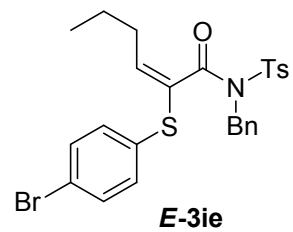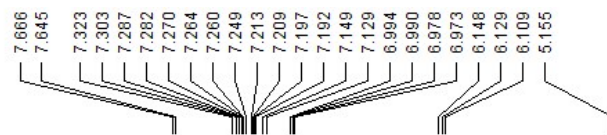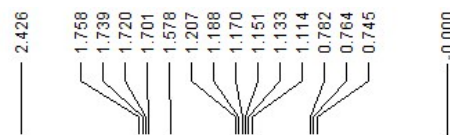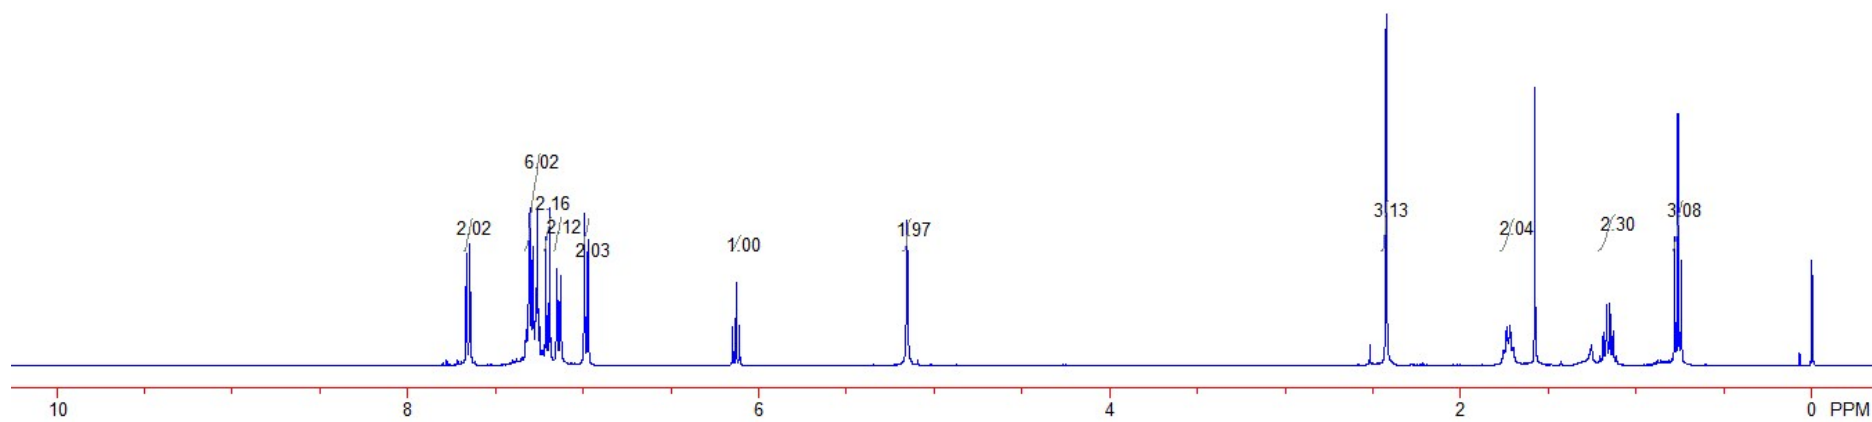

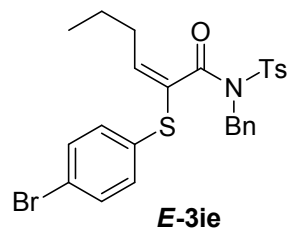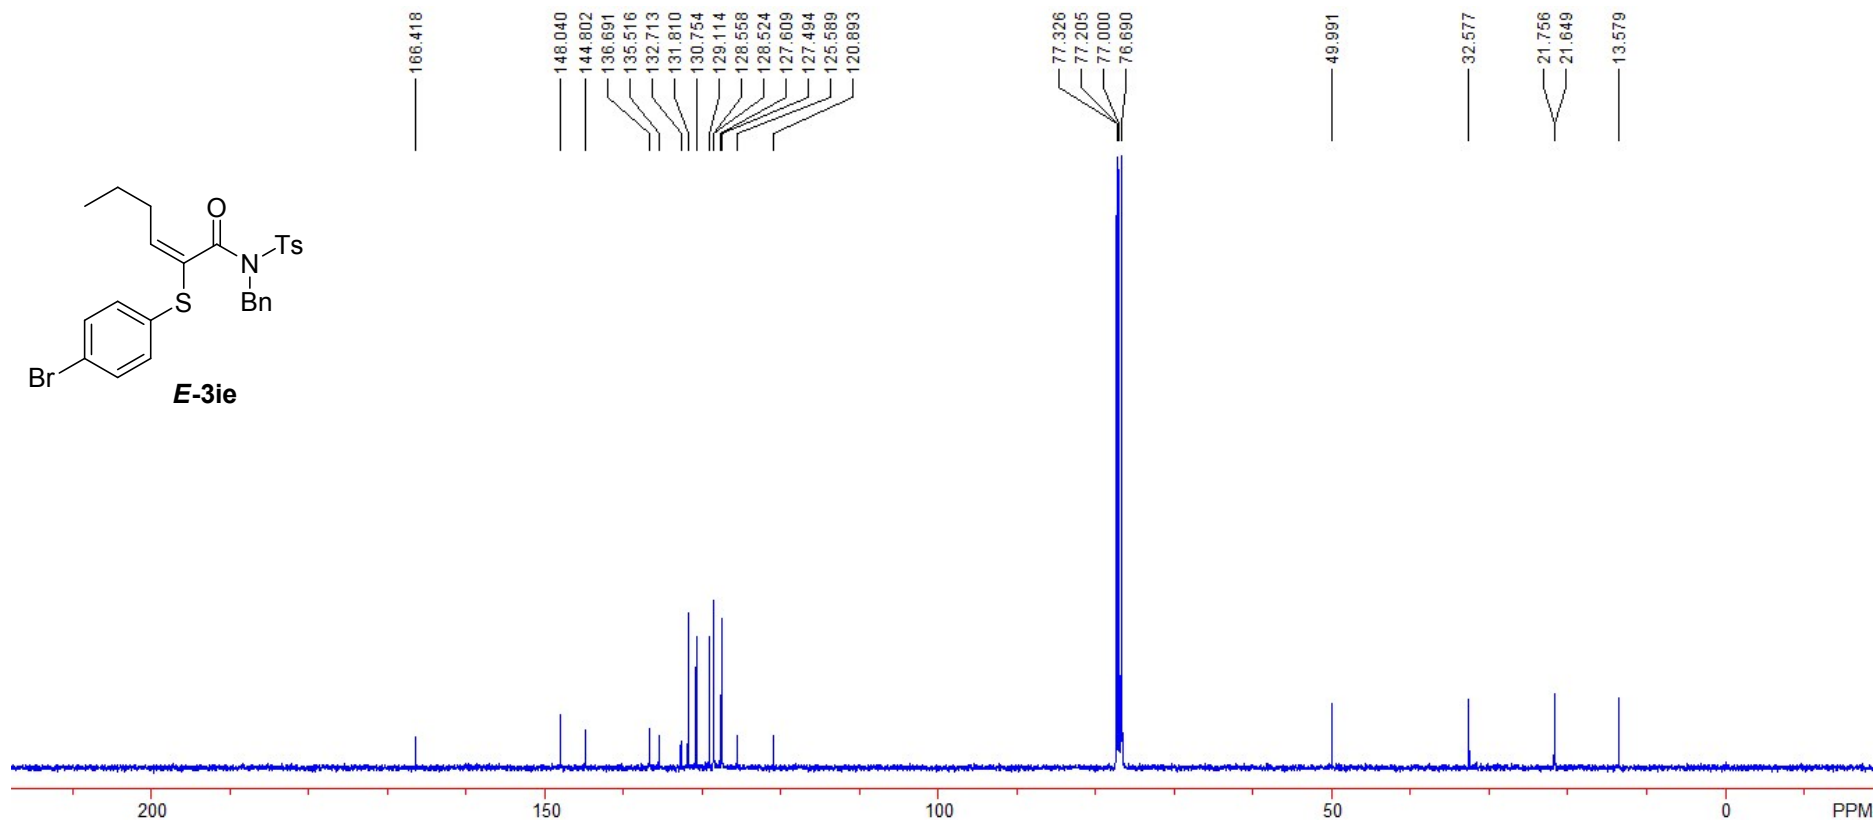

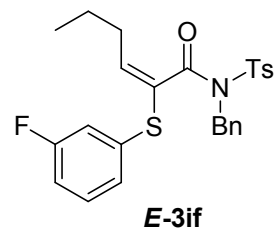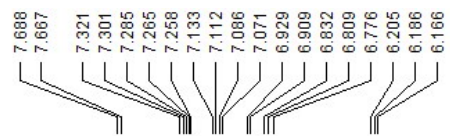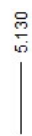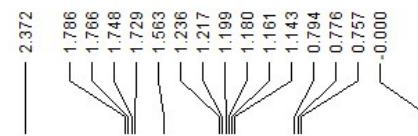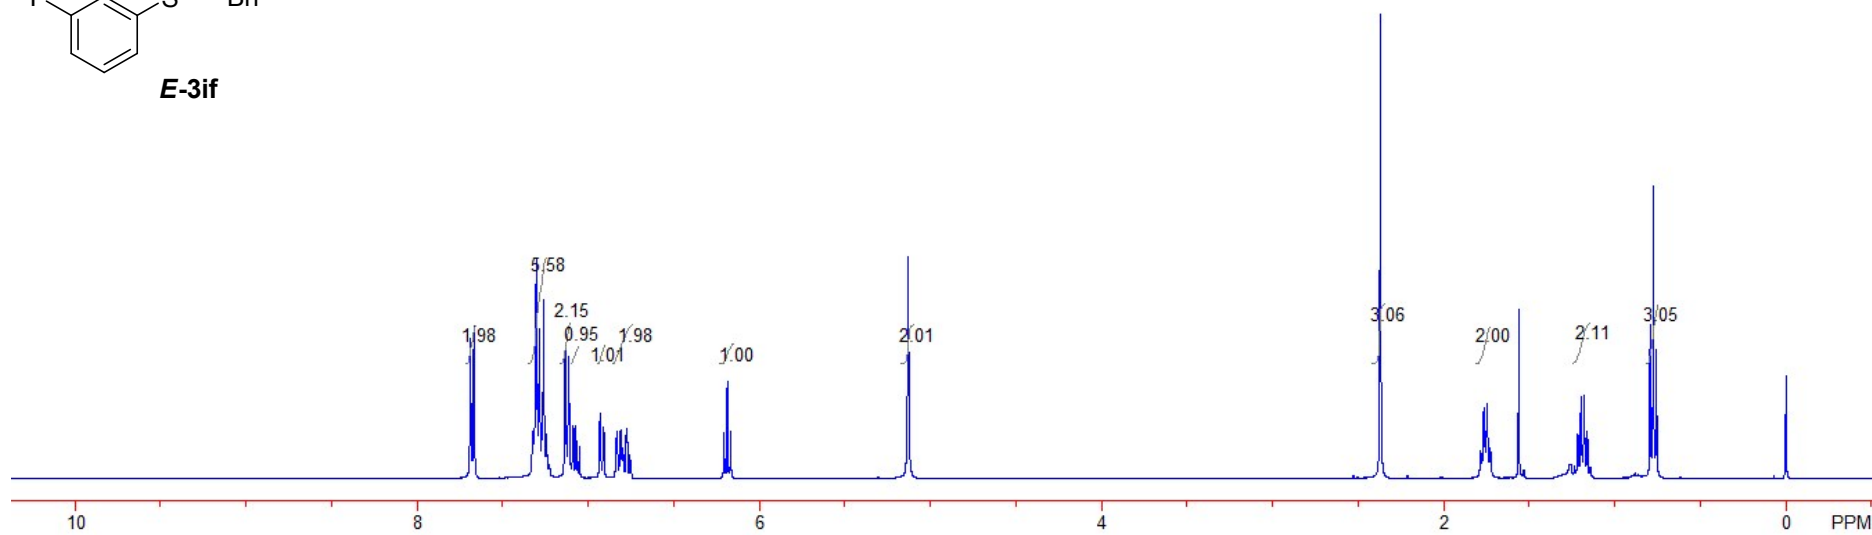

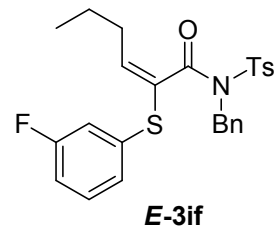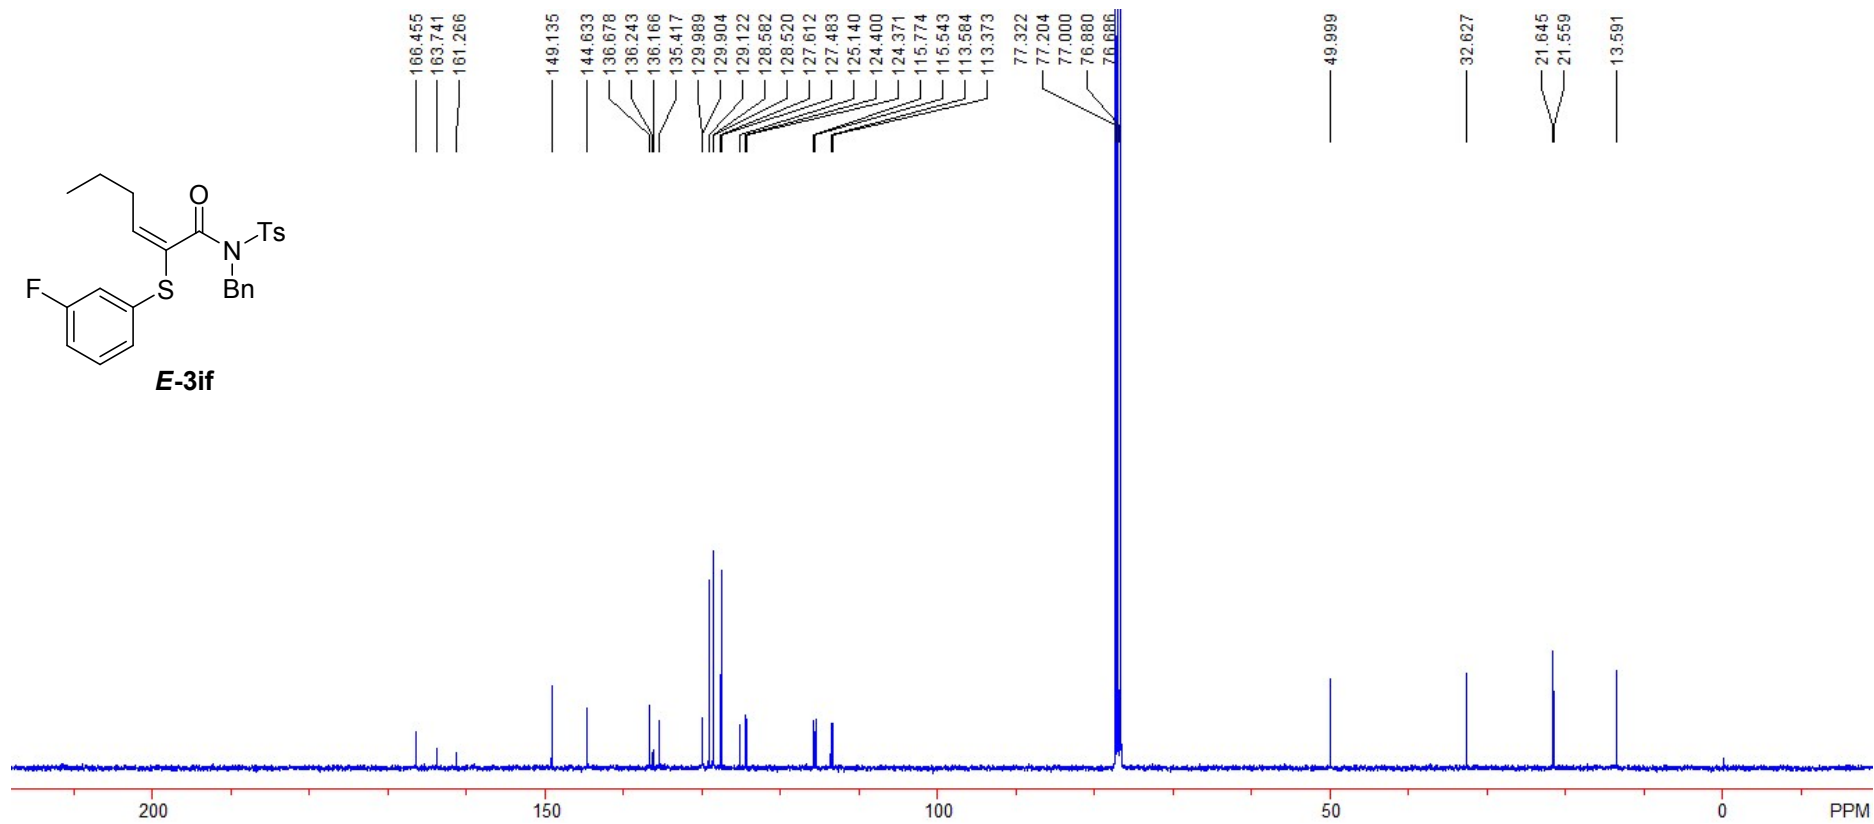

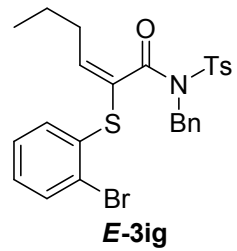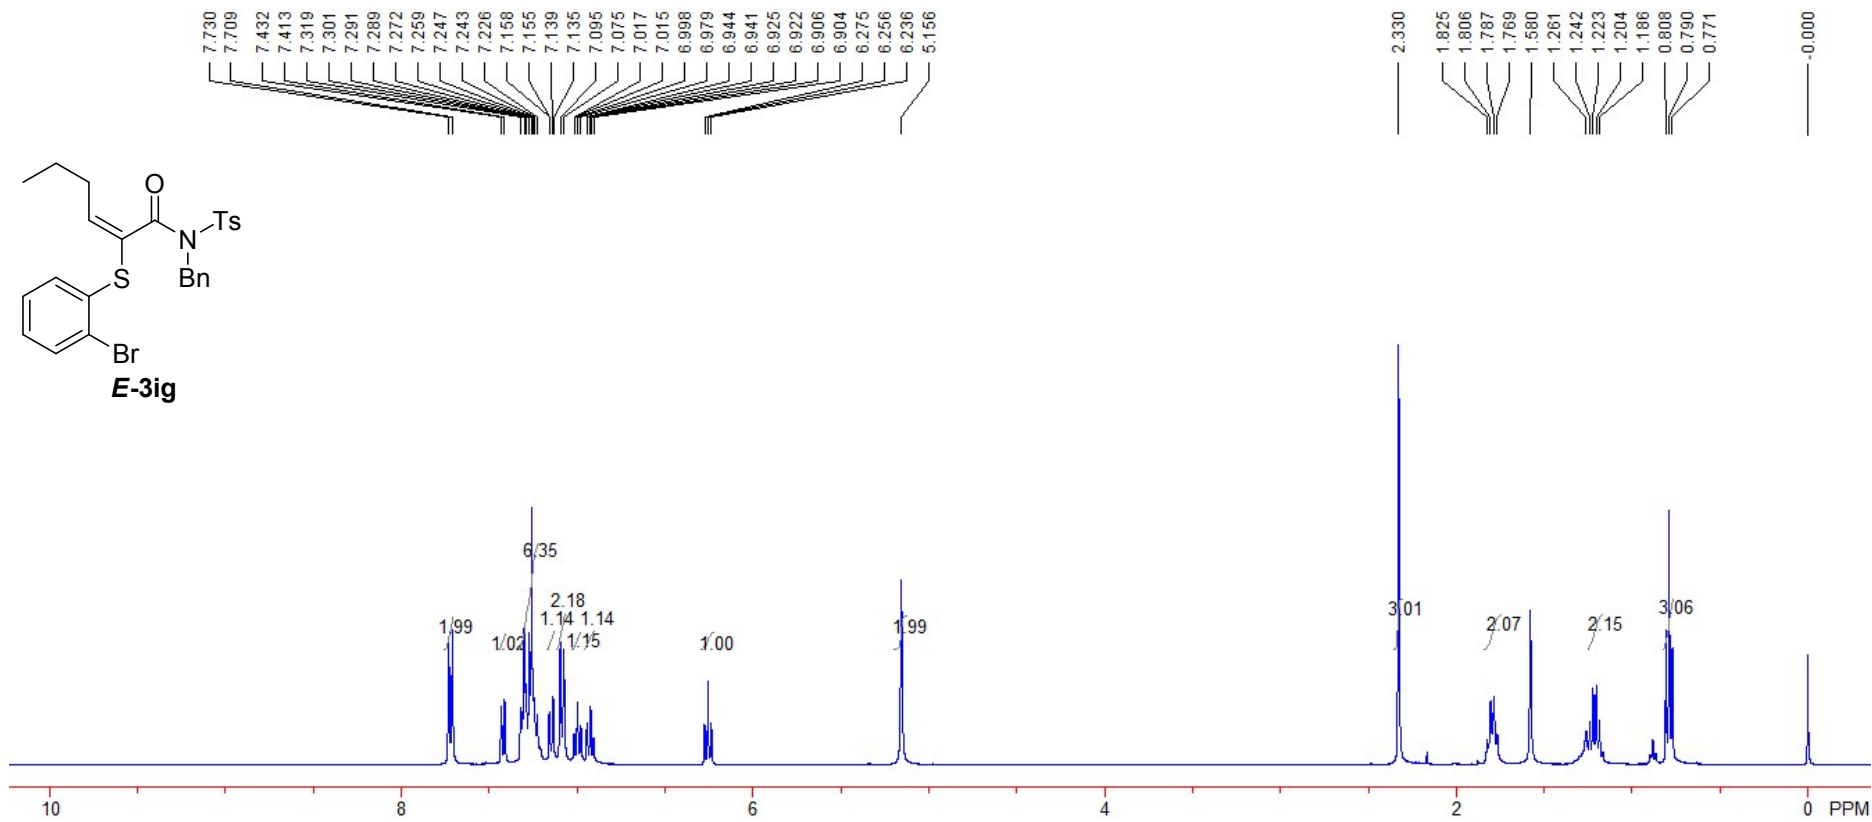

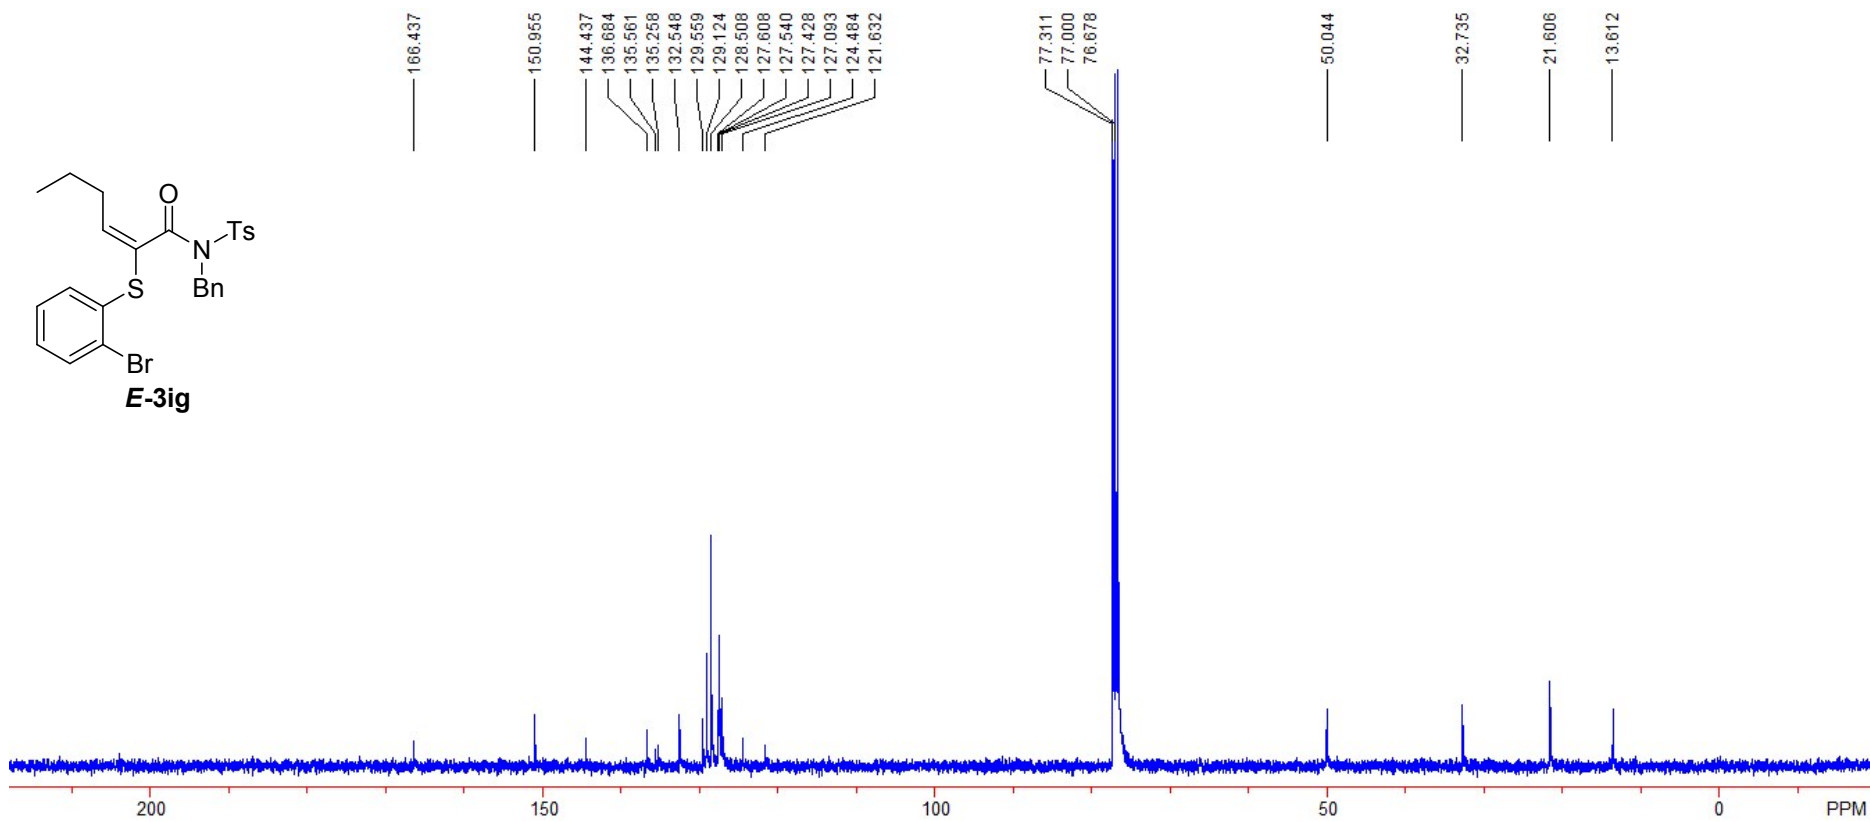

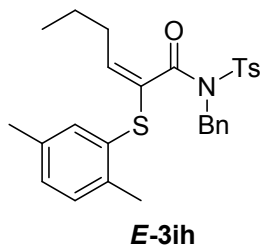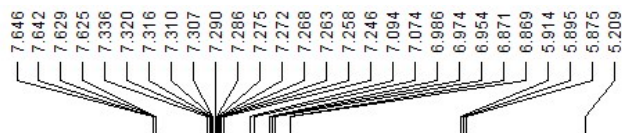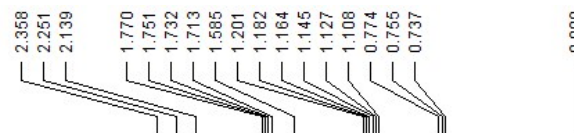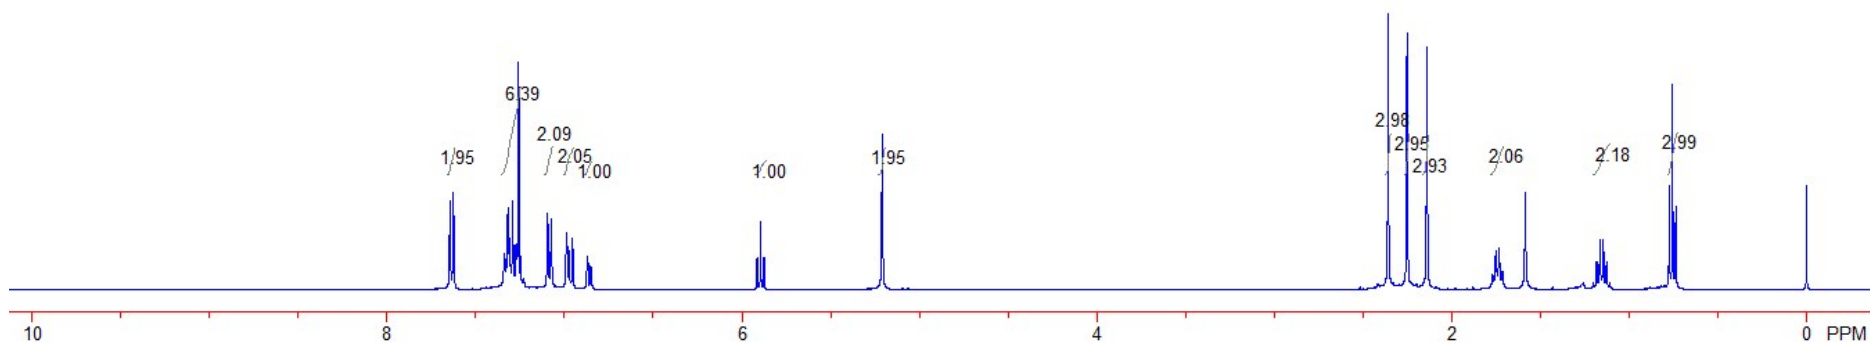



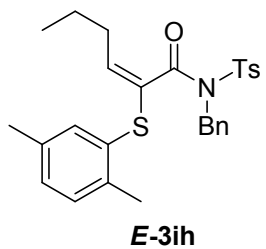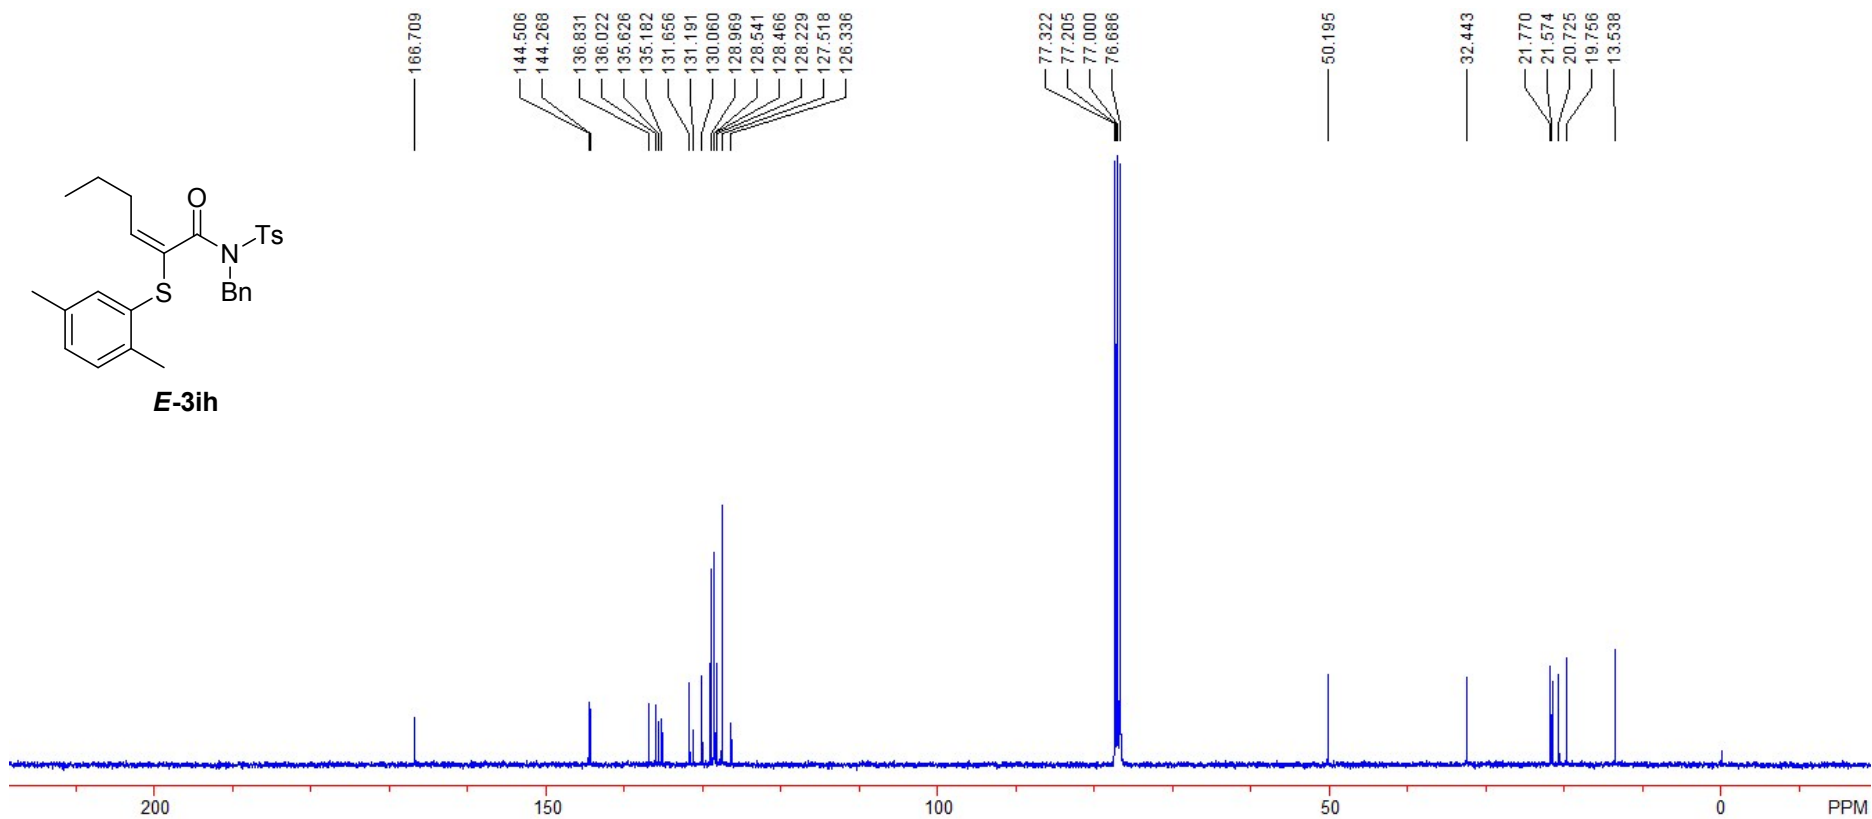

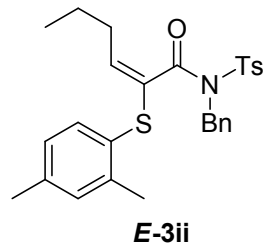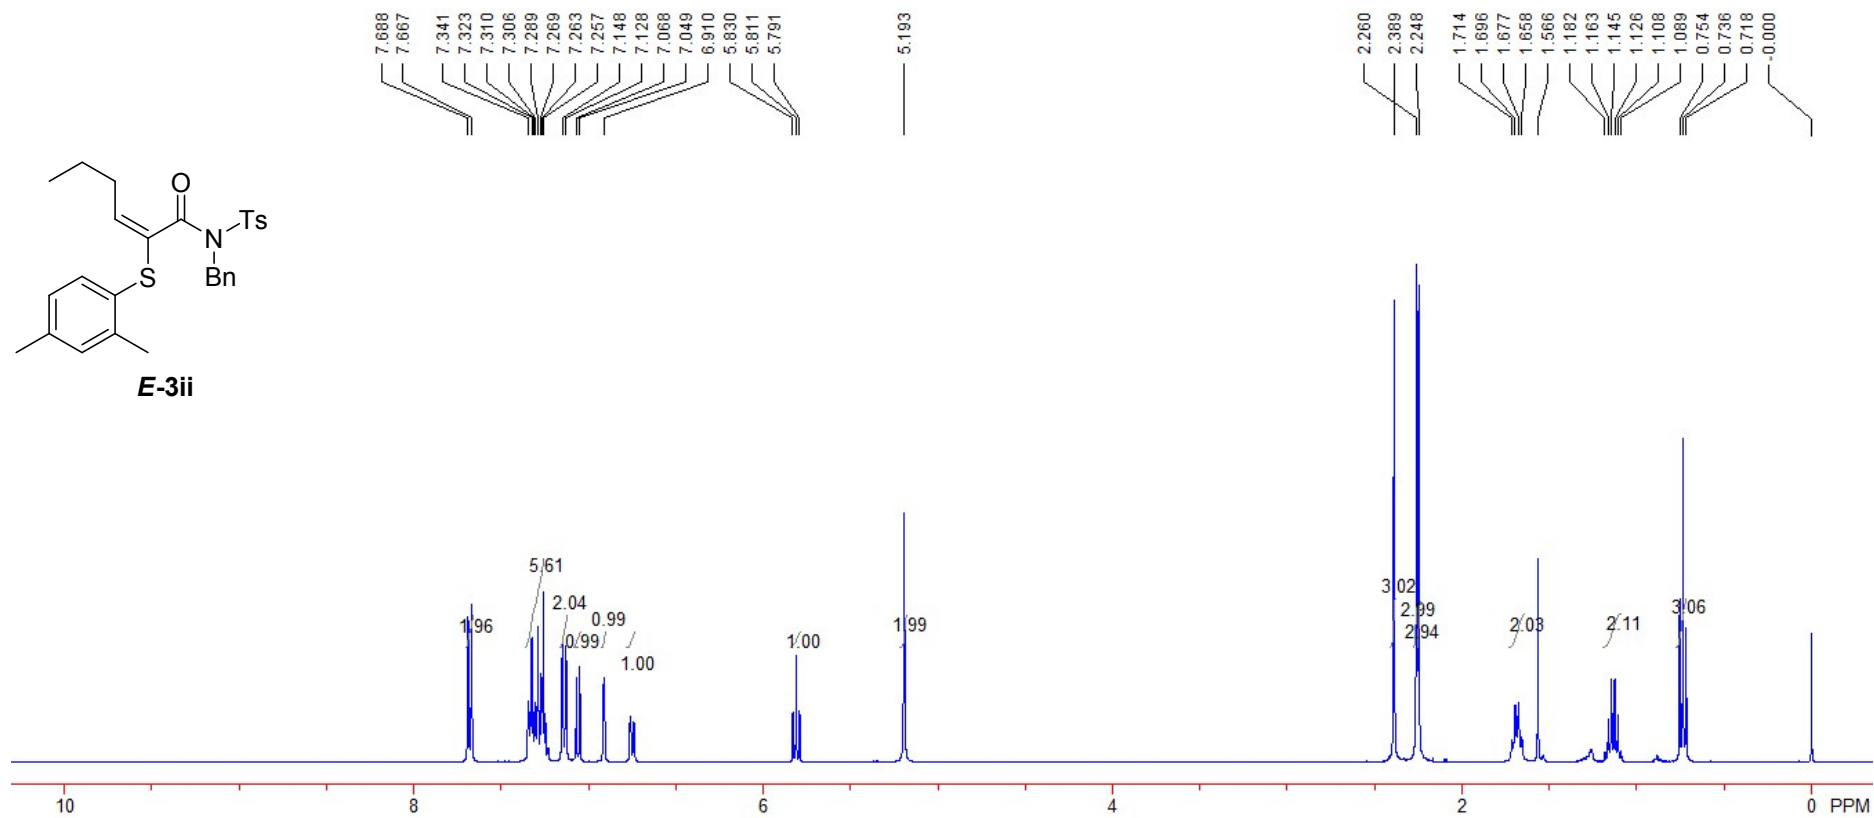

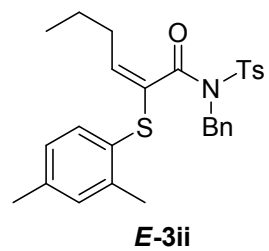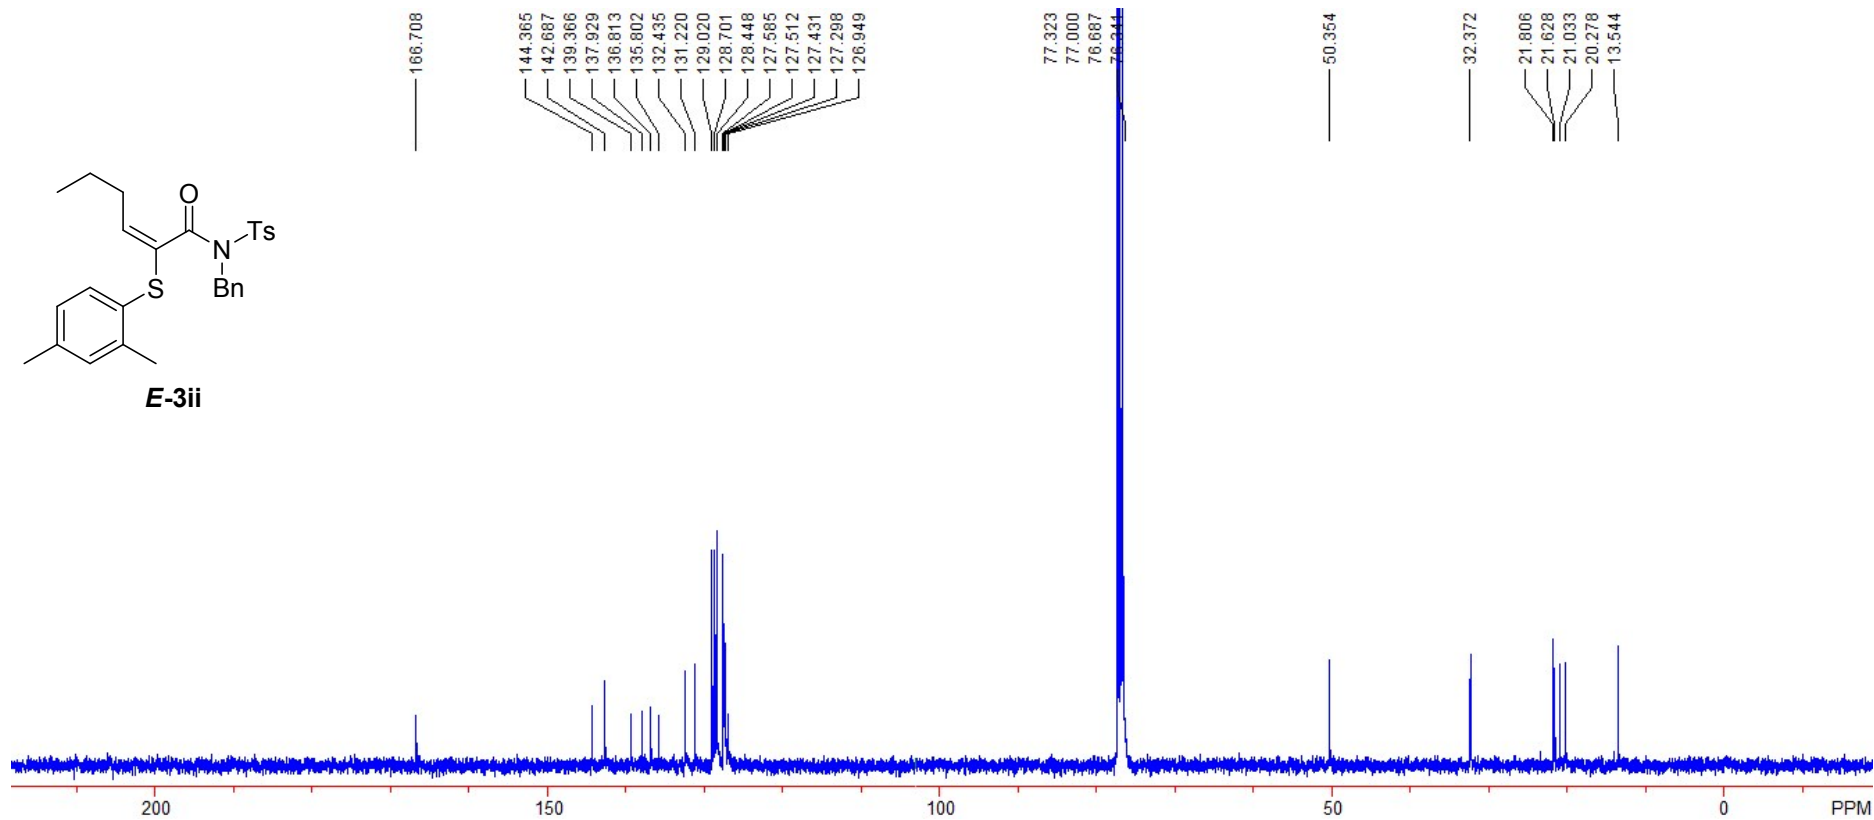

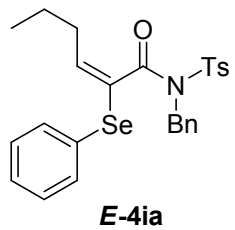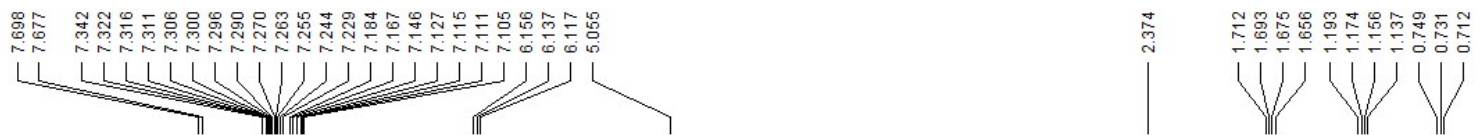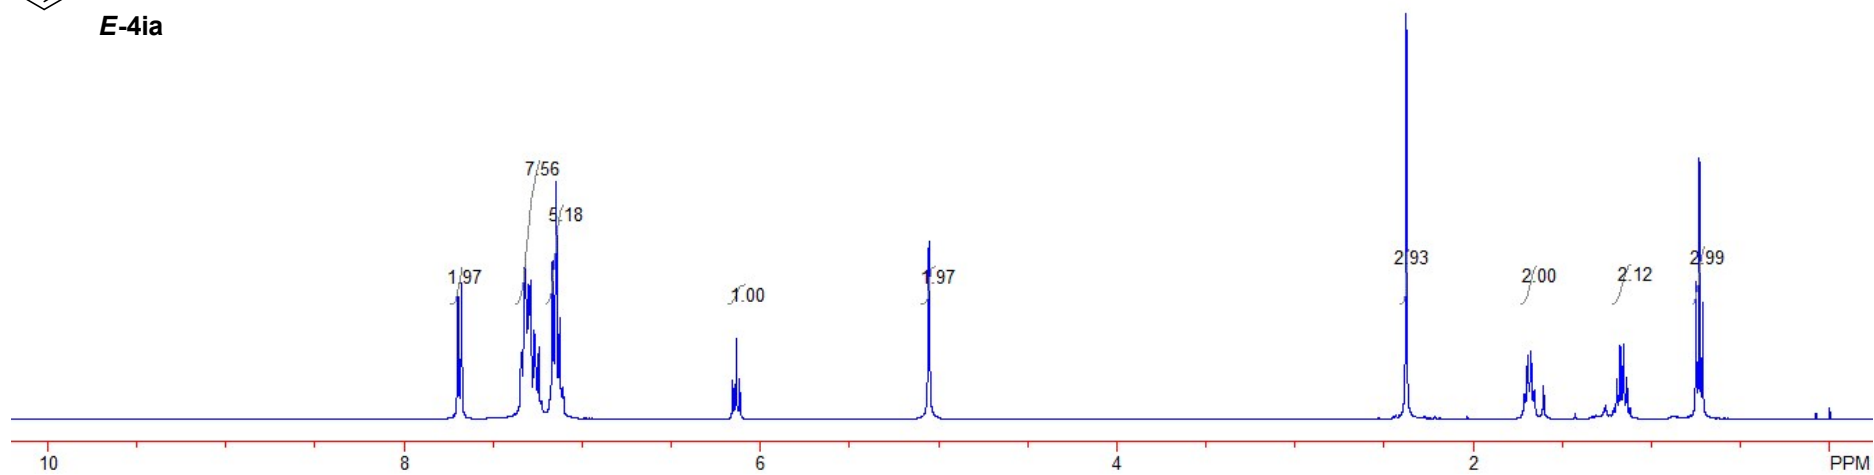

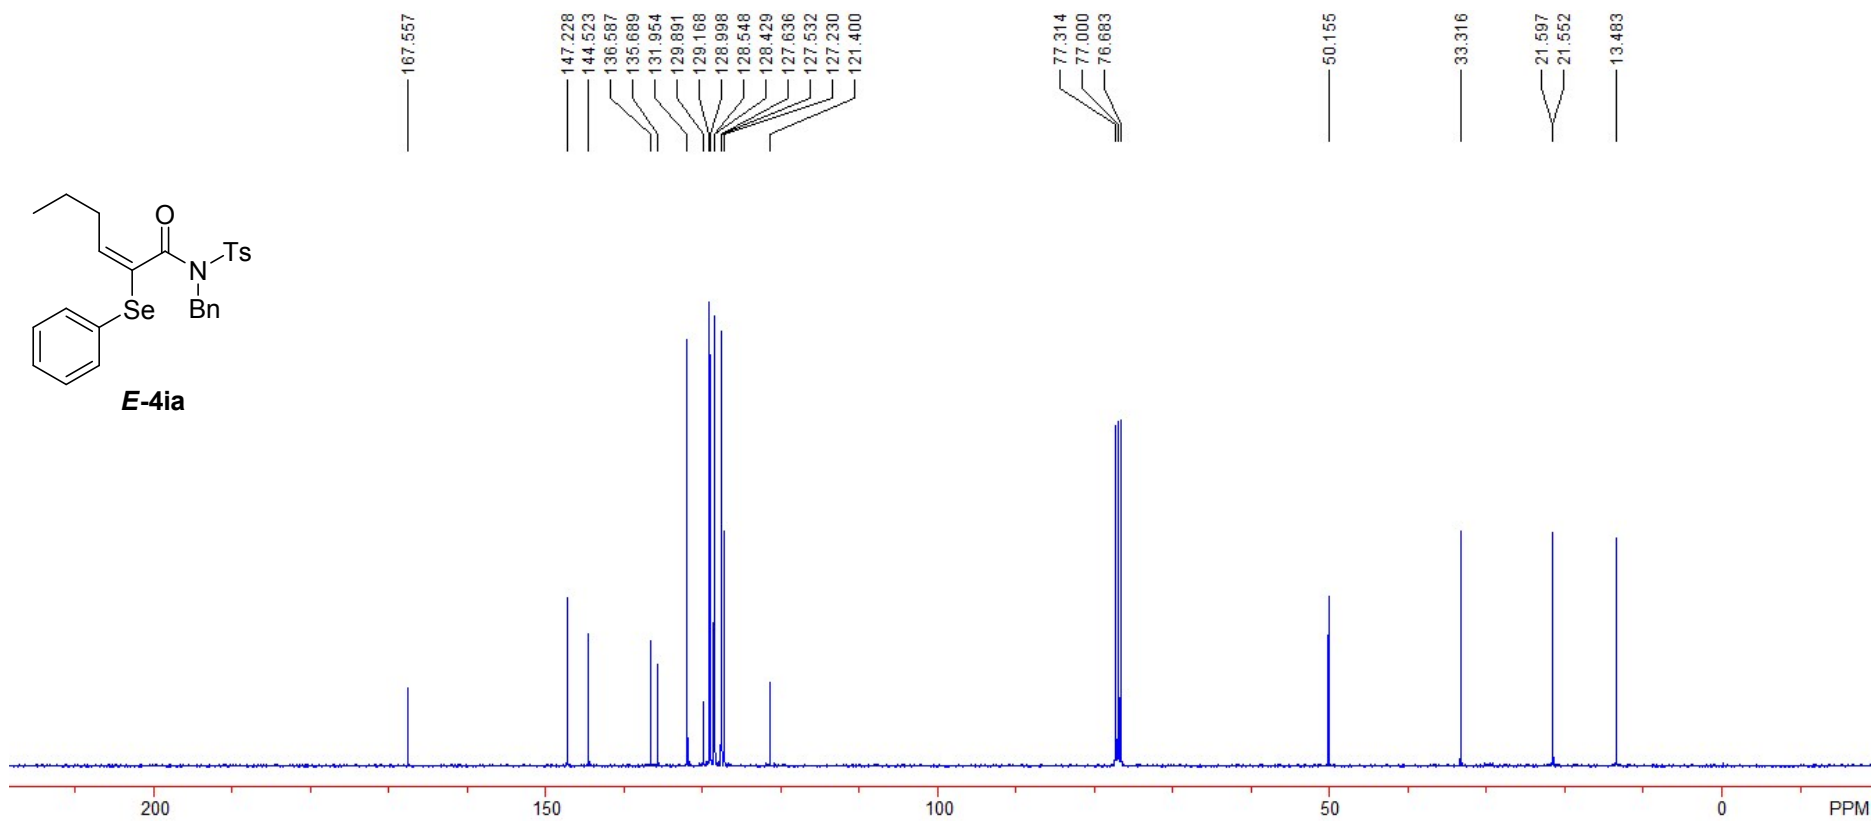

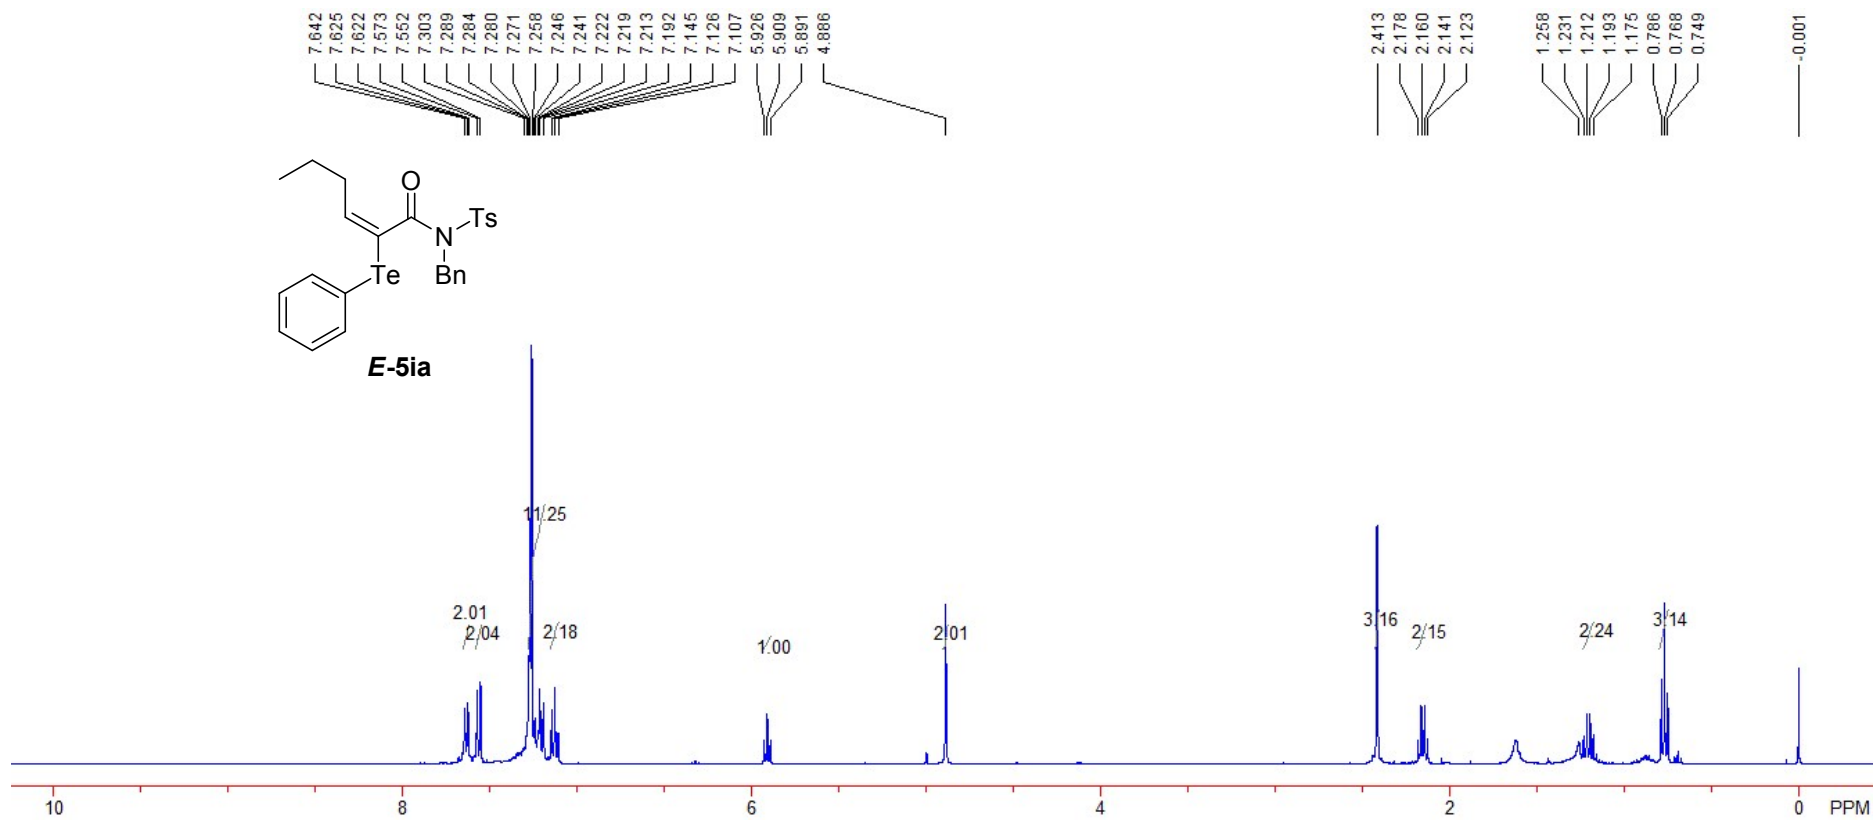

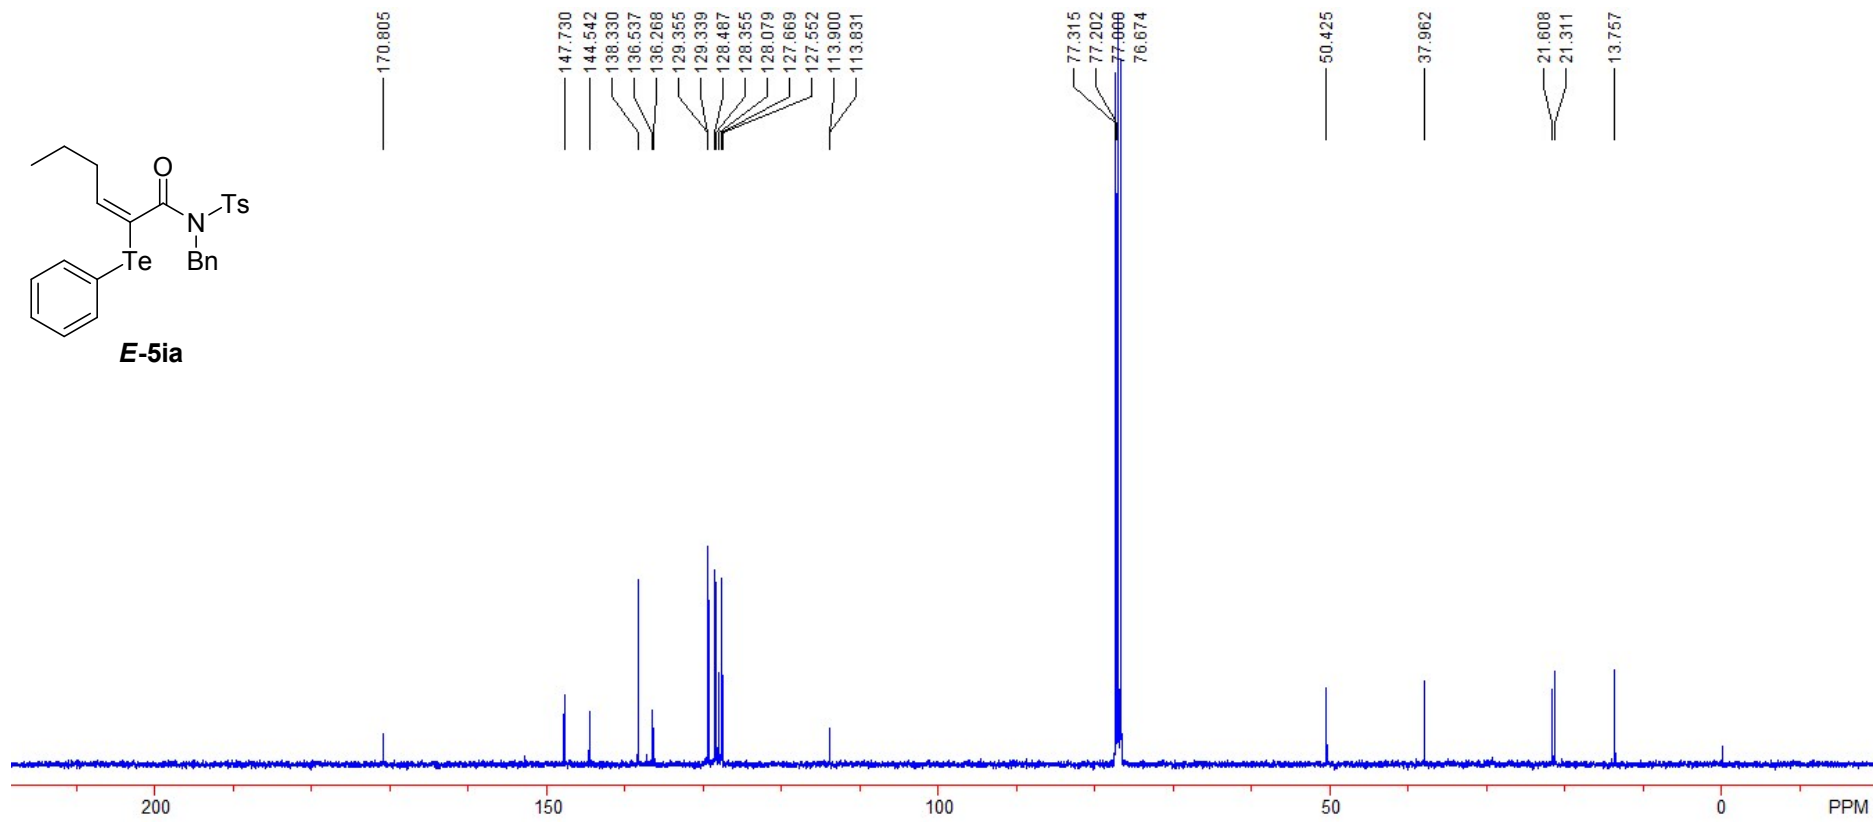

Supplement: c5cc10517j1.pdf [file c5cc10517j1.pdf]
